# Supplementary material for: Epidemiological features of influenza circulation in swine populations: A systematic review and meta-analysis
Source: PLoS One. 2017 Jun 7;12(6):e0179044. doi: 10.1371/journal.pone.0179044 (PMC5462427; doi:10.1371/journal.pone.0179044)
Supplement: S2 Table — (XLSX) [file pone.0179044.s007.xlsx]

## Sheet: final.dsp16
id	s1reference	author	year	title	journal	refstudy	recordnb	recorddetail	samplesize	nbpositive	prevpig	prevpig2	sampletype	population	strain	diseasetest	diseasetest2	vaccination	ili	premise	yearstart	yearend	studylength	publishyear	period	country	continent	countryarea	countrypig	countrygdp	humanpop	pighum
1	3	Adeola	2010	Detection of haemagglutination-inhibiting antibodies against human H1 and H3 strains of influenza A viruses in pigs in Ibadan, Nigeria	Zoonoses Public Health	2	NA	NA	91	82	90.1	90.1	serum	general	human	H1N1, H3N2	A,H1+H3	0	0	other/NA	2008	2008	1	2010-2016	Pre-pdm09	Nigeria	Africa	910770	8080000	3005.51	173615345	5
2	7	Awosanya	2013	Prevalence and correlates of influenza-A in piggery workers and pigs in two communities in Lagos, Nigeria	Pan Afr Med J	5	NA	NA	281	188	67	66.9	serum	general	influenza A	influenza A	A,H1+H3	NA	NA	other/NA	2010	2010	1	2010-2016	Post-pdm09	Nigeria	Africa	910770	8080000	3005.51	173615345	5
3	8	Barigazzi	2003	Swine influenza in Italy	Vet Res Commun	8	3	serology H3N2	7754	1826	23.5	23.5	serum	diseased	swine	H3N2	H3	NA	1	other/NA	1998	2001	4	2000-2004	Pre-pdm09	Italy	Europe	294140	8661500	35685.6	59831093	14
4	8	Barigazzi	2003	Swine influenza in Italy	Vet Res Commun	8	4	serology H1N1	7717	1320	17.1	17.1	serum	diseased	swine	H1N1	H1	NA	1	other/NA	1998	2001	4	2000-2004	Pre-pdm09	Italy	Europe	294140	8661500	35685.6	59831093	14
5	8	Barigazzi	2003	Swine influenza in Italy	Vet Res Commun	8	5	serology H1N2	5024	231	4.6	4.6	serum	diseased	swine	H1N2	H1	NA	1	other/NA	1998	2001	4	2000-2004	Pre-pdm09	Italy	Europe	294140	8661500	35685.6	59831093	14
6	9	Baudon	2015	Detection of Novel Reassortant Influenza A (H3N2) and H1N1 2009 Pandemic Viruses in Swine in Hanoi, Vietnam	Zoonoses Public Health	301	1	serology	334	147	44	44	serum	general	swine, human	influenza A	A,H1+H3	NA	0	slaughterhouse	2013	2013	1	2010-2016	Post-pdm09	Vietnam	Asia	310070	26261400	1910.51	89708900	29
7	12	Bikour	1995	Persistence of a 1930 swine influenza A (H1N1) virus in Quebec	J Gen Virol	10	1	H1N1 1st strain 1992-1993	5834	444	7.6	7.6	serum	general	swine	H1N1	H1	NA	NA	other/NA	1992	1993	2	1995-1999	Pre-pdm09	Canada	North America	9093510	12879000	51964.3	35158304	37
8	12	Bikour	1995	Persistence of a 1930 swine influenza A (H1N1) virus in Quebec	J Gen Virol	10	2	H1N1 2nd strain 1992-1993	2724	340	12.5	12.5	serum	general	swine	H1N1	H1	NA	NA	other/NA	1992	1993	2	1995-1999	Pre-pdm09	Canada	North America	9093510	12879000	51964.3	35158304	37
9	13	Bikour	1995	Recent H3N2 swine influenza virus with haemagglutinin and nucleoprotein genes similar to 1975 human strains	J Gen Virol	11	NA	NA	3922	243	6.2	6.2	serum	general	swine	H3N2	H3	NA	NA	farm	1990	1993	4	1995-1999	Pre-pdm09	Canada	North America	9093510	12879000	51964.3	35158304	37
10	19	Brown	1995	Disease outbreaks in pigs in Great Britain due to an influenza A virus of H1N2 subtype	Vet Rec	290	NA	NA	500	49	9.8	9.8	serum	general	human-like swine	H1N2	H1	NA	NA	other/NA	1991	1991	1	1995-1999	Pre-pdm09	UK	Europe	241930	4885000	41781.1	64097085	8
11	20	Brown	1995	Serological studies of influenza viruses in pigs in Great Britain 1991-2	Epidemiol Infect	14	NA	NA	2000	1193	59.7	59.6	serum	general	swine, human	H1N1, H3N2	A,H1+H3	NA	NA	slaughterhouse	1991	1992	2	1995-1999	Pre-pdm09	UK	Europe	241930	4885000	41781.1	64097085	8
12	22	Cao	2013	Avian influenza A (H5N1) virus antibodies in pigs and residents of swine farms, southern China	J Clin Virol	15	NA	NA	1980	0	0	0	serum	general	avian	H5N1	avian	NA	NA	farm	2008	2013	6	2010-2016	Post-pdm09	China	Asia	9388211	482398000	6807.43	1357380000	36
13	23	Cardinale	2012	Influenza A(H1N1)pdm09 virus in pigs, Reunion Island	Emerg Infect Dis	16	1	2009-2010	120	98	81.7	81.7	serum	general	human	H1N1	H1	NA	NA	slaughterhouse	2009	2010	2	2010-2016	Post-pdm09	France-Reunion	Africa	2512	68500	23501	840974	8
14	23	Cardinale	2012	Influenza A(H1N1)pdm09 virus in pigs, Reunion Island	Emerg Infect Dis	17	4	June 2010, sero ELISA	252	14	5.55	5.5	serum	general	influenza A	influenza A	A,H1+H3	NA	0	slaughterhouse	2010	2010	1	2010-2016	Post-pdm09	France-Reunion	Africa	2512	68500	23501	840974	8
15	23	Cardinale	2012	Influenza A(H1N1)pdm09 virus in pigs, Reunion Island	Emerg Infect Dis	19	5	March 2011, sero ELISA	256	72	28.12	28.1	serum	general	influenza A	influenza A	A,H1+H3	NA	NA	slaughterhouse	2011	2011	1	2010-2016	Post-pdm09	France-Reunion	Africa	2512	68500	23501	840974	8
16	23	Cardinale	2012	Influenza A(H1N1)pdm09 virus in pigs, Reunion Island	Emerg Infect Dis	20	6	July-August 2011, sero ELISA	316	109	34.49	34.5	serum	general	influenza A	influenza A	A,H1+H3	NA	NA	slaughterhouse	2011	2011	1	2010-2016	Post-pdm09	France-Reunion	Africa	2512	68500	23501	840974	8
17	23	Cardinale	2012	Influenza A(H1N1)pdm09 virus in pigs, Reunion Island	Emerg Infect Dis	21	7	October 2011, sero ELISA	259	106	40.93	40.9	serum	general	influenza A	influenza A	A,H1+H3	NA	NA	slaughterhouse	2011	2011	1	2010-2016	Post-pdm09	France-Reunion	Africa	2512	68500	23501	840974	8
18	24	Carman	1999	H3N2 influenza A virus recovered from a neonatal pig in Ontario--1997	Can Vet J	24	1	A/Swine/Wisconsin/49/76	107	57	53	53	serum	diseased	swine	H1N1	H1	NA	1	other/NA	1995	1995	1	1995-1999	Pre-pdm09	Canada	North America	9093510	12879000	51964.3	35158304	37
19	24	Carman	1999	H3N2 influenza A virus recovered from a neonatal pig in Ontario--1997	Can Vet J	24	2	A/Beijing/353/89	107	18	17	17	serum	diseased	human	H3N2	H3	NA	1	other/NA	1995	1995	1	1995-1999	Pre-pdm09	Canada	North America	9093510	12879000	51964.3	35158304	37
20	24	Carman	1999	H3N2 influenza A virus recovered from a neonatal pig in Ontario--1997	Can Vet J	24	3	A/Taiwan/1/86	107	4	4	4	serum	diseased	human	H1N1	H1	NA	1	other/NA	1995	1995	1	1995-1999	Pre-pdm09	Canada	North America	9093510	12879000	51964.3	35158304	37
21	24	Carman	1999	H3N2 influenza A virus recovered from a neonatal pig in Ontario--1997	Can Vet J	24	4	A/Swine/Saint Hyacinthe/150/90	107	0	0	0	serum	diseased	swine	H3N2	H3	NA	1	other/NA	1995	1995	1	1995-1999	Pre-pdm09	Canada	North America	9093510	12879000	51964.3	35158304	37
22	26	Chatterjee	1995	A serological survey of influenza a antibody in human and pig sera in Calcutta	Folia Microbiol (Praha)	27	1	H0N1	365	37	10.1	10.1	serum	general	human	H1N1	H1	NA	NA	other/NA	1984	1990	7	1995-1999	Pre-pdm09	India	Asia	2973190	10130000	1497.55	1252139596	1
23	26	Chatterjee	1995	A serological survey of influenza a antibody in human and pig sera in Calcutta	Folia Microbiol (Praha)	27	2	H1N1	365	206	56.4	56.4	serum	general	human	H1N1	H1	NA	NA	other/NA	1984	1990	7	1995-1999	Pre-pdm09	India	Asia	2973190	10130000	1497.55	1252139596	1
24	26	Chatterjee	1995	A serological survey of influenza a antibody in human and pig sera in Calcutta	Folia Microbiol (Praha)	27	3	H2N2	365	61	16.7	16.7	serum	general	human	H2N2	huH2N2	NA	NA	other/NA	1984	1990	7	1995-1999	Pre-pdm09	India	Asia	2973190	10130000	1497.55	1252139596	1
25	26	Chatterjee	1995	A serological survey of influenza a antibody in human and pig sera in Calcutta	Folia Microbiol (Praha)	27	4	H3N2	365	227	62.2	62.2	serum	general	human	H3N2	H3	NA	NA	other/NA	1984	1990	7	1995-1999	Pre-pdm09	India	Asia	2973190	10130000	1497.55	1252139596	1
26	27	Chen	2013	Co-circulation of pandemic 2009 H1N1, classical swine H1N1 and avian-like swine H1N1 influenza viruses in pigs in China	Infect Genet Evol	30	2	serology	1620	1260	77.8	77.8	serum	general	swine, human	H1N1, H1N2, H3N2	A,H1+H3	NA	NA	slaughterhouse	2009	2010	2	2010-2016	Post-pdm09	China	Asia	9388211	482398000	6807.43	1357380000	36
27	30	Choi	2002	Prevalence of swine influenza virus subtypes on swine farms in the United States	Arch Virol	32	1	serology	111418	25348	22.8	22.8	serum	diseased	swine	H1N1, H3N2	A,H1+H3	NA	1	farm	1998	2000	3	2000-2004	Pre-pdm09	USA	North America	9147420	64775000	53042	316128839	20
28	34	Choi	2005	Studies of H5N1 influenza virus infection of pigs by using viruses isolated in Vietnam and Thailand in 2004	J Virol	36	NA	NA	3175	8	0.25	0.3	serum	general	avian	H5N1	avian	NA	NA	slaughterhouse	2003	2004	2	2005-2009	Pre-pdm09	Vietnam	Asia	310070	26261400	1910.51	89708900	29
29	38	Conlan	2012	Serologic study of pig-associated viral zoonoses in Laos	Am J Trop Med Hyg	38	NA	NA	719	13	1.8	1.8	serum	general	influenza A	influenza A	A,H1+H3	NA	NA	slaughterhouse	2008	2009	2	2010-2016	Pre-pdm09	Lao PDR	Asia	230800	2800000	1660.71	6769727	41
30	42	Couacy-Hymann	2012	Surveillance for influenza viruses in poultry and swine, west Africa, 2006-2008	Emerg Infect Dis	40	3	serology	457	16	NA	3.5	serum	general	influenza A	influenza A	A,H1+H3	NA	NA	other/NA	2009	2010	2	2010-2016	Post-pdm09	Côte d'Ivoire	Africa	318000	362693	1528.94	20316086	2
31	43	Cuong	2014	Serological and virological surveillance for porcine reproductive and respiratory syndrome virus, porcine circovirus type 2, and influenza A viruses among smallholder swine farms of the Mekong Delta, Vietnam	Journal of Swine Health and Production	41	1	serology	124	47	37.9	37.9	serum	general	influenza A	influenza A	A,H1+H3	NA	NA	farm	2011	2011	1	2010-2016	Post-pdm09	Vietnam	Asia	310070	26261400	1910.51	89708900	29
32	44	Davidson	2014	Seroepidemiology Survey and Isolation of Swine Influenza Viruses from Subclinical Infections in Israel During the Years 2009-2011	Israel Journal of Veterinary Medicine	43	1	serology ELISA	777	621	NA	79.9	serum	general	influenza A	influenza A	A,H1+H3	NA	0	other/NA	2009	2011	3	2010-2016	Post-pdm09	Israel	Africa	21640	176900	36050.7	8059400	2
33	45	Dias	2015	Distribution of antibodies against influenza virus in pigs from farrow-to-finish farms in Minas Gerais state, Brazil	Influenza Other Respir Viruses	307	1	H1N1pdm09	3000	787	26.23	26.2	serum	general	swine	H1N1	H1	0	0	farm	2012	2012	1	2010-2016	Post-pdm09	Brazil	Latin America	8358140	36743593	11208.1	200361925	18
34	45	Dias	2015	Distribution of antibodies against influenza virus in pigs from farrow-to-finish farms in Minas Gerais state, Brazil	Influenza Other Respir Viruses	307	2	H3N2 sw	3000	47	1.57	1.6	serum	general	swine	H3N2	H3	0	0	farm	2012	2012	1	2010-2016	Post-pdm09	Brazil	Latin America	8358140	36743593	11208.1	200361925	18
35	47	Dibarbora	2013	Swine influenza: clinical, serological, pathological, and virological cross-sectional studies in nine farms in Argentina	Influenza Other Respir Viruses	45	1	serology	405	190	NA	46.9	serum	diseased	influenza A	influenza A	A,H1+H3	0	1	farm	2012	2012	1	2010-2016	Post-pdm09	Argentina	Latin America	2736690	2440000	14715.2	41446246	6
36	48	El-Sayed	2010	Avian influenza prevalence in pigs, Egypt	Emerg Infect Dis	47	1	serology	240	11	NA	4.6	serum	general	avian	H5N1, H5N2	avian	NA	0	other/NA	2008	2008	1	2010-2016	Pre-pdm09	Egypt	Africa	995450	10600	3314.46	82056378	0
37	49	El-Sayed	2013	Sero-prevalence of avian influenza in animals and human in Egypt	Pak J Biol Sci	49	NA	NA	93	4	4.3	4.3	serum	general	avian	H5N1	avian	NA	NA	other/NA	2013	2013	1	2010-2016	Post-pdm09	Egypt	Africa	995450	10600	3314.46	82056378	0
38	51	Fan	2012	Emergence and dissemination of a swine H3N2 reassortant influenza virus with 2009 pandemic H1N1 genes in pigs in China	J Virol	52	1	H3N2 TR	910	18	NA	2	serum	general	swine	H3N2	H3	NA	0	slaughterhouse	2010	2011	2	2010-2016	Post-pdm09	China	Asia	9388211	482398000	6807.43	1357380000	36
39	51	Fan	2012	Emergence and dissemination of a swine H3N2 reassortant influenza virus with 2009 pandemic H1N1 genes in pigs in China	J Virol	52	2	H3N2 human	910	0	NA	0	serum	general	human	H3N2	H3	NA	0	slaughterhouse	2010	2011	2	2010-2016	Post-pdm09	China	Asia	9388211	482398000	6807.43	1357380000	36
40	53	Foti	2008	Serological survey on Aujeszky's disease, swine influenza and porcine reproductive and respiratory syndrome virus infections in Italian pigs	Pol J Vet Sci	55	NA	NA	1170	327	27.9	27.9	serum	general	influenza A	influenza A	A,H1+H3	0	NA	other/NA	2002	2004	3	2005-2009	Pre-pdm09	Italy	Europe	294140	8661500	35685.6	59831093	14
41	54	Fragaszy	2015	Increased risk of A(H1N1)pdm09 influenza infection in UK pig industry workers compared to a general population cohort	Influenza Other Respir Viruses	309	1	CS H1N1	214	9	4	4.2	serum	general	swine, human	H1	H1	0	NA	farm	2010	2010	1	2010-2016	Post-pdm09	UK	Europe	241930	4885000	41781.1	64097085	8
42	54	Fragaszy	2015	Increased risk of A(H1N1)pdm09 influenza infection in UK pig industry workers compared to a general population cohort	Influenza Other Respir Viruses	309	2	swine H3N2 87	214	10	5	4.7	serum	general	swine, human	H3	H3	0	NA	farm	2010	2010	1	2010-2016	Post-pdm09	UK	Europe	241930	4885000	41781.1	64097085	8
43	54	Fragaszy	2015	Increased risk of A(H1N1)pdm09 influenza infection in UK pig industry workers compared to a general population cohort	Influenza Other Respir Viruses	309	3	swine avian-like H1N1	214	6	3	2.8	serum	general	swine, human	H1	H1	0	NA	farm	2010	2010	1	2010-2016	Post-pdm09	UK	Europe	241930	4885000	41781.1	64097085	8
44	54	Fragaszy	2015	Increased risk of A(H1N1)pdm09 influenza infection in UK pig industry workers compared to a general population cohort	Influenza Other Respir Viruses	309	4	H1N1pdm09	214	87	41	40.7	serum	general	swine, human	H1	H1	0	NA	farm	2010	2010	1	2010-2016	Post-pdm09	UK	Europe	241930	4885000	41781.1	64097085	8
45	56	Goto	1992	Antibody responses of swine to type A influenza viruses in the most recent several years	J Vet Med Sci	62	1	A/New Jersey/8/76 (H1N1)	4080	548	NA	13.4	serum	general	swine	H1N1	H1	NA	NA	slaughterhouse	1985	1990	6	1990-1994	Pre-pdm09	Japan	Asia	364560	9685000	38633.7	127338621	8
46	56	Goto	1992	Antibody responses of swine to type A influenza viruses in the most recent several years	J Vet Med Sci	62	2	A/USSR/92/77 (H1N1)	4080	1	NA	0	serum	general	human	H1N1	H1	NA	NA	slaughterhouse	1985	1990	6	1990-1994	Pre-pdm09	Japan	Asia	364560	9685000	38633.7	127338621	8
47	56	Goto	1992	Antibody responses of swine to type A influenza viruses in the most recent several years	J Vet Med Sci	62	3	A/Hokkaido/1/84 (H1N1)	4080	60	NA	1.5	serum	general	human	H1N1	H1	NA	NA	slaughterhouse	1985	1990	6	1990-1994	Pre-pdm09	Japan	Asia	364560	9685000	38633.7	127338621	8
48	56	Goto	1992	Antibody responses of swine to type A influenza viruses in the most recent several years	J Vet Med Sci	62	4	A/Hokkaido/2/87 (H1N1)	2760	50	NA	1.8	serum	general	human	H1N1	H1	NA	NA	slaughterhouse	1985	1990	6	1990-1994	Pre-pdm09	Japan	Asia	364560	9685000	38633.7	127338621	8
49	56	Goto	1992	Antibody responses of swine to type A influenza viruses in the most recent several years	J Vet Med Sci	62	5	A/Hokkaido/11/88 (H1N1)	1440	15	NA	1	serum	general	human	H1N1	H1	NA	NA	slaughterhouse	1985	1990	6	1990-1994	Pre-pdm09	Japan	Asia	364560	9685000	38633.7	127338621	8
50	56	Goto	1992	Antibody responses of swine to type A influenza viruses in the most recent several years	J Vet Med Sci	62	6	A/Yamanashi/2/77 (H3N2)	4080	199	NA	4.9	serum	general	human	H3N2	H3	NA	NA	slaughterhouse	1985	1990	6	1990-1994	Pre-pdm09	Japan	Asia	364560	9685000	38633.7	127338621	8
51	56	Goto	1992	Antibody responses of swine to type A influenza viruses in the most recent several years	J Vet Med Sci	62	7	A/Hokkaido/4/83 (H3N2)	4080	382	NA	9.4	serum	general	human	H3N2	H3	NA	NA	slaughterhouse	1985	1990	6	1990-1994	Pre-pdm09	Japan	Asia	364560	9685000	38633.7	127338621	8
52	56	Goto	1992	Antibody responses of swine to type A influenza viruses in the most recent several years	J Vet Med Sci	62	8	A/Hokkaido/5/85 (H3N2)	2880	103	NA	3.6	serum	general	human	H3N2	H3	NA	NA	slaughterhouse	1985	1990	6	1990-1994	Pre-pdm09	Japan	Asia	364560	9685000	38633.7	127338621	8
53	56	Goto	1992	Antibody responses of swine to type A influenza viruses in the most recent several years	J Vet Med Sci	62	9	A/Swine/Obihiro/10/85 (H3N2)	3360	239	NA	7.1	serum	general	human-like swine	H3N2	H3	NA	NA	slaughterhouse	1985	1990	6	1990-1994	Pre-pdm09	Japan	Asia	364560	9685000	38633.7	127338621	8
54	56	Goto	1992	Antibody responses of swine to type A influenza viruses in the most recent several years	J Vet Med Sci	62	10	A/Hokkaido/1/88 (H3N2)	2040	109	NA	5.3	serum	general	human	H3N2	H3	NA	NA	slaughterhouse	1985	1990	6	1990-1994	Pre-pdm09	Japan	Asia	364560	9685000	38633.7	127338621	8
55	56	Goto	1992	Antibody responses of swine to type A influenza viruses in the most recent several years	J Vet Med Sci	62	11	A/Hokkaido/20/89 (H3N2)	1440	6	NA	0.4	serum	general	human	H3N2	H3	NA	NA	slaughterhouse	1985	1990	6	1990-1994	Pre-pdm09	Japan	Asia	364560	9685000	38633.7	127338621	8
56	59	Groschup	1993	Serological studies on the potential synergism of porcine reproductive and respiratory syndrome virus and influenza-, corona- and paramyxoviruses in the induction of respiratory symptoms in swine	Zentralbl Veterinarmed B	287	1	pig level SP	265	153	57.7	57.7	serum	diseased	swine, human	H1N1, H3N2	A,H1+H3	NA	1	other/NA	1991	1992	2	1990-1994	Pre-pdm09	Germany	Europe	348540	27690100	46251.4	80621788	34
57	60	Gu	2012	Serological surveillance of swine influenza virus infection in seven cities located in Guangdong province, South China in 2010	Journal of Animal and Veterinary Advances	64	1	influenza A	653	328	50.2	50.2	serum	general	swine	influenza A	A,H1+H3	NA	0	farm	2010	2011	2	2010-2016	Post-pdm09	China	Asia	9388211	482398000	6807.43	1357380000	36
58	60	Gu	2012	Serological surveillance of swine influenza virus infection in seven cities located in Guangdong province, South China in 2010	Journal of Animal and Veterinary Advances	64	2	H9N2	653	9	1.4	1.4	serum	general	avian-like swine	H9N2	avian	NA	0	farm	2010	2011	2	2010-2016	Post-pdm09	China	Asia	9388211	482398000	6807.43	1357380000	36
59	61	Guan	1996	Emergence of avian H1N1 influenza viruses in pigs in China	J Virol	66	2	serology H1N1	636	83	13	13	serum	general	swine	H1N1	H1	NA	0	slaughterhouse	1993	1994	2	1995-1999	Pre-pdm09	China	Asia	9388211	482398000	6807.43	1357380000	36
60	61	Guan	1996	Emergence of avian H1N1 influenza viruses in pigs in China	J Virol	66	3	serology H3N2 Victoria	636	16	2.5	2.5	serum	general	human	H3N2	H3	NA	0	slaughterhouse	1993	1994	2	1995-1999	Pre-pdm09	China	Asia	9388211	482398000	6807.43	1357380000	36
61	61	Guan	1996	Emergence of avian H1N1 influenza viruses in pigs in China	J Virol	66	4	serology H3N2 Hong Kong	636	19	3	3	serum	general	human	H3N2	H3	NA	0	slaughterhouse	1993	1994	2	1995-1999	Pre-pdm09	China	Asia	9388211	482398000	6807.43	1357380000	36
62	70	Jacques-Simon	2013	A field and laboratory investigation of viral diseases of swine in the Republic of Haiti	Journal of Swine Health and Production	74	1	H1N1	109	24	22	22	serum	general	swine	H1N1	H1	NA	0	farm	2010	2010	1	2010-2016	Post-pdm09	Haiti	Latin America	27560	1001000	819.904	10317461	10
63	70	Jacques-Simon	2013	A field and laboratory investigation of viral diseases of swine in the Republic of Haiti	Journal of Swine Health and Production	74	2	H3N2	109	13	11.9	11.9	serum	general	swine	H3N2	H3	NA	0	farm	2010	2010	1	2010-2016	Post-pdm09	Haiti	Latin America	27560	1001000	819.904	10317461	10
64	71	Jimenez	2014	Association of swine influenza H1N1 pandemic virus (SIV-H1N1p) with porcine respiratory disease complex in sows from commercial pig farms in Colombia	Virol Sin	76	2	serology	198	66	33.3	33.3	serum	general	human	H1N1	H1	NA	NA	farm	2009	2009	1	2010-2016	Post-pdm09	Colombia	Latin America	1109500	5340890	7831.22	48321405	11
65	72	Jo	2007	Genetic and antigenic characterization of swine H1N2 influenza viruses isolated from Korean pigs	J Microbiol Biotechnol	78	2	serology	595	276	46.3	46.4	serum	general	swine	H1N2	H1	NA	NA	other/NA	2005	2006	2	2005-2009	Pre-pdm09	South Korea	Asia	97350	9912204	25977	50219669	20
66	75	Jung	2007	Serologic surveillance of swine H1 and H3 and avian H5 and H9 influenza A virus infections in swine population in Korea	Prev Vet Med	80	1	H1, H3	742	516	NA	69.5	serum	general	swine	H1, H3	A,H1+H3	NA	NA	farm	2005	2006	2	2005-2009	Pre-pdm09	South Korea	Asia	97350	9912204	25977	50219669	20
67	75	Jung	2007	Serologic surveillance of swine H1 and H3 and avian H5 and H9 influenza A virus infections in swine population in Korea	Prev Vet Med	80	2	H5, H9	742	0	0	0	serum	general	avian	H5, H9	avian	NA	NA	farm	2005	2006	2	2005-2009	Pre-pdm09	South Korea	Asia	97350	9912204	25977	50219669	20
68	78	Katsuda	1995	Antigenic and genetic analyses of the hemagglutinin of influenza viruses isolated from pigs in 1993	J Vet Med Sci	244	2	serology average 1988-94	5040	469	9.3	9.3	serum	general	swine	H3N2	H3	NA	NA	slaughterhouse	1988	1994	7	1995-1999	Pre-pdm09	Japan	Asia	364560	9685000	38633.7	127338621	8
69	80	Katsuda	1995	Prevalence of antibodies to type A influenza viruses in swine sera 1990-1994	J Vet Med Sci	275	1	sero H1N1 A/USSR/92/77	3120	0	NA	0	serum	general	human	H1N1	H1	NA	NA	slaughterhouse	1990	1994	5	1995-1999	Pre-pdm09	Japan	Asia	364560	9685000	38633.7	127338621	8
70	80	Katsuda	1995	Prevalence of antibodies to type A influenza viruses in swine sera 1990-1994	J Vet Med Sci	275	2	sero H1N1 A/Hokkaido/1/84	3120	2	NA	0.1	serum	general	human	H1N1	H1	NA	NA	slaughterhouse	1990	1994	5	1995-1999	Pre-pdm09	Japan	Asia	364560	9685000	38633.7	127338621	8
71	80	Katsuda	1995	Prevalence of antibodies to type A influenza viruses in swine sera 1990-1994	J Vet Med Sci	275	3	sero H1N1 A/Hokkaido/2/87	3120	2	NA	0.1	serum	general	human	H1N1	H1	NA	NA	slaughterhouse	1990	1994	5	1995-1999	Pre-pdm09	Japan	Asia	364560	9685000	38633.7	127338621	8
72	80	Katsuda	1995	Prevalence of antibodies to type A influenza viruses in swine sera 1990-1994	J Vet Med Sci	275	4	sero H1N1 A/Hokkaido/11/88	3120	7	NA	0.2	serum	general	human	H1N1	H1	NA	NA	slaughterhouse	1990	1994	5	1995-1999	Pre-pdm09	Japan	Asia	364560	9685000	38633.7	127338621	8
73	80	Katsuda	1995	Prevalence of antibodies to type A influenza viruses in swine sera 1990-1994	J Vet Med Sci	275	5	sero H1N1 A/Hokkaido/3/92	2400	2	NA	0.1	serum	general	human	H1N1	H1	NA	NA	slaughterhouse	1990	1994	5	1995-1999	Pre-pdm09	Japan	Asia	364560	9685000	38633.7	127338621	8
74	80	Katsuda	1995	Prevalence of antibodies to type A influenza viruses in swine sera 1990-1994	J Vet Med Sci	275	6	sero H1N1 A/New Jersey/8/76	3120	105	NA	3.4	serum	general	human	H1N1	H1	NA	NA	slaughterhouse	1990	1994	5	1995-1999	Pre-pdm09	Japan	Asia	364560	9685000	38633.7	127338621	8
75	80	Katsuda	1995	Prevalence of antibodies to type A influenza viruses in swine sera 1990-1994	J Vet Med Sci	275	7	sero H1N1 A/sw/Taiwan/1/93	2400	50	NA	2.1	serum	general	swine	H1N1	H1	NA	NA	slaughterhouse	1990	1994	5	1995-1999	Pre-pdm09	Japan	Asia	364560	9685000	38633.7	127338621	8
76	80	Katsuda	1995	Prevalence of antibodies to type A influenza viruses in swine sera 1990-1994	J Vet Med Sci	275	8	sero H3N2 A/Hokkaido/4/83	3120	389	NA	12.5	serum	general	human	H3N2	H3	NA	NA	slaughterhouse	1990	1994	5	1995-1999	Pre-pdm09	Japan	Asia	364560	9685000	38633.7	127338621	8
77	80	Katsuda	1995	Prevalence of antibodies to type A influenza viruses in swine sera 1990-1994	J Vet Med Sci	275	9	sero H3N2 A/Hokkaido/5/85	3120	293	NA	9.4	serum	general	human	H3N2	H3	NA	NA	slaughterhouse	1990	1994	5	1995-1999	Pre-pdm09	Japan	Asia	364560	9685000	38633.7	127338621	8
78	80	Katsuda	1995	Prevalence of antibodies to type A influenza viruses in swine sera 1990-1994	J Vet Med Sci	275	10	sero H3N2 A/Hokkaido/1/88	3120	402	NA	12.9	serum	general	human	H3N2	H3	NA	NA	slaughterhouse	1990	1994	5	1995-1999	Pre-pdm09	Japan	Asia	364560	9685000	38633.7	127338621	8
79	80	Katsuda	1995	Prevalence of antibodies to type A influenza viruses in swine sera 1990-1994	J Vet Med Sci	275	11	sero H3N2 A/Hokkaido/20/89	3120	16	NA	0.5	serum	general	human	H3N2	H3	NA	NA	slaughterhouse	1990	1994	5	1995-1999	Pre-pdm09	Japan	Asia	364560	9685000	38633.7	127338621	8
80	80	Katsuda	1995	Prevalence of antibodies to type A influenza viruses in swine sera 1990-1994	J Vet Med Sci	275	12	sero H3N2 A/Hokkaido/4/90	3120	19	NA	0.6	serum	general	human	H3N2	H3	NA	NA	slaughterhouse	1990	1994	5	1995-1999	Pre-pdm09	Japan	Asia	364560	9685000	38633.7	127338621	8
81	80	Katsuda	1995	Prevalence of antibodies to type A influenza viruses in swine sera 1990-1994	J Vet Med Sci	275	13	sero H3N2 A/Hokkaido/21/91	2400	267	NA	11.1	serum	general	human	H3N2	H3	NA	NA	slaughterhouse	1990	1994	5	1995-1999	Pre-pdm09	Japan	Asia	364560	9685000	38633.7	127338621	8
82	80	Katsuda	1995	Prevalence of antibodies to type A influenza viruses in swine sera 1990-1994	J Vet Med Sci	275	14	sero H3N2 A/Hokkaido/41/92	1680	13	NA	0.8	serum	general	human	H3N2	H3	NA	NA	slaughterhouse	1990	1994	5	1995-1999	Pre-pdm09	Japan	Asia	364560	9685000	38633.7	127338621	8
83	80	Katsuda	1995	Prevalence of antibodies to type A influenza viruses in swine sera 1990-1994	J Vet Med Sci	275	15	sero H3N2 A/Hokkaido/2/93	1680	13	NA	0.8	serum	general	human	H3N2	H3	NA	NA	slaughterhouse	1990	1994	5	1995-1999	Pre-pdm09	Japan	Asia	364560	9685000	38633.7	127338621	8
84	80	Katsuda	1995	Prevalence of antibodies to type A influenza viruses in swine sera 1990-1994	J Vet Med Sci	275	16	sero H3N2 A/Beijing 352/89	1680	137	NA	8.2	serum	general	human	H3N2	H3	NA	NA	slaughterhouse	1990	1994	5	1995-1999	Pre-pdm09	Japan	Asia	364560	9685000	38633.7	127338621	8
85	83	Kirunda	2014	Prevalence of influenza A viruses in livestock and free-living waterfowl in Uganda	BMC Vet Res	86	2	serology	417	19	4.6	4.6	serum	general	influenza A	influenza A	A,H1+H3	NA	0	other/NA	2010	2011	2	2010-2016	Post-pdm09	Uganda	Africa	199810	2497600	657.371	37578876	7
86	85	Kong	2011	Isolation and Phylogenetic Analysis of H1N1 Swine Influenza Virus from Sick Pigs in Southern China	Indian J Virol	89	NA	NA	475	101	21.4	21.3	serum	general	swine	H1N1	H1	NA	NA	farm	2009	2009	1	2010-2016	Post-pdm09	China	Asia	9388211	482398000	6807.43	1357380000	36
87	90	Kyriakis	2013	Influenza A virus infection dynamics in swine farms in Belgium, France, Italy and Spain, 2006-2008	Vet Microbiol	363	1	Belgium S06	200	142	71	71	serum	general	swine	H1N1, H1N2, H3N2	A,H1+H3	0	NA	farm	2006	2006	1	2010-2016	Pre-pdm09	Belgium	Europe	30280	6592978	46929.6	11195138	59
88	90	Kyriakis	2013	Influenza A virus infection dynamics in swine farms in Belgium, France, Italy and Spain, 2006-2008	Vet Microbiol	364	2	Belgium 06-07	150	104	69	69	serum	general	swine	H1N1, H1N2, H3N2	A,H1+H3	0	NA	farm	2006	2007	2	2010-2016	Pre-pdm09	Belgium	Europe	30280	6592978	46929.6	11195138	59
89	90	Kyriakis	2013	Influenza A virus infection dynamics in swine farms in Belgium, France, Italy and Spain, 2006-2008	Vet Microbiol	365	3	Belgium S07	200	106	53	53	serum	general	swine	H1N1, H1N2, H3N2	A,H1+H3	0	NA	farm	2007	2007	1	2010-2016	Pre-pdm09	Belgium	Europe	30280	6592978	46929.6	11195138	59
90	90	Kyriakis	2013	Influenza A virus infection dynamics in swine farms in Belgium, France, Italy and Spain, 2006-2008	Vet Microbiol	366	4	Belgium 07-08	202	133	66	66	serum	general	swine	H1N1, H1N2, H3N2	A,H1+H3	0	NA	farm	2007	2008	2	2010-2016	Pre-pdm09	Belgium	Europe	30280	6592978	46929.6	11195138	59
91	90	Kyriakis	2013	Influenza A virus infection dynamics in swine farms in Belgium, France, Italy and Spain, 2006-2008	Vet Microbiol	367	5	Belgium S08	200	100	50	50	serum	general	swine	H1N1, H1N2, H3N2	A,H1+H3	0	NA	farm	2008	2008	1	2010-2016	Pre-pdm09	Belgium	Europe	30280	6592978	46929.6	11195138	59
92	90	Kyriakis	2013	Influenza A virus infection dynamics in swine farms in Belgium, France, Italy and Spain, 2006-2008	Vet Microbiol	368	6	Belgium 08-09	200	100	50	50	serum	general	swine	H1N1, H1N2, H3N2	A,H1+H3	0	NA	farm	2008	2009	2	2010-2016	Pre-pdm09	Belgium	Europe	30280	6592978	46929.6	11195138	59
93	90	Kyriakis	2013	Influenza A virus infection dynamics in swine farms in Belgium, France, Italy and Spain, 2006-2008	Vet Microbiol	369	7	Italy S06	170	105	62	62	serum	general	swine	H1N1, H1N2, H3N2	A,H1+H3	0	NA	farm	2006	2006	1	2010-2016	Pre-pdm09	Italy	Europe	294140	8661500	35685.6	59831093	14
94	90	Kyriakis	2013	Influenza A virus infection dynamics in swine farms in Belgium, France, Italy and Spain, 2006-2008	Vet Microbiol	370	8	Italy 06-07	130	84	65	65	serum	general	swine	H1N1, H1N2, H3N2	A,H1+H3	0	NA	farm	2006	2007	2	2010-2016	Pre-pdm09	Italy	Europe	294140	8661500	35685.6	59831093	14
95	90	Kyriakis	2013	Influenza A virus infection dynamics in swine farms in Belgium, France, Italy and Spain, 2006-2008	Vet Microbiol	371	9	Italy S07	170	85	50	50	serum	general	swine	H1N1, H1N2, H3N2	A,H1+H3	0	NA	farm	2007	2007	1	2010-2016	Pre-pdm09	Italy	Europe	294140	8661500	35685.6	59831093	14
96	90	Kyriakis	2013	Influenza A virus infection dynamics in swine farms in Belgium, France, Italy and Spain, 2006-2008	Vet Microbiol	372	10	Italy 07-08	150	76	51	51	serum	general	swine	H1N1, H1N2, H3N2	A,H1+H3	0	NA	farm	2007	2008	2	2010-2016	Pre-pdm09	Italy	Europe	294140	8661500	35685.6	59831093	14
97	90	Kyriakis	2013	Influenza A virus infection dynamics in swine farms in Belgium, France, Italy and Spain, 2006-2008	Vet Microbiol	373	11	Italy S08	150	50	33	33	serum	general	swine	H1N1, H1N2, H3N2	A,H1+H3	0	NA	farm	2008	2008	1	2010-2016	Pre-pdm09	Italy	Europe	294140	8661500	35685.6	59831093	14
98	90	Kyriakis	2013	Influenza A virus infection dynamics in swine farms in Belgium, France, Italy and Spain, 2006-2008	Vet Microbiol	374	12	Italy 08-09	150	87	58	58	serum	general	swine	H1N1, H1N2, H3N2	A,H1+H3	0	NA	farm	2008	2009	2	2010-2016	Pre-pdm09	Italy	Europe	294140	8661500	35685.6	59831093	14
99	90	Kyriakis	2013	Influenza A virus infection dynamics in swine farms in Belgium, France, Italy and Spain, 2006-2008	Vet Microbiol	375	13	France 06	220	117	53	53	serum	general	swine	H1N1, H1N2, H3N2	A,H1+H3	0	NA	farm	2006	2006	1	2010-2016	Pre-pdm09	France	Europe	547561	13487588	42560.4	66028467	20
100	90	Kyriakis	2013	Influenza A virus infection dynamics in swine farms in Belgium, France, Italy and Spain, 2006-2008	Vet Microbiol	376	14	France 06-07	220	150	68	68	serum	general	swine	H1N1, H1N2, H3N2	A,H1+H3	0	NA	farm	2006	2007	2	2010-2016	Pre-pdm09	France	Europe	547561	13487588	42560.4	66028467	20
101	90	Kyriakis	2013	Influenza A virus infection dynamics in swine farms in Belgium, France, Italy and Spain, 2006-2008	Vet Microbiol	377	15	France 07	220	114	52	52	serum	general	swine	H1N1, H1N2, H3N2	A,H1+H3	0	NA	farm	2007	2007	1	2010-2016	Pre-pdm09	France	Europe	547561	13487588	42560.4	66028467	20
102	90	Kyriakis	2013	Influenza A virus infection dynamics in swine farms in Belgium, France, Italy and Spain, 2006-2008	Vet Microbiol	378	16	France 07-08	220	125	57	57	serum	general	swine	H1N1, H1N2, H3N2	A,H1+H3	0	NA	farm	2007	2008	2	2010-2016	Pre-pdm09	France	Europe	547561	13487588	42560.4	66028467	20
103	90	Kyriakis	2013	Influenza A virus infection dynamics in swine farms in Belgium, France, Italy and Spain, 2006-2008	Vet Microbiol	379	17	France 08	220	86	39	39	serum	general	swine	H1N1, H1N2, H3N2	A,H1+H3	0	NA	farm	2008	2008	1	2010-2016	Pre-pdm09	France	Europe	547561	13487588	42560.4	66028467	20
104	90	Kyriakis	2013	Influenza A virus infection dynamics in swine farms in Belgium, France, Italy and Spain, 2006-2008	Vet Microbiol	380	18	France 08-09	220	125	57	57	serum	general	swine	H1N1, H1N2, H3N2	A,H1+H3	0	NA	farm	2008	2009	2	2010-2016	Pre-pdm09	France	Europe	547561	13487588	42560.4	66028467	20
105	90	Kyriakis	2013	Influenza A virus infection dynamics in swine farms in Belgium, France, Italy and Spain, 2006-2008	Vet Microbiol	381	19	Spain 06	237	226	95.4	95.4	serum	general	swine	H1N1, H1N2, H3N2	A,H1+H3	0	NA	farm	2006	2006	1	2010-2016	Pre-pdm09	Spain	Europe	498800	25494720	29882.1	46647421	55
106	90	Kyriakis	2013	Influenza A virus infection dynamics in swine farms in Belgium, France, Italy and Spain, 2006-2008	Vet Microbiol	382	20	Spain 06-07	210	139	66	66	serum	general	swine	H1N1, H1N2, H3N2	A,H1+H3	0	NA	farm	2006	2007	2	2010-2016	Pre-pdm09	Spain	Europe	498800	25494720	29882.1	46647421	55
107	90	Kyriakis	2013	Influenza A virus infection dynamics in swine farms in Belgium, France, Italy and Spain, 2006-2008	Vet Microbiol	383	21	Spain 07	210	155	74	74	serum	general	swine	H1N1, H1N2, H3N2	A,H1+H3	0	NA	farm	2007	2007	1	2010-2016	Pre-pdm09	Spain	Europe	498800	25494720	29882.1	46647421	55
108	90	Kyriakis	2013	Influenza A virus infection dynamics in swine farms in Belgium, France, Italy and Spain, 2006-2008	Vet Microbiol	384	22	Spain 07-08	210	164	78	78	serum	general	swine	H1N1, H1N2, H3N2	A,H1+H3	0	NA	farm	2007	2008	2	2010-2016	Pre-pdm09	Spain	Europe	498800	25494720	29882.1	46647421	55
109	90	Kyriakis	2013	Influenza A virus infection dynamics in swine farms in Belgium, France, Italy and Spain, 2006-2008	Vet Microbiol	385	23	Spain 08	210	199	94.8	94.8	serum	general	swine	H1N1, H1N2, H3N2	A,H1+H3	0	NA	farm	2008	2008	1	2010-2016	Pre-pdm09	Spain	Europe	498800	25494720	29882.1	46647421	55
110	90	Kyriakis	2013	Influenza A virus infection dynamics in swine farms in Belgium, France, Italy and Spain, 2006-2008	Vet Microbiol	386	24	Spain 08-09	190	139	73	73	serum	general	swine	H1N1, H1N2, H3N2	A,H1+H3	0	NA	farm	2008	2009	2	2010-2016	Pre-pdm09	Spain	Europe	498800	25494720	29882.1	46647421	55
111	91	Kyriakis	2015	Serological Evidence of Pandemic H1N1 Influenza Virus Infections in Greek Swine	Zoonoses Public Health	311	1	2002-2004	432	227	52.5	52.5	serum	general	swine, human	influenza A	A,H1+H3	0	0	farm	2002	2004	3	2010-2016	Pre-pdm09	Greece	Europe	128900	1077000	21965.9	11032328	10
112	91	Kyriakis	2015	Serological Evidence of Pandemic H1N1 Influenza Virus Infections in Greek Swine	Zoonoses Public Health	312	2	2010-2012	476	231	48.5	48.5	serum	general	swine, human	influenza A	A,H1+H3	0	0	farm	2010	2012	3	2010-2016	Post-pdm09	Greece	Europe	128900	1077000	21965.9	11032328	10
113	92	Lange	2013	Reassortants of the pandemic (H1N1) 2009 virus and establishment of a novel porcine H1N2 influenza virus, lineage in Germany	Vet Microbiol	97	1	serology avH1N1	23116	12585	54.4	54.4	serum	diseased	swine	H1N1	H1	NA	1	other/NA	2009	2012	4	2010-2016	Post-pdm09	Germany	Europe	348540	27690100	46251.4	80621788	34
114	92	Lange	2013	Reassortants of the pandemic (H1N1) 2009 virus and establishment of a novel porcine H1N2 influenza virus, lineage in Germany	Vet Microbiol	97	3	serology pdmH1N1	23116	11086	48	48	serum	diseased	human	H1N1	H1	NA	1	other/NA	2009	2012	4	2010-2016	Post-pdm09	Germany	Europe	348540	27690100	46251.4	80621788	34
115	92	Lange	2013	Reassortants of the pandemic (H1N1) 2009 virus and establishment of a novel porcine H1N2 influenza virus, lineage in Germany	Vet Microbiol	97	4	serology huH1N2	23116	9566	41.4	41.4	serum	diseased	swine	H1N2	H1	NA	1	other/NA	2009	2012	4	2010-2016	Post-pdm09	Germany	Europe	348540	27690100	46251.4	80621788	34
116	92	Lange	2013	Reassortants of the pandemic (H1N1) 2009 virus and establishment of a novel porcine H1N2 influenza virus, lineage in Germany	Vet Microbiol	97	5	serology huH3N2	23116	12220	52.9	52.9	serum	diseased	swine	H3N2	H3	NA	1	other/NA	2009	2012	4	2010-2016	Post-pdm09	Germany	Europe	348540	27690100	46251.4	80621788	34
117	92	Lange	2013	Reassortants of the pandemic (H1N1) 2009 virus and establishment of a novel porcine H1N2 influenza virus, lineage in Germany	Vet Microbiol	98	2	serology pdmH1huN2	11395	3322	29.2	29.2	serum	diseased	swine	H1N2	H1	NA	1	other/NA	2012	2012	1	2010-2016	Post-pdm09	Germany	Europe	348540	27690100	46251.4	80621788	34
118	95	Lee	2009	Isolation and genetic characterization of H5N2 influenza viruses from pigs in Korea	J Virol	101	NA	NA	4108	35	0.85	0.9	serum	general	avian	H5N2	avian	NA	NA	farm	2006	2008	3	2005-2009	Pre-pdm09	South Korea	Asia	97350	9912204	25977	50219669	20
119	97	Li	2004	Serological and virologic surveillance of swine influenza in China from 2000 to 2003	International Congress Series	104	2	serology H1	4212	425	10.1	10.1	serum	general	swine	H1	H1	0	NA	farm	2000	2003	4	2000-2004	Pre-pdm09	China	Asia	9388211	482398000	6807.43	1357380000	36
120	97	Li	2004	Serological and virologic surveillance of swine influenza in China from 2000 to 2003	International Congress Series	104	3	serology H3	4212	1731	41.1	41.1	serum	general	swine	H3	H3	0	NA	farm	2000	2003	4	2000-2004	Pre-pdm09	China	Asia	9388211	482398000	6807.43	1357380000	36
121	97	Li	2004	Serological and virologic surveillance of swine influenza in China from 2000 to 2003	International Congress Series	105	4	serology H5	2881	36	1.2	1.2	serum	general	avian	H5	avian	0	NA	farm	2002	2003	2	2000-2004	Pre-pdm09	China	Asia	9388211	482398000	6807.43	1357380000	36
122	97	Li	2004	Serological and virologic surveillance of swine influenza in China from 2000 to 2003	International Congress Series	105	5	serology H9	2881	60	2.1	2.1	serum	general	avian	H9	avian	0	NA	farm	2002	2003	2	2000-2004	Pre-pdm09	China	Asia	9388211	482398000	6807.43	1357380000	36
123	98	Li	2015	Avian influenza H9N2 seroprevalence among pig population and pig farm staff in Shandong, China	Virol J	313	NA	NA	2176	106	4.87	4.9	serum	general	avian	H9N2	avian	0	0	farm	2013	2014	2	2010-2016	Post-pdm09	China	Asia	9388211	482398000	6807.43	1357380000	36
124	100	Liu	2014	First report of seroprevalence of swine influenza A virus in Tibetan pigs in Tibet, China	Trop Anim Health Prod	106	NA	NA	421	253	NA	60.1	serum	general	swine	H1N1, H3N2	A,H1+H3	NA	0	other/NA	2010	2010	1	2010-2016	Post-pdm09	China	Asia	9388211	482398000	6807.43	1357380000	36
125	101	Loeffen	1999	Survey of infectious agents involved in acute respiratory disease in finishing pigs	Vet Rec	108	2	serology H1	400	327	82	81.8	serum	diseased	swine	H1	H1	NA	1	farm	1995	1996	2	1995-1999	Pre-pdm09	Netherlands	Europe	33720	12212300	50792.5	16804224	73
126	101	Loeffen	1999	Survey of infectious agents involved in acute respiratory disease in finishing pigs	Vet Rec	108	3	serology H3	400	222	56	55.5	serum	diseased	swine	H3	H3	NA	1	farm	1995	1996	2	1995-1999	Pre-pdm09	Netherlands	Europe	33720	12212300	50792.5	16804224	73
127	102	Lopez-Robles	2014	Serological and molecular prevalence of swine influenza virus on farms in northwestern Mexico	Vet Microbiol	109	1	serology	150	114	76	76	serum	general	swine	H1N1, H3N2	A,H1+H3	0	NA	farm	2008	2009	2	2010-2016	Pre-pdm09	Mexico	Latin America	1943950	16201625	10307.3	122332399	13
128	104	Lutteke	2014	Neutralizing antibodies against influenza A in pigs before and after the 2009 pandemic, Luxembourg	Vet Microbiol	113	1	2009	203	139	68.5	68.5	serum	general	swine, human	H1N1, H1N2, H3N2	A,H1+H3	NA	NA	farm	2009	2009	1	2010-2016	Post-pdm09	Luxembourg	Europe	2590	87518	110665	543202	16
129	104	Lutteke	2014	Neutralizing antibodies against influenza A in pigs before and after the 2009 pandemic, Luxembourg	Vet Microbiol	114	2	2012	287	152	53	53	serum	general	swine, human	H1N1, H1N2, H3N2	A,H1+H3	NA	NA	farm	2012	2012	1	2010-2016	Post-pdm09	Luxembourg	Europe	2590	87518	110665	543202	16
130	105	Ma	2007	Identification of H2N3 influenza A viruses from swine in the United States	Proc Natl Acad Sci U S A	115	NA	NA	180	81	NA	45	serum	diseased	avian-like swine	H2N3	avian	NA	1	farm	2006	2007	2	2005-2009	Pre-pdm09	USA	North America	9147420	64775000	53042	316128839	20
131	109	Maldonado	2006	Evidence of the concurrent circulation of H1N2, H1N1 and H3N2 influenza A viruses in densely populated pig areas in Spain	Vet J	119	1	serology	600	458	76.3	76.3	serum	general	swine	H1N1, H1N2, H3N2	A,H1+H3	0	NA	farm	2003	2003	1	2005-2009	Pre-pdm09	Spain	Europe	498800	25494720	29882.1	46647421	55
132	110	Markowska-Daniel	2005	Seroprevalence of antibodies against swine influenza virus in pigs of different age	Bulletin of the Veterinary Institute in Pulawy	123	1	Poland H1N1	2088	204	9.7	9.8	serum	general	swine	H1N1	H1	0	NA	farm	2005	2005	1	2005-2009	Pre-pdm09	Poland	Europe	306220	11162472	13653.7	38530725	29
133	110	Markowska-Daniel	2005	Seroprevalence of antibodies against swine influenza virus in pigs of different age	Bulletin of the Veterinary Institute in Pulawy	123	2	Poland H1N2	2088	61	2.9	2.9	serum	general	swine	H1N2	H1	0	NA	farm	2005	2005	1	2005-2009	Pre-pdm09	Poland	Europe	306220	11162472	13653.7	38530725	29
134	110	Markowska-Daniel	2005	Seroprevalence of antibodies against swine influenza virus in pigs of different age	Bulletin of the Veterinary Institute in Pulawy	123	3	Poland H3N2	2088	37	1.8	1.8	serum	general	swine	H3N2	H3	0	NA	farm	2005	2005	1	2005-2009	Pre-pdm09	Poland	Europe	306220	11162472	13653.7	38530725	29
135	110	Markowska-Daniel	2005	Seroprevalence of antibodies against swine influenza virus in pigs of different age	Bulletin of the Veterinary Institute in Pulawy	124	4	Lithuania H1N1	647	19	2.9	2.9	serum	general	swine	H1N1	H1	0	NA	farm	2005	2005	1	2005-2009	Pre-pdm09	Lithuania	Europe	62674	807500	15529.7	2956121	27
136	110	Markowska-Daniel	2005	Seroprevalence of antibodies against swine influenza virus in pigs of different age	Bulletin of the Veterinary Institute in Pulawy	124	5	Lithuania H1N2	647	10	1.5	1.5	serum	general	swine	H1N2	H1	0	NA	farm	2005	2005	1	2005-2009	Pre-pdm09	Lithuania	Europe	62674	807500	15529.7	2956121	27
137	110	Markowska-Daniel	2005	Seroprevalence of antibodies against swine influenza virus in pigs of different age	Bulletin of the Veterinary Institute in Pulawy	124	6	Lithuania H3N2	647	0	0	0	serum	general	swine	H3N2	H3	0	NA	farm	2005	2005	1	2005-2009	Pre-pdm09	Lithuania	Europe	62674	807500	15529.7	2956121	27
138	111	Markowska-Daniel	2012	Serological evidence of co-circulation of different subtypes of swine influenza virus in Polish pig herds	Bulletin of the Veterinary Institute in Pulawy	121	1	passive serosurvey	11170	7127	63.8	63.8	serum	general	swine	H1N1, H1N2, H3N2	A,H1+H3	0	NA	slaughterhouse	2010	2012	3	2010-2016	Post-pdm09	Poland	Europe	306220	11162472	13653.7	38530725	29
139	111	Markowska-Daniel	2012	Serological evidence of co-circulation of different subtypes of swine influenza virus in Polish pig herds	Bulletin of the Veterinary Institute in Pulawy	122	2	active monitoring H1N1	388	110	NA	28.4	serum	general	swine	H1N1	H1	0	NA	farm	2011	2012	2	2010-2016	Post-pdm09	Poland	Europe	306220	11162472	13653.7	38530725	29
140	111	Markowska-Daniel	2012	Serological evidence of co-circulation of different subtypes of swine influenza virus in Polish pig herds	Bulletin of the Veterinary Institute in Pulawy	122	3	active monitoring H1N2	388	97	NA	25	serum	general	swine	H1N2	H1	0	NA	farm	2011	2012	2	2010-2016	Post-pdm09	Poland	Europe	306220	11162472	13653.7	38530725	29
141	111	Markowska-Daniel	2012	Serological evidence of co-circulation of different subtypes of swine influenza virus in Polish pig herds	Bulletin of the Veterinary Institute in Pulawy	122	4	active monitoring H3N2	388	159	NA	41	serum	general	swine	H3N2	H3	0	NA	farm	2011	2012	2	2010-2016	Post-pdm09	Poland	Europe	306220	11162472	13653.7	38530725	29
142	112	Mastin	2011	Prevalence and risk factors for swine influenza virus infection in the English pig population	PLoS Curr	125	NA	NA	2745	334	NA	12.2	serum	general	swine	H1N1, H1N2, H3N2	A,H1+H3	NA	NA	farm	2008	2009	2	2010-2016	Pre-pdm09	UK	Europe	241930	4885000	41781.1	64097085	8
143	116	Meseko	2014	Influenza infections in live pig market, Nigeria	International Journal of Infectious Diseases	128	NA	NA	268	94	35	35.1	serum	general	influenza A	influenza A	A,H1+H3	NA	NA	other/NA	2013	2013	1	2010-2016	Post-pdm09	Nigeria	Africa	910770	8080000	3005.51	173615345	5
144	117	Meyns	2011	A cross-sectional study of risk factors associated with pulmonary lesions in pigs at slaughter	Vet J	154	NA	NA	1000	810	81	81	serum	general	swine	H1N1, H1N2, H3N2	A,H1+H3	1	2	slaughterhouse	2007	2007	1	2010-2016	Pre-pdm09	Belgium	Europe	30280	6592978	46929.6	11195138	59
145	118	Monger	2014	Seroprevalence and associated risk factors of important pig viral diseases in Bhutan	Prev Vet Med	129	1	government breeding farms	376	185	NA	49.2	serum	general	influenza A	influenza A	A,H1+H3	0	NA	farm	2011	2012	2	2010-2016	Post-pdm09	Bhutan	Asia	38117	15373	2362.58	753947	2
146	118	Monger	2014	Seroprevalence and associated risk factors of important pig viral diseases in Bhutan	Prev Vet Med	130	2	village backyard farms	465	55	NA	11.8	serum	general	influenza A	influenza A	A,H1+H3	0	NA	farm	2011	2012	2	2010-2016	Post-pdm09	Bhutan	Asia	38117	15373	2362.58	753947	2
147	126	Nidom	2010	Influenza A (H5N1) viruses from pigs, Indonesia	Emerg Infect Dis	138	2	serology	300	3	1	1	serum	general	avian	H5N1	avian	NA	0	other/NA	2008	2009	2	2010-2016	Pre-pdm09	Indonesia	Asia	1811570	8246000	3475.25	249865631	3
148	127	Ninomiya	2002	Seroepidemiological evidence of avian H4, H5, and H9 influenza A virus transmission to pigs in southeastern China	Vet Microbiol	283	1	H1	101	33	NA	32.7	serum	general	swine	H1N1	H1	NA	0	slaughterhouse	1998	1998	1	2000-2004	Pre-pdm09	China	Asia	9388211	482398000	6807.43	1357380000	36
149	127	Ninomiya	2002	Seroepidemiological evidence of avian H4, H5, and H9 influenza A virus transmission to pigs in southeastern China	Vet Microbiol	283	2	H3	101	22	NA	21.8	serum	general	human	H3N2	H3	NA	0	slaughterhouse	1998	1998	1	2000-2004	Pre-pdm09	China	Asia	9388211	482398000	6807.43	1357380000	36
150	127	Ninomiya	2002	Seroepidemiological evidence of avian H4, H5, and H9 influenza A virus transmission to pigs in southeastern China	Vet Microbiol	283	3	H4	101	9	NA	8.9	serum	general	avian	H4N6	avian	NA	0	slaughterhouse	1998	1998	1	2000-2004	Pre-pdm09	China	Asia	9388211	482398000	6807.43	1357380000	36
151	127	Ninomiya	2002	Seroepidemiological evidence of avian H4, H5, and H9 influenza A virus transmission to pigs in southeastern China	Vet Microbiol	283	4	H5	101	10	NA	9.9	serum	general	avian	H5N3	avian	NA	0	slaughterhouse	1998	1998	1	2000-2004	Pre-pdm09	China	Asia	9388211	482398000	6807.43	1357380000	36
152	127	Ninomiya	2002	Seroepidemiological evidence of avian H4, H5, and H9 influenza A virus transmission to pigs in southeastern China	Vet Microbiol	283	5	H9	101	7	NA	6.9	serum	general	avian	H9N2	avian	NA	0	slaughterhouse	1998	1998	1	2000-2004	Pre-pdm09	China	Asia	9388211	482398000	6807.43	1357380000	36
153	128	Njabo	2012	Pandemic A/H1N1/2009 influenza virus in swine, Cameroon, 2010	Vet Microbiol	141	2	serology	98	27	28	27.6	serum	general	influenza A	influenza A	A,H1+H3	NA	2	other/NA	2009	2010	2	2010-2016	Post-pdm09	Cameroon	Africa	472710	1750000	1328.64	22253959	8
154	129	Nokireki	2013	The first detection of influenza in the Finnish pig population: a retrospective study	Acta Vet Scand	142	1	disease surveillance H1N1	3231	172	NA	5.3	serum	general	swine	H1N1	H1	NA	NA	slaughterhouse	2007	2009	3	2010-2016	Pre-pdm09	Finland	Europe	303890	1300385	49150.6	5439407	24
155	129	Nokireki	2013	The first detection of influenza in the Finnish pig population: a retrospective study	Acta Vet Scand	142	2	disease surveillance H1N2	3231	33	NA	1	serum	general	swine	H1N2	H1	NA	NA	slaughterhouse	2007	2009	3	2010-2016	Pre-pdm09	Finland	Europe	303890	1300385	49150.6	5439407	24
156	129	Nokireki	2013	The first detection of influenza in the Finnish pig population: a retrospective study	Acta Vet Scand	142	3	disease surveillance H3N2	3231	53	NA	1.6	serum	general	swine	H3N2	H3	NA	NA	slaughterhouse	2007	2009	3	2010-2016	Pre-pdm09	Finland	Europe	303890	1300385	49150.6	5439407	24
157	131	Nowotny	1994	Serological studies in Austrian fattening pigs with respiratory disorders	Acta Vet Hung	286	NA	NA	253	62	24.5	24.5	serum	diseased	swine	H1N1	H1	NA	1	other/NA	1992	1993	2	1990-1994	Pre-pdm09	Austria	Europe	82409	2983158	50510.7	8473786	35
158	133	Olsen	2000	Virologic and serologic surveillance for human, swine and avian influenza virus infections among pigs in the north-central United States	Arch Virol	151	1	serology CS H1N1	2375	657	27.7	27.7	serum	diseased	swine	H1N1	H1	NA	2	other/NA	1997	1998	2	2000-2004	Pre-pdm09	USA	North America	9147420	64775000	53042	316128839	20
159	133	Olsen	2000	Virologic and serologic surveillance for human, swine and avian influenza virus infections among pigs in the north-central United States	Arch Virol	151	2	serology avian H1N1	2375	180	7.6	7.6	serum	diseased	avian	H1N1	avian	NA	2	other/NA	1997	1998	2	2000-2004	Pre-pdm09	USA	North America	9147420	64775000	53042	316128839	20
160	133	Olsen	2000	Virologic and serologic surveillance for human, swine and avian influenza virus infections among pigs in the north-central United States	Arch Virol	151	3	serology human H3N2	2375	190	8	8	serum	diseased	human	H3N2	H3	NA	2	other/NA	1997	1998	2	2000-2004	Pre-pdm09	USA	North America	9147420	64775000	53042	316128839	20
161	134	Ouchi	1996	Large outbreak of swine influenza in southern Japan caused by reassortant (H1N2) influenza viruses: its epizootic background and characterization of the causative viruses	J Gen Virol	153	NA	NA	1512	1104	NA	73	serum	general	swine	H1N1, H3N2	A,H1+H3	NA	NA	other/NA	1990	1990	1	1995-1999	Pre-pdm09	Japan	Asia	364560	9685000	38633.7	127338621	8
162	138	Pascua	2008	Seroprevalence and genetic evolutions of swine influenza viruses under vaccination pressure in Korean swine herds	Virus Res	269	2	serology	6418	2959	46.1	46.1	serum	diseased	swine	H1N1, H1N2, H3N2, H3N1	A,H1+H3	0	1	farm	2002	2005	4	2005-2009	Pre-pdm09	South Korea	Asia	97350	9912204	25977	50219669	20
163	140	Peiris	2001	Cocirculation of avian H9N2 and contemporary "human" H3N2 influenza A viruses in pigs in southeastern China: potential for genetic reassortment?	J Virol	276	2	serology H9N2 Dk/HK/Y280/97	457	20	NA	4.4	serum	general	avian	H9N2	avian	NA	0	slaughterhouse	1998	2000	3	2000-2004	Pre-pdm09	China	Asia	9388211	482398000	6807.43	1357380000	36
164	140	Peiris	2001	Cocirculation of avian H9N2 and contemporary "human" H3N2 influenza A viruses in pigs in southeastern China: potential for genetic reassortment?	J Virol	276	3	serology H9N2 Sw/HK/9/98	457	10	NA	2.2	serum	general	avian-like swine	H9N2	avian	NA	0	slaughterhouse	1998	2000	3	2000-2004	Pre-pdm09	China	Asia	9388211	482398000	6807.43	1357380000	36
165	140	Peiris	2001	Cocirculation of avian H9N2 and contemporary "human" H3N2 influenza A viruses in pigs in southeastern China: potential for genetic reassortment?	J Virol	276	4	serology H9N2 neg strains	457	0	NA	0	serum	general	avian	H9N2	avian	NA	0	slaughterhouse	1998	2000	3	2000-2004	Pre-pdm09	China	Asia	9388211	482398000	6807.43	1357380000	36
166	140	Peiris	2001	Cocirculation of avian H9N2 and contemporary "human" H3N2 influenza A viruses in pigs in southeastern China: potential for genetic reassortment?	J Virol	276	5	serology H9N2 Ck/HK/G9/97	457	14	NA	3.1	serum	general	avian	H9N2	avian	NA	0	slaughterhouse	1998	2000	3	2000-2004	Pre-pdm09	China	Asia	9388211	482398000	6807.43	1357380000	36
167	140	Peiris	2001	Cocirculation of avian H9N2 and contemporary "human" H3N2 influenza A viruses in pigs in southeastern China: potential for genetic reassortment?	J Virol	276	6	serology H3N2 Sw/HK/2422/98	457	77	NA	16.8	serum	general	swine	H3N2	H3	NA	0	slaughterhouse	1998	2000	3	2000-2004	Pre-pdm09	China	Asia	9388211	482398000	6807.43	1357380000	36
168	143	Perera	2013	Swine influenza in Sri Lanka	Emerg Infect Dis	164	3	2004-2005 serology H3N2	300	185	61.6	61.7	serum	general	swine, human	H3N2	H3	NA	0	slaughterhouse	2004	2005	2	2010-2016	Pre-pdm09	Sri Lanka	Asia	62710	80471	3279.89	20483000	0
169	143	Perera	2013	Swine influenza in Sri Lanka	Emerg Infect Dis	164	4	2004-2005 serology H1N1	300	0	0	0	serum	general	swine, human	H1N1, H1N2	H1	NA	0	slaughterhouse	2004	2005	2	2010-2016	Pre-pdm09	Sri Lanka	Asia	62710	80471	3279.89	20483000	0
170	144	Perera	2014	Molecular epidemiology of influenza A(H1N1)pdm09 virus among humans and swine, Sri Lanka	Emerg Infect Dis	322	2	serology	3372	514	15.2	15.2	serum	general	swine, human	H1, H3	A,H1+H3	NA	0	slaughterhouse	2010	2013	4	2010-2016	Post-pdm09	Sri Lanka	Asia	62710	80471	3279.89	20483000	0
171	147	Pineyro	2010	Seroprevalence of the swine influenza virus in fattening pigs in Argentina in the 2002 season: evaluation by hemagglutination-inhibition and ELISA tests	Rev Argent Microbiol	167	NA	NA	355	354	NA	99.7	serum	general	human	H1N1, H3N2	A,H1+H3	0	0	farm	2002	2002	1	2010-2016	Pre-pdm09	Argentina	Latin America	2736690	2440000	14715.2	41446246	6
172	148	Poljak	2008	Investigation of exposure to swine influenza viruses in Ontario (Canada) finisher herds in 2004 and 2005	Prev Vet Med	171	1	2004 H1N1	920	123	13.4	13.4	serum	general	swine	H1N1	H1	NA	NA	farm	2004	2004	1	2005-2009	Pre-pdm09	Canada	North America	9093510	12879000	51964.3	35158304	37
173	148	Poljak	2008	Investigation of exposure to swine influenza viruses in Ontario (Canada) finisher herds in 2004 and 2005	Prev Vet Med	171	2	2004 H3N2	920	25	2.7	2.7	serum	general	swine	H3N2	H3	NA	NA	farm	2004	2004	1	2005-2009	Pre-pdm09	Canada	North America	9093510	12879000	51964.3	35158304	37
174	148	Poljak	2008	Investigation of exposure to swine influenza viruses in Ontario (Canada) finisher herds in 2004 and 2005	Prev Vet Med	172	3	2005 H1N1	978	146	14.9	14.9	serum	general	swine	H1N1	H1	NA	NA	farm	2005	2006	2	2005-2009	Pre-pdm09	Canada	North America	9093510	12879000	51964.3	35158304	37
175	148	Poljak	2008	Investigation of exposure to swine influenza viruses in Ontario (Canada) finisher herds in 2004 and 2005	Prev Vet Med	172	4	2005 H3N2	978	253	25.9	25.9	serum	general	swine	H3N2	H3	NA	NA	farm	2005	2006	2	2005-2009	Pre-pdm09	Canada	North America	9093510	12879000	51964.3	35158304	37
176	149	Poljak	2008	Prevalence of and risk factors for influenza in southern Ontario swine herds in 2001 and 2003	Can J Vet Res	170	3	2003 sows H3N2 CO	1140	7	0.6	0.6	serum	general	swine	H3N2	H3	0	NA	farm	2003	2003	1	2005-2009	Pre-pdm09	Canada	North America	9093510	12879000	51964.3	35158304	37
177	149	Poljak	2008	Prevalence of and risk factors for influenza in southern Ontario swine herds in 2001 and 2003	Can J Vet Res	170	4	2003 sows H3N2 TX	1140	8	0.7	0.7	serum	general	swine	H3N2	H3	0	NA	farm	2003	2003	1	2005-2009	Pre-pdm09	Canada	North America	9093510	12879000	51964.3	35158304	37
178	149	Poljak	2008	Prevalence of and risk factors for influenza in southern Ontario swine herds in 2001 and 2003	Can J Vet Res	293	5	2001 sows+finisher pig level	2020	969	NA	48	serum	general	swine	H1N1	H1	0	NA	farm	2001	2001	1	2005-2009	Pre-pdm09	Canada	North America	9093510	12879000	51964.3	35158304	37
179	151	Pospisil	2001	Swine influenza surveillance and the impact of human influenza epidemics on pig herds in the Czech Republic	Acta Veterinaria Brno	174	NA	NA	1353	0	NA	0	serum	diseased	swine, human	H1N1, H3N2	A,H1+H3	NA	2	other/NA	1995	2000	6	2000-2004	Pre-pdm09	Czech Republic	Europe	77230	1586627	19858.3	10521468	15
180	152	Pozzi	2010	Investigation of swine influenza sub-types H1N1, H32, N1N2 in pigs population in Israel (2002-2009)	Israel Journal of Veterinary Medicine	175	1	serology	306	0	NA	0	serum	general	swine	H1N1, H1N2, H3N2	A,H1+H3	NA	NA	farm	2002	2009	8	2010-2016	Pre-pdm09	Israel	Africa	21640	176900	36050.7	8059400	2
181	156	Rajao	2013	Serological evidence of swine influenza in Brazil	Influenza Other Respir Viruses	177	1	H1N1 swine	355	158	44.5	44.5	serum	general	swine	H1N1	H1	0	0	farm	2009	2009	1	2010-2016	Post-pdm09	Brazil	Latin America	8358140	36743593	11208.1	200361925	18
182	156	Rajao	2013	Serological evidence of swine influenza in Brazil	Influenza Other Respir Viruses	177	2	H1N1 human	355	136	38.3	38.3	serum	general	human	H1N1	H1	0	0	farm	2009	2009	1	2010-2016	Post-pdm09	Brazil	Latin America	8358140	36743593	11208.1	200361925	18
183	156	Rajao	2013	Serological evidence of swine influenza in Brazil	Influenza Other Respir Viruses	177	3	H3N2	355	36	10.1	10.1	serum	general	human	H3N2	H3	0	0	farm	2009	2009	1	2010-2016	Post-pdm09	Brazil	Latin America	8358140	36743593	11208.1	200361925	18
184	158	Regula	2000	Comparison of serologic testing and slaughter evaluation for assessing the effects of subclinical infection on growth in pigs	J Am Vet Med Assoc	387	1	8 week old	565	289	NA	51.2	serum	general	swine	H1N1	H1	0	0	farm	1996	1997	2	2000-2004	Pre-pdm09	USA	North America	9147420	64775000	53042	316128839	20
185	158	Regula	2000	Comparison of serologic testing and slaughter evaluation for assessing the effects of subclinical infection on growth in pigs	J Am Vet Med Assoc	388	2	16 week old	565	371	NA	65.7	serum	general	swine	H1N1	H1	0	0	farm	1996	1997	2	2000-2004	Pre-pdm09	USA	North America	9147420	64775000	53042	316128839	20
186	158	Regula	2000	Comparison of serologic testing and slaughter evaluation for assessing the effects of subclinical infection on growth in pigs	J Am Vet Med Assoc	389	3	24 week old	565	371	NA	65.7	serum	general	swine	H1N1	H1	0	0	farm	1996	1997	2	2000-2004	Pre-pdm09	USA	North America	9147420	64775000	53042	316128839	20
187	159	Regula	2003	The impact of endemic porcine reproductive and respiratory syndrome virus and other pathogens on reproductive performance in swine	Journal of Swine Health and Production	390	1	1996 visit 1	60	35	NA	58.3	serum	general	swine	H1N1	H1	0	0	farm	1996	1996	1	2000-2004	Pre-pdm09	USA	North America	9147420	64775000	53042	316128839	20
188	159	Regula	2003	The impact of endemic porcine reproductive and respiratory syndrome virus and other pathogens on reproductive performance in swine	Journal of Swine Health and Production	391	2	1996 visit 2	60	44	NA	73.3	serum	general	swine	H1N1	H1	0	0	farm	1996	1996	1	2000-2004	Pre-pdm09	USA	North America	9147420	64775000	53042	316128839	20
189	159	Regula	2003	The impact of endemic porcine reproductive and respiratory syndrome virus and other pathogens on reproductive performance in swine	Journal of Swine Health and Production	392	3	1997 visit 1	360	183	NA	50.8	serum	general	swine	H1N1	H1	0	0	farm	1997	1997	1	2000-2004	Pre-pdm09	USA	North America	9147420	64775000	53042	316128839	20
190	159	Regula	2003	The impact of endemic porcine reproductive and respiratory syndrome virus and other pathogens on reproductive performance in swine	Journal of Swine Health and Production	393	4	1997 visit 2	300	243	NA	81	serum	general	swine	H1N1	H1	0	0	farm	1997	1997	1	2000-2004	Pre-pdm09	USA	North America	9147420	64775000	53042	316128839	20
191	161	Rith	2013	Serologic evidence of human influenza virus infections in swine populations, Cambodia	Influenza Other Respir Viruses	134	1	human influenza	1147	171	14.9	14.9	serum	general	human	H1N1, H3N2	A,H1+H3	0	NA	other/NA	2006	2010	5	2010-2016	Pre-pdm09	Cambodia	Asia	176520	2150000	1006.84	15135169	14
192	161	Rith	2013	Serologic evidence of human influenza virus infections in swine populations, Cambodia	Influenza Other Respir Viruses	134	2	H5N1	150	0	0	0	serum	general	avian	H5N1	avian	0	NA	other/NA	2006	2010	5	2010-2016	Pre-pdm09	Cambodia	Asia	176520	2150000	1006.84	15135169	14
193	162	Saavedra-Montanez	2013	Retrospective serological survey of influenza viruses in backyard pigs from Mexico City	Influenza Other Respir Viruses	181	1	swH1N1	2094	1551	74	74.1	serum	general	swine	H1N1	H1	NA	0	farm	2000	2009	10	2010-2016	Pre-pdm09	Mexico	Latin America	1943950	16201625	10307.3	122332399	13
194	162	Saavedra-Montanez	2013	Retrospective serological survey of influenza viruses in backyard pigs from Mexico City	Influenza Other Respir Viruses	181	2	H1N1pdm09	2094	373	17.8	17.8	serum	general	human	H1N1	H1	NA	0	farm	2000	2009	10	2010-2016	Pre-pdm09	Mexico	Latin America	1943950	16201625	10307.3	122332399	13
195	162	Saavedra-Montanez	2013	Retrospective serological survey of influenza viruses in backyard pigs from Mexico City	Influenza Other Respir Viruses	181	3	hH1N1	2094	29	1.3	1.4	serum	general	human	H1N1	H1	NA	0	farm	2000	2009	10	2010-2016	Pre-pdm09	Mexico	Latin America	1943950	16201625	10307.3	122332399	13
196	162	Saavedra-Montanez	2013	Retrospective serological survey of influenza viruses in backyard pigs from Mexico City	Influenza Other Respir Viruses	181	4	swH3N2	2094	508	24.2	24.3	serum	general	swine	H3N2	H3	NA	0	farm	2000	2009	10	2010-2016	Pre-pdm09	Mexico	Latin America	1943950	16201625	10307.3	122332399	13
197	163	Sabale	2013	Seroprevalence of pandemic influenza H1N1 (2009) & seasonal influenza viruses in pigs in Maharashtra & Gujarat States, India, 2011	Indian J Med Res	182	NA	NA	925	504	NA	54.5	serum	general	human	H1N1, H3N2	A,H1+H3	0	0	slaughterhouse	2011	2011	1	2010-2016	Post-pdm09	India	Asia	2973190	10130000	1497.55	1252139596	1
198	169	Shieh	2008	Surveillance of avian and swine influenza in the swine population in Taiwan, 2004	J Microbiol Immunol Infect	185	1	serology	9883	3724	37.7	37.7	serum	general	swine	influenza A	A,H1+H3	NA	NA	farm	2004	2004	1	2005-2009	Pre-pdm09	Taiwan	Asia	36193	6300000	39600	23340000	27
199	171	Shin	2006	Isolation and characterization of novel H3N1 swine influenza viruses from pigs with respiratory diseases in Korea	J Clin Microbiol	188	NA	NA	60	52	86.6	86.7	serum	diseased	swine	H3N1	H3	NA	1	farm	2006	2006	1	2005-2009	Pre-pdm09	South Korea	Asia	97350	9912204	25977	50219669	20
200	172	Simon-Grife	2011	Seroprevalence and risk factors of swine influenza in Spain	Vet Microbiol	190	NA	NA	2151	1622	75.4	75.4	serum	general	swine	H1N1, H1N2, H3N2	A,H1+H3	1	2	farm	2008	2009	2	2010-2016	Pre-pdm09	Spain	Europe	498800	25494720	29882.1	46647421	55
201	173	Snoeck	2015	Serological evidence of pandemic (H1N1) 2009 virus in pigs, West and Central Africa	Vet Microbiol	327	1	Nigeria 2009 dsp	264	19	7.2	7.2	serum	general	swine, human	H1, H3	A,H1+H3	0	2	other/NA	2009	2009	1	2010-2016	Post-pdm09	Nigeria	Africa	910770	8080000	3005.51	173615345	5
202	173	Snoeck	2015	Serological evidence of pandemic (H1N1) 2009 virus in pigs, West and Central Africa	Vet Microbiol	328	8	Nigeria 2012 dsp	627	172	27.4	27.4	serum	general	swine, human	H1N1	H1	0	2	other/NA	2012	2012	1	2010-2016	Post-pdm09	Nigeria	Africa	910770	8080000	3005.51	173615345	5
203	173	Snoeck	2015	Serological evidence of pandemic (H1N1) 2009 virus in pigs, West and Central Africa	Vet Microbiol	329	12	Cameroom dsp1	197	25	NA	12.7	serum	general	swine, human	H1N1	H1	0	0	farm	2011	2011	1	2010-2016	Post-pdm09	Cameroon	Africa	472710	1750000	1328.64	22253959	8
204	173	Snoeck	2015	Serological evidence of pandemic (H1N1) 2009 virus in pigs, West and Central Africa	Vet Microbiol	329	13	Cameroom dsp2	197	12	NA	6.1	serum	general	swine, human	H1N1	H1	0	0	farm	2011	2011	1	2010-2016	Post-pdm09	Cameroon	Africa	472710	1750000	1328.64	22253959	8
205	173	Snoeck	2015	Serological evidence of pandemic (H1N1) 2009 virus in pigs, West and Central Africa	Vet Microbiol	329	14	Cameroom dsp3	197	48	NA	24.4	serum	general	swine, human	H1N1	H1	0	0	farm	2011	2011	1	2010-2016	Post-pdm09	Cameroon	Africa	472710	1750000	1328.64	22253959	8
206	175	Song	2010	Evidence of human-to-swine transmission of the pandemic (H1N1) 2009 influenza virus in South Korea	J Clin Microbiol	195	2	serology	1621	60	3.7	3.7	serum	general	human	H1N1	H1	1	NA	farm	2009	2009	1	2010-2016	Post-pdm09	South Korea	Asia	97350	9912204	25977	50219669	20
207	176	Song	2010	Serological surveillance of influenza A virus infection in swine populations in Fujian province, China: no evidence of naturally occurring H5N1 infection in pigs	Zoonoses Public Health	196	1	2004 H1, H3, H5, H9	499	490	NA	98.2	serum	general	swine, avian	influenza A	A,H1+H3	0	NA	farm	2004	2004	1	2010-2016	Pre-pdm09	China	Asia	9388211	482398000	6807.43	1357380000	36
208	176	Song	2010	Serological surveillance of influenza A virus infection in swine populations in Fujian province, China: no evidence of naturally occurring H5N1 infection in pigs	Zoonoses Public Health	196	2	2004 H5	499	0	0	0	serum	general	avian	H5N1	avian	0	NA	farm	2004	2004	1	2010-2016	Pre-pdm09	China	Asia	9388211	482398000	6807.43	1357380000	36
209	176	Song	2010	Serological surveillance of influenza A virus infection in swine populations in Fujian province, China: no evidence of naturally occurring H5N1 infection in pigs	Zoonoses Public Health	196	3	2004 H9	499	5	1	1	serum	general	avian	H9N2	avian	0	NA	farm	2004	2004	1	2010-2016	Pre-pdm09	China	Asia	9388211	482398000	6807.43	1357380000	36
210	176	Song	2010	Serological surveillance of influenza A virus infection in swine populations in Fujian province, China: no evidence of naturally occurring H5N1 infection in pigs	Zoonoses Public Health	197	4	2007 H1, H3, H5, H9	908	433	NA	47.7	serum	general	swine, avian	influenza A	A,H1+H3	0	NA	farm	2007	2007	1	2010-2016	Pre-pdm09	China	Asia	9388211	482398000	6807.43	1357380000	36
211	176	Song	2010	Serological surveillance of influenza A virus infection in swine populations in Fujian province, China: no evidence of naturally occurring H5N1 infection in pigs	Zoonoses Public Health	197	5	2007 H5	908	0	0	0	serum	general	avian	H5N1	avian	0	NA	farm	2007	2007	1	2010-2016	Pre-pdm09	China	Asia	9388211	482398000	6807.43	1357380000	36
212	176	Song	2010	Serological surveillance of influenza A virus infection in swine populations in Fujian province, China: no evidence of naturally occurring H5N1 infection in pigs	Zoonoses Public Health	197	6	2007 H9	908	24	2.6	2.6	serum	general	avian	H9N2	avian	0	NA	farm	2007	2007	1	2010-2016	Pre-pdm09	China	Asia	9388211	482398000	6807.43	1357380000	36
213	178	Sreta	2013	Retrospective swine influenza serological surveillance in the four highest pig density provinces of Thailand before the introduction of the 2009 pandemic Influenza A virus subtype H1N1 using various antibody detection assays	J Vet Diagn Invest	198	1	swH3N2-07	850	726	85.4	85.4	serum	diseased	swine	H3N2	H3	0	1	farm	2008	2009	2	2010-2016	Pre-pdm09	Thailand	Asia	510890	7923654	5778.98	67010502	12
214	178	Sreta	2013	Retrospective swine influenza serological surveillance in the four highest pig density provinces of Thailand before the introduction of the 2009 pandemic Influenza A virus subtype H1N1 using various antibody detection assays	J Vet Diagn Invest	198	2	swH3N2-05	850	134	15.8	15.8	serum	diseased	swine	H3N2	H3	0	1	farm	2008	2009	2	2010-2016	Pre-pdm09	Thailand	Asia	510890	7923654	5778.98	67010502	12
215	178	Sreta	2013	Retrospective swine influenza serological surveillance in the four highest pig density provinces of Thailand before the introduction of the 2009 pandemic Influenza A virus subtype H1N1 using various antibody detection assays	J Vet Diagn Invest	198	3	swH1N1-06	850	426	50.1	50.1	serum	diseased	swine	H1N1	H1	0	1	farm	2008	2009	2	2010-2016	Pre-pdm09	Thailand	Asia	510890	7923654	5778.98	67010502	12
216	178	Sreta	2013	Retrospective swine influenza serological surveillance in the four highest pig density provinces of Thailand before the introduction of the 2009 pandemic Influenza A virus subtype H1N1 using various antibody detection assays	J Vet Diagn Invest	198	4	swH1N1-09	850	158	18.6	18.6	serum	diseased	swine	H1N1	H1	0	1	farm	2008	2009	2	2010-2016	Pre-pdm09	Thailand	Asia	510890	7923654	5778.98	67010502	12
217	180	Su	2013	Seroepidemiological evidence of avian influenza A virus transmission to pigs in southern China	J Clin Microbiol	202	1	SIV H1N1	1080	380	35.2	35.2	serum	general	swine	H1N1	H1	NA	NA	farm	2010	2012	3	2010-2016	Post-pdm09	China	Asia	9388211	482398000	6807.43	1357380000	36
218	180	Su	2013	Seroepidemiological evidence of avian influenza A virus transmission to pigs in southern China	J Clin Microbiol	202	2	SIV H3N2	1080	213	19.7	19.7	serum	general	swine	H3N2	H3	NA	NA	farm	2010	2012	3	2010-2016	Post-pdm09	China	Asia	9388211	482398000	6807.43	1357380000	36
219	180	Su	2013	Seroepidemiological evidence of avian influenza A virus transmission to pigs in southern China	J Clin Microbiol	202	3	avian H3N2	1080	10	0.93	0.9	serum	general	avian-like swine	H3N2	avian	NA	NA	farm	2010	2012	3	2010-2016	Post-pdm09	China	Asia	9388211	482398000	6807.43	1357380000	36
220	180	Su	2013	Seroepidemiological evidence of avian influenza A virus transmission to pigs in southern China	J Clin Microbiol	202	4	avian H4N8	1080	17	1.6	1.6	serum	general	avian-like swine	H4N8	avian	NA	NA	farm	2010	2012	3	2010-2016	Post-pdm09	China	Asia	9388211	482398000	6807.43	1357380000	36
221	180	Su	2013	Seroepidemiological evidence of avian influenza A virus transmission to pigs in southern China	J Clin Microbiol	202	5	avian H5N1	1080	0	0	0	serum	general	avian	H5N1	avian	NA	NA	farm	2010	2012	3	2010-2016	Post-pdm09	China	Asia	9388211	482398000	6807.43	1357380000	36
222	180	Su	2013	Seroepidemiological evidence of avian influenza A virus transmission to pigs in southern China	J Clin Microbiol	202	6	avian H6N6	1080	19	1.8	1.8	serum	general	avian-like swine	H6N6	avian	NA	NA	farm	2010	2012	3	2010-2016	Post-pdm09	China	Asia	9388211	482398000	6807.43	1357380000	36
223	180	Su	2013	Seroepidemiological evidence of avian influenza A virus transmission to pigs in southern China	J Clin Microbiol	203	7	avian viruses	550	0	0	0	serum	general	avian, avian-like swine	H3N2, H4N8, H5N1, H6N6	avian	NA	0	other/NA	2001	2001	1	2010-2016	Pre-pdm09	China	Asia	9388211	482398000	6807.43	1357380000	36
224	182	Suriya	2008	Seroprevalence and risk factors for influenza A viruses in pigs in Peninsular Malaysia	Zoonoses Public Health	204	1	serology H1N1, H3N2	727	148	NA	20.4	serum	general	swine	H1N1, H3N2	A,H1+H3	0	0	farm	2005	2005	1	2005-2009	Pre-pdm09	Malaysia	Asia	328550	1816660	10538.1	29716965	6
225	183	Tinoco	2016	Transmission dynamics of pandemic influenza A(H1N1)pdm09 virus in humans and swine in backyard farms in Tumbes, Peru	Influenza Other Respir Viruses	332	1	sero pre-pandemic	310	0	0	0	serum	general	swine, human	H1	H1	0	0	farm	2009	2009	1	2010-2016	Post-pdm09	Peru	Latin America	1280000	3132335	6661.59	30375603	10
226	183	Tinoco	2016	Transmission dynamics of pandemic influenza A(H1N1)pdm09 virus in humans and swine in backyard farms in Tumbes, Peru	Influenza Other Respir Viruses	333	2	sero peak-pandemic	322	27	8	8.4	serum	general	swine, human	H1	H1	0	0	farm	2009	2009	1	2010-2016	Post-pdm09	Peru	Latin America	1280000	3132335	6661.59	30375603	10
227	183	Tinoco	2016	Transmission dynamics of pandemic influenza A(H1N1)pdm09 virus in humans and swine in backyard farms in Tumbes, Peru	Influenza Other Respir Viruses	334	3	sero 1st post-pandemic	328	79	24	24.1	serum	general	swine, human	H1	H1	0	0	farm	2010	2010	1	2010-2016	Post-pdm09	Peru	Latin America	1280000	3132335	6661.59	30375603	10
228	183	Tinoco	2016	Transmission dynamics of pandemic influenza A(H1N1)pdm09 virus in humans and swine in backyard farms in Tumbes, Peru	Influenza Other Respir Viruses	335	4	sero 2nd post-pandemic	343	4	1.2	1.2	serum	general	swine, human	H1	H1	0	0	farm	2011	2011	1	2010-2016	Post-pdm09	Peru	Latin America	1280000	3132335	6661.59	30375603	10
229	184	Trevennec	2011	Swine influenza in Vietnam: preliminary results of epidemiological studies	Influenza Other Respir Viruses	208	1	serology	609	22	3.62	3.6	serum	general	influenza A	influenza A	A,H1+H3	0	NA	farm	2009	2009	1	2010-2016	Post-pdm09	Vietnam	Asia	310070	26261400	1910.51	89708900	29
230	185	Trevennec	2012	Evidence for freedom from swine influenza in a remote area of Northern Vietnam	Acta Trop	207	NA	NA	519	2	NA	0.4	serum	general	influenza A	influenza A	A,H1+H3	NA	NA	farm	2005	2006	2	2010-2016	Pre-pdm09	Vietnam	Asia	310070	26261400	1910.51	89708900	29
231	186	Trevennec	2012	Transmission of pandemic influenza H1N1 (2009) in Vietnamese swine in 2009-2010	Influenza Other Respir Viruses	270	2	serology SH	459	97	21	21.1	serum	general	human	H1N1	H1	0	0	slaughterhouse	2009	2010	2	2010-2016	Post-pdm09	Vietnam	Asia	310070	26261400	1910.51	89708900	29
232	189	Van Reeth	2000	Isolations of H1N2 influenza A virus from pigs in Belgium	Influenza Other Respir Viruses	221	2	serology H1N2	443	305	68.8	68.8	serum	general	swine	H1N2	H1	NA	NA	farm	1999	1999	1	2000-2004	Pre-pdm09	Belgium	Europe	30280	6592978	46929.6	11195138	59
233	190	Van Reeth	2008	Seroprevalence of H1N1, H3N2 and H1N2 influenza viruses in pigs in seven European countries in 2002-2003	Influenza Other Respir Viruses	213	1	Belgium	600	564	94	94	serum	general	swine	H1N1, H1N2, H3N2	A,H1+H3	0	NA	farm	2002	2003	2	2005-2009	Pre-pdm09	Belgium	Europe	30280	6592978	46929.6	11195138	59
234	190	Van Reeth	2008	Seroprevalence of H1N1, H3N2 and H1N2 influenza viruses in pigs in seven European countries in 2002-2003	Influenza Other Respir Viruses	214	2	Germany	811	691	85.2	85.2	serum	general	swine	H1N1, H1N2, H3N2	A,H1+H3	0	NA	farm	2002	2003	2	2005-2009	Pre-pdm09	Germany	Europe	348540	27690100	46251.4	80621788	34
235	190	Van Reeth	2008	Seroprevalence of H1N1, H3N2 and H1N2 influenza viruses in pigs in seven European countries in 2002-2003	Influenza Other Respir Viruses	215	3	Italy	456	286	62.7	62.7	serum	general	swine	H1N1, H1N2, H3N2	A,H1+H3	0	NA	farm	2002	2003	2	2005-2009	Pre-pdm09	Italy	Europe	294140	8661500	35685.6	59831093	14
236	190	Van Reeth	2008	Seroprevalence of H1N1, H3N2 and H1N2 influenza viruses in pigs in seven European countries in 2002-2003	Influenza Other Respir Viruses	216	4	Spain	600	475	79.2	79.2	serum	general	swine	H1N1, H1N2, H3N2	A,H1+H3	0	NA	farm	2002	2003	2	2005-2009	Pre-pdm09	Spain	Europe	498800	25494720	29882.1	46647421	55
237	190	Van Reeth	2008	Seroprevalence of H1N1, H3N2 and H1N2 influenza viruses in pigs in seven European countries in 2002-2003	Influenza Other Respir Viruses	217	5	Czech Republic	555	72	13	13	serum	general	swine	H1N1, H1N2, H3N2	A,H1+H3	0	NA	farm	2002	2003	2	2005-2009	Pre-pdm09	Czech Republic	Europe	77230	1586627	19858.3	10521468	15
238	190	Van Reeth	2008	Seroprevalence of H1N1, H3N2 and H1N2 influenza viruses in pigs in seven European countries in 2002-2003	Influenza Other Respir Viruses	218	6	Ireland	527	112	21.2	21.3	serum	general	swine	H1N1, H1N2, H3N2	A,H1+H3	0	NA	farm	2002	2003	2	2005-2009	Pre-pdm09	Ireland	Europe	68890	1552000	50478.4	4595281	34
239	190	Van Reeth	2008	Seroprevalence of H1N1, H3N2 and H1N2 influenza viruses in pigs in seven European countries in 2002-2003	Influenza Other Respir Viruses	219	7	Poland	641	51	8	8	serum	general	swine	H1N1, H1N2, H3N2	A,H1+H3	0	NA	farm	2002	2003	2	2005-2009	Pre-pdm09	Poland	Europe	306220	11162472	13653.7	38530725	29
240	191	Vijaykrishna	2011	Long-term evolution and transmission dynamics of swine influenza A virus	Nature	222	1	serology H1 2000	221	92	41.8	41.8	serum	general	swine, human	H1N1, H1N2	H1	NA	NA	slaughterhouse	2000	2000	1	2010-2016	Pre-pdm09	China	Asia	9388211	482398000	6807.43	1357380000	36
241	191	Vijaykrishna	2011	Long-term evolution and transmission dynamics of swine influenza A virus	Nature	222	5	serology H3 2000	221	42	19	19	serum	general	swine	H3N2	H3	NA	NA	slaughterhouse	2000	2000	1	2010-2016	Pre-pdm09	China	Asia	9388211	482398000	6807.43	1357380000	36
242	191	Vijaykrishna	2011	Long-term evolution and transmission dynamics of swine influenza A virus	Nature	222	7	serology H3 Victoria 2000	221	6	2.5	2.5	serum	general	swine	H3N2	H3	NA	NA	slaughterhouse	2000	2000	1	2010-2016	Pre-pdm09	China	Asia	9388211	482398000	6807.43	1357380000	36
243	191	Vijaykrishna	2011	Long-term evolution and transmission dynamics of swine influenza A virus	Nature	223	2	serology H1 2004	240	128	53.3	53.3	serum	general	swine, human	H1N1, H1N2	H1	NA	NA	slaughterhouse	2004	2004	1	2010-2016	Pre-pdm09	China	Asia	9388211	482398000	6807.43	1357380000	36
244	191	Vijaykrishna	2011	Long-term evolution and transmission dynamics of swine influenza A virus	Nature	224	3	serology H1 2009	360	222	61.7	61.7	serum	general	swine, human	H1N1, H1N2	H1	NA	NA	slaughterhouse	2009	2009	1	2010-2016	Post-pdm09	China	Asia	9388211	482398000	6807.43	1357380000	36
245	191	Vijaykrishna	2011	Long-term evolution and transmission dynamics of swine influenza A virus	Nature	224	8	serology H5	360	0	0	0	serum	general	avian	H5N1	avian	NA	NA	slaughterhouse	2009	2009	1	2010-2016	Post-pdm09	China	Asia	9388211	482398000	6807.43	1357380000	36
246	191	Vijaykrishna	2011	Long-term evolution and transmission dynamics of swine influenza A virus	Nature	225	4	serology H1 2010	170	101	59.4	59.4	serum	general	swine, human	H1N1, H1N2	H1	NA	NA	slaughterhouse	2010	2010	1	2010-2016	Post-pdm09	China	Asia	9388211	482398000	6807.43	1357380000	36
247	191	Vijaykrishna	2011	Long-term evolution and transmission dynamics of swine influenza A virus	Nature	225	6	serology H3 2010	170	0	0	0	serum	general	swine	H3N2	H3	NA	NA	slaughterhouse	2010	2010	1	2010-2016	Post-pdm09	China	Asia	9388211	482398000	6807.43	1357380000	36
248	193	Wang	2016	Infectivity and Transmissibility of Avian H9N2 Influenza Viruses in Pigs	J Virol	339	NA	NA	2500	389	15.6	15.6	serum	general	avian	H9N2	avian	NA	0	slaughterhouse	2010	2012	3	2010-2016	Post-pdm09	China	Asia	9388211	482398000	6807.43	1357380000	36
249	195	Webby	2000	Evolution of swine H3N2 influenza viruses in the United States	J Virol	229	1	H1N1, H3N2 pig level	4382	1709	NA	39	serum	general	swine	H1N1, H3N2	A,H1+H3	1	NA	other/NA	1998	1999	2	2000-2004	Pre-pdm09	USA	North America	9147420	64775000	53042	316128839	20
250	197	Wellenberg	2010	A study on the severity and relevance of porcine circovirus type 2 infections in Dutch fattening pigs with respiratory diseases	Vet Microbiol	231	1	H1N1	818	333	NA	40.7	serum	general	swine	H1N1	H1	0	NA	farm	2007	2007	1	2010-2016	Pre-pdm09	Netherlands	Europe	33720	12212300	50792.5	16804224	73
251	197	Wellenberg	2010	A study on the severity and relevance of porcine circovirus type 2 infections in Dutch fattening pigs with respiratory diseases	Vet Microbiol	231	2	H1N2	818	215	NA	26.3	serum	general	swine	H1N2	H1	0	NA	farm	2007	2007	1	2010-2016	Pre-pdm09	Netherlands	Europe	33720	12212300	50792.5	16804224	73
252	197	Wellenberg	2010	A study on the severity and relevance of porcine circovirus type 2 infections in Dutch fattening pigs with respiratory diseases	Vet Microbiol	231	3	H3N2	818	395	NA	48.3	serum	general	swine	H3N2	H3	0	NA	farm	2007	2007	1	2010-2016	Pre-pdm09	Netherlands	Europe	33720	12212300	50792.5	16804224	73
253	201	Wu	2011	Serological and virological surveillance of swine H1N1 and H3N2 influenza virus infection in two farms located in Hubei province, central China	Zoonoses Public Health	235	1	serology H1N1	480	204	42.5	42.5	serum	general	swine	H1N1	H1	NA	0	farm	2008	2009	2	2010-2016	Pre-pdm09	China	Asia	9388211	482398000	6807.43	1357380000	36
254	201	Wu	2011	Serological and virological surveillance of swine H1N1 and H3N2 influenza virus infection in two farms located in Hubei province, central China	Zoonoses Public Health	235	2	serology H3N2	480	38	7.9	7.9	serum	general	swine	H3N2	H3	NA	0	farm	2008	2009	2	2010-2016	Pre-pdm09	China	Asia	9388211	482398000	6807.43	1357380000	36
255	204	Yaeger	2009	Survey of disease pressures in twenty-six niche herds in the midwestern United States	Journal of Swine Health and Production	239	1	serology	602	415	68.9	68.9	serum	general	swine	H1N1, H3N2	A,H1+H3	1	NA	farm	2006	2007	2	2005-2009	Pre-pdm09	USA	North America	9147420	64775000	53042	316128839	20
256	205	Yan	2012	Pandemic (H1N1) 2009 virus circulating in pigs, Guangxi, China	Emerg Infect Dis	247	3	surveillance sero H1N1pdm09	1000	251	NA	25.1	serum	general	human	H1N1	H1	NA	NA	slaughterhouse	2011	2011	1	2010-2016	Post-pdm09	China	Asia	9388211	482398000	6807.43	1357380000	36
257	205	Yan	2012	Pandemic (H1N1) 2009 virus circulating in pigs, Guangxi, China	Emerg Infect Dis	247	4	surveillance sero H1N1 SIV	1000	248	NA	24.8	serum	general	swine	H1N1	H1	NA	NA	slaughterhouse	2011	2011	1	2010-2016	Post-pdm09	China	Asia	9388211	482398000	6807.43	1357380000	36
258	206	Yang	2012	Human infection from avian-like influenza A (H1N1) viruses in pigs, China	Emerg Infect Dis	249	2	serology av-like H1N1	20	11	55	55	serum	general	swine	H1N1	H1	NA	NA	other/NA	2011	2011	1	2010-2016	Post-pdm09	China	Asia	9388211	482398000	6807.43	1357380000	36
259	206	Yang	2012	Human infection from avian-like influenza A (H1N1) viruses in pigs, China	Emerg Infect Dis	249	3	serology classical H1N1	20	5	25	25	serum	general	swine	H1N1	H1	NA	NA	other/NA	2011	2011	1	2010-2016	Post-pdm09	China	Asia	9388211	482398000	6807.43	1357380000	36
260	206	Yang	2012	Human infection from avian-like influenza A (H1N1) viruses in pigs, China	Emerg Infect Dis	249	4	serology H1N1pdm09	20	6	30	30	serum	general	human	H1N1	H1	NA	NA	other/NA	2011	2011	1	2010-2016	Post-pdm09	China	Asia	9388211	482398000	6807.43	1357380000	36
261	206	Yang	2012	Human infection from avian-like influenza A (H1N1) viruses in pigs, China	Emerg Infect Dis	249	5	serology H3N2	20	2	10	10	serum	general	swine	H3N2	H3	NA	NA	other/NA	2011	2011	1	2010-2016	Post-pdm09	China	Asia	9388211	482398000	6807.43	1357380000	36
262	208	Yu	2009	Further evidence for infection of pigs with human-like H1N1 influenza viruses in China	Virus Res	251	NA	NA	717	76	NA	10.6	serum	general	human-like swine	H1N1	H1	NA	0	other/NA	2006	2007	2	2005-2009	Pre-pdm09	China	Asia	9388211	482398000	6807.43	1357380000	36
263	210	Yuan	2013	Serological surveillance of H5 and H9 avian influenza A viral infections among pigs in Southern China	Microb Pathog	252	1	H5N1	3960	0	0	0	serum	general	avian	H5N1	avian	0	0	farm	2008	2012	5	2010-2016	Post-pdm09	China	Asia	9388211	482398000	6807.43	1357380000	36
264	210	Yuan	2013	Serological surveillance of H5 and H9 avian influenza A viral infections among pigs in Southern China	Microb Pathog	252	2	H9N2	3960	181	4.6	4.6	serum	general	avian	H9N2	avian	0	0	farm	2008	2012	5	2010-2016	Post-pdm09	China	Asia	9388211	482398000	6807.43	1357380000	36
265	211	Zhang	2011	Identification of an H6N6 swine influenza virus in southern China	Infect Genet Evol	254	2	serology H6N6	475	16	3.4	3.4	serum	diseased	avian	H6N6	avian	NA	1	farm	2010	2010	1	2010-2016	Post-pdm09	China	Asia	9388211	482398000	6807.43	1357380000	36
266	215	Zhou	1996	Influenza infection in humans and pigs in southeastern China	Arch Virol	261	1	human, swine viruses	200	3	NA	1.5	serum	general	human, swine	H1N1, H3N2	A,H1+H3	NA	NA	slaughterhouse	1993	1994	2	1995-1999	Pre-pdm09	China	Asia	9388211	482398000	6807.43	1357380000	36
267	215	Zhou	1996	Influenza infection in humans and pigs in southeastern China	Arch Virol	261	2	avian viruses	200	0	NA	0	serum	general	avian	H7	avian	NA	NA	slaughterhouse	1993	1994	2	1995-1999	Pre-pdm09	China	Asia	9388211	482398000	6807.43	1357380000	36
268	216	Zhou	2014	Avian-like A (H1N1) swine influenza virus antibodies among swine farm residents and pigs in southern China	Jpn J Infect Dis	260	NA	NA	1180	219	NA	18.6	serum	general	swine	H1N1	H1	NA	NA	farm	2011	2013	3	2010-2016	Post-pdm09	China	Asia	9388211	482398000	6807.43	1357380000	36
269	217	Zhou	2014	Serological report of influenza A (H7N9) infections among pigs in Southern China	BMC Vet Res	262	1	H9N2	1310	178	13.6	13.6	serum	general	avian	H9N2	avian	0	2	farm	2011	2012	2	2010-2016	Post-pdm09	China	Asia	9388211	482398000	6807.43	1357380000	36
270	217	Zhou	2014	Serological report of influenza A (H7N9) infections among pigs in Southern China	BMC Vet Res	262	2	H7N9	1310	26	2	2	serum	general	avian	H7N9	avian	0	2	farm	2011	2012	2	2010-2016	Post-pdm09	China	Asia	9388211	482398000	6807.43	1357380000	36
271	217	Zhou	2014	Serological report of influenza A (H7N9) infections among pigs in Southern China	BMC Vet Res	262	3	H1N1pdm09	1310	464	35.4	35.4	serum	general	human	H1N1	H1	0	2	farm	2011	2012	2	2010-2016	Post-pdm09	China	Asia	9388211	482398000	6807.43	1357380000	36
