# Supplementary material for: Epidemiological features of influenza circulation in swine populations: A systematic review and meta-analysis
Source: PLoS One. 2017 Jun 7;12(6):e0179044. doi: 10.1371/journal.pone.0179044 (PMC5462427; doi:10.1371/journal.pone.0179044)
Supplement: S3 Table — (XLSX) [file pone.0179044.s008.xlsx]

## Sheet: final.dsh16
id	s1reference	author	year	title	journal	refstudy	recordnb	recorddetail	samplesize	nbpositive	prevherd	prevherd2	sampletype	population	strain	diseasetest	diseasetest2	vaccination	ili	premise	yearstart	yearend	studylength	publishyear	period	country	continent	countryarea	countrypig	countrygdp	humanpop	pighum
1	6	Andreasen	2000	A longitudinal study of serological patterns of respiratory infections in nine infected Danish swine herds	Prev Vet Med	348	NA	NA	9	8	NA	88.9	serum	general	swine	H1, H3	A,H1+H3	NA	2	farm	1994	1994	1	2000-2004	Pre-pdm09	Denmark	Europe	42430	12075750	59818.6	5613706	215
2	8	Barigazzi	2003	Swine influenza in Italy	Vet Res Commun	68	3	serology H3N2	471	262	55.6	55.6	serum	diseased	swine	H3N2	H3	NA	1	other/NA	1998	2001	4	2000-2004	Pre-pdm09	Italy	Europe	294140	8661500	35685.6	59831093	14
3	8	Barigazzi	2003	Swine influenza in Italy	Vet Res Commun	68	4	serology H1N1	470	247	52.6	52.6	serum	diseased	swine	H1N1	H1	NA	1	other/NA	1998	2001	4	2000-2004	Pre-pdm09	Italy	Europe	294140	8661500	35685.6	59831093	14
4	8	Barigazzi	2003	Swine influenza in Italy	Vet Res Commun	68	5	serology H1N2	261	62	23.8	23.8	serum	diseased	swine	H1N2	H1	NA	1	other/NA	1998	2001	4	2000-2004	Pre-pdm09	Italy	Europe	294140	8661500	35685.6	59831093	14
5	22	Cao	2013	Avian influenza A (H5N1) virus antibodies in pigs and residents of swine farms, southern China	J Clin Virol	19	NA	NA	40	0	0	0	serum	general	avian	H5N1	avian	NA	NA	farm	2008	2013	6	2010-2016	Post-pdm09	China	Asia	9388211	482398000	6807.43	1357380000	36
6	23	Cardinale	2012	Influenza A(H1N1)pdm09 virus in pigs, Reunion Island	Emerg Infect Dis	21	1	2009-2010	57	47	82.4	82.5	serum	general	human	H1N1	H1	NA	NA	slaughterhouse	2009	2010	2	2010-2016	Post-pdm09	France-Reunion	Africa	2512	68500	23501	840974	8
7	23	Cardinale	2012	Influenza A(H1N1)pdm09 virus in pigs, Reunion Island	Emerg Infect Dis	25	4	June 2010, sero ELISA	45	6	13.33	13.3	serum	general	influenza A	influenza A	A,H1+H3	NA	0	slaughterhouse	2010	2010	1	2010-2016	Post-pdm09	France-Reunion	Africa	2512	68500	23501	840974	8
8	23	Cardinale	2012	Influenza A(H1N1)pdm09 virus in pigs, Reunion Island	Emerg Infect Dis	32	5	March 2011, sero ELISA	33	16	48.48	48.5	serum	general	influenza A	influenza A	A,H1+H3	NA	NA	slaughterhouse	2011	2011	1	2010-2016	Post-pdm09	France-Reunion	Africa	2512	68500	23501	840974	8
9	23	Cardinale	2012	Influenza A(H1N1)pdm09 virus in pigs, Reunion Island	Emerg Infect Dis	34	6	July-August 2011, sero ELISA	38	18	47.37	47.4	serum	general	influenza A	influenza A	A,H1+H3	NA	NA	slaughterhouse	2011	2011	1	2010-2016	Post-pdm09	France-Reunion	Africa	2512	68500	23501	840974	8
10	23	Cardinale	2012	Influenza A(H1N1)pdm09 virus in pigs, Reunion Island	Emerg Infect Dis	37	7	October 2011, sero ELISA	33	19	57.57	57.6	serum	general	influenza A	influenza A	A,H1+H3	NA	NA	slaughterhouse	2011	2011	1	2010-2016	Post-pdm09	France-Reunion	Africa	2512	68500	23501	840974	8
11	36	Ciacci-Zanella	2015	Influenza A virus infection in Brazilian swine herds following the introduction of pandemic 2009 H1N1	Vet Microbiol	305	1	serology	48	48	100	100	serum	diseased	swine, human	influenza A	A,H1+H3	0	1	farm	2011	2011	1	2010-2016	Post-pdm09	Brazil	Latin America	8358140	36743593	11208.1	200361925	18
12	43	Cuong	2014	Serological and virological surveillance for porcine reproductive and respiratory syndrome virus, porcine circovirus type 2, and influenza A viruses among smallholder swine farms of the Mekong Delta, Vietnam	Journal of Swine Health and Production	58	1	serology	68	16	23.5	23.5	serum	general	influenza A	influenza A	A,H1+H3	NA	NA	farm	2011	2011	1	2010-2016	Post-pdm09	Vietnam	Asia	310070	26261400	1910.51	89708900	29
13	45	Dias	2015	Distribution of antibodies against influenza virus in pigs from farrow-to-finish farms in Minas Gerais state, Brazil	Influenza Other Respir Viruses	307	1	H1N1pdm09	30	29	96.6	96.7	serum	general	swine	H1N1	H1	0	0	farm	2012	2012	1	2010-2016	Post-pdm09	Brazil	Latin America	8358140	36743593	11208.1	200361925	18
14	45	Dias	2015	Distribution of antibodies against influenza virus in pigs from farrow-to-finish farms in Minas Gerais state, Brazil	Influenza Other Respir Viruses	307	2	H3N2 sw	30	4	13.2	13.3	serum	general	swine	H3N2	H3	0	0	farm	2012	2012	1	2010-2016	Post-pdm09	Brazil	Latin America	8358140	36743593	11208.1	200361925	18
15	47	Dibarbora	2013	Swine influenza: clinical, serological, pathological, and virological cross-sectional studies in nine farms in Argentina	Influenza Other Respir Viruses	59	1	serology	9	9	NA	100	serum	diseased	influenza A	influenza A	A,H1+H3	0	1	farm	2012	2012	1	2010-2016	Post-pdm09	Argentina	Latin America	2736690	2440000	14715.2	41446246	6
16	48	El-Sayed	2010	Avian influenza prevalence in pigs, Egypt	Emerg Infect Dis	60	1	serology	11	4	NA	36.4	serum	general	avian	H5N1, H5N2	avian	NA	0	other/NA	2008	2008	1	2010-2016	Pre-pdm09	Egypt	Africa	995450	10600	3314.46	82056378	0
17	50	Fablet	2013	Different herd level factors associated with H1N1 or H1N2 influenza virus infections in fattening pigs	Prev Vet Med	61	3	same study than 2012 other article, herd-level influenza A (all subtypes)	125	103	82.4	82.4	serum	diseased	swine	H1N1, H1N2	H1	0	1	farm	2006	2008	3	2010-2016	Pre-pdm09	France	Europe	547561	13487588	42560.4	66028467	20
18	53	Foti	2008	Serological survey on Aujeszky's disease, swine influenza and porcine reproductive and respiratory syndrome virus infections in Italian pigs	Pol J Vet Sci	62	NA	NA	45	27	60	60	serum	general	influenza A	influenza A	A,H1+H3	0	NA	other/NA	2002	2004	3	2005-2009	Pre-pdm09	Italy	Europe	294140	8661500	35685.6	59831093	14
19	54	Fragaszy	2015	Increased risk of A(H1N1)pdm09 influenza infection in UK pig industry workers compared to a general population cohort	Influenza Other Respir Viruses	309	1	CS H1N1	14	0	0	0	serum	general	swine, human	H1	H1	0	NA	farm	2010	2010	1	2010-2016	Post-pdm09	UK	Europe	241930	4885000	41781.1	64097085	8
20	54	Fragaszy	2015	Increased risk of A(H1N1)pdm09 influenza infection in UK pig industry workers compared to a general population cohort	Influenza Other Respir Viruses	309	2	swine H3N2 87	14	1	NA	7.1	serum	general	swine, human	H3	H3	0	NA	farm	2010	2010	1	2010-2016	Post-pdm09	UK	Europe	241930	4885000	41781.1	64097085	8
21	54	Fragaszy	2015	Increased risk of A(H1N1)pdm09 influenza infection in UK pig industry workers compared to a general population cohort	Influenza Other Respir Viruses	309	3	swine avian-like H1N1	14	0	0	0	serum	general	swine, human	H1	H1	0	NA	farm	2010	2010	1	2010-2016	Post-pdm09	UK	Europe	241930	4885000	41781.1	64097085	8
22	54	Fragaszy	2015	Increased risk of A(H1N1)pdm09 influenza infection in UK pig industry workers compared to a general population cohort	Influenza Other Respir Viruses	309	4	H1N1pdm09	14	11	NA	78.6	serum	general	swine, human	H1	H1	0	NA	farm	2010	2010	1	2010-2016	Post-pdm09	UK	Europe	241930	4885000	41781.1	64097085	8
23	55	Gjerset	2011	Experiences after Twenty Months with Pandemic Influenza A (H1N1) 2009 Infection in the Naive Norwegian Pig Population	Influenza Res Treat	55	4	study 2 multiplier herds	NA	NA	34.4	34.4	serum	general	human	influenza A	A,H1+H3	NA	2	farm	2009	2010	2	2010-2016	Post-pdm09	Norway	Europe	365268	848063	100898	5084190	17
24	55	Gjerset	2011	Experiences after Twenty Months with Pandemic Influenza A (H1N1) 2009 Infection in the Naive Norwegian Pig Population	Influenza Res Treat	63	1	study 1 serology	140	55	NA	39.3	serum	general	human	influenza A	A,H1+H3	NA	2	other/NA	2009	2009	1	2010-2016	Post-pdm09	Norway	Europe	365268	848063	100898	5084190	17
25	55	Gjerset	2011	Experiences after Twenty Months with Pandemic Influenza A (H1N1) 2009 Infection in the Naive Norwegian Pig Population	Influenza Res Treat	64	3	study 2 nucleus herds	NA	NA	27.1	27.1	serum	general	human	influenza A	A,H1+H3	NA	2	farm	2009	2010	2	2010-2016	Post-pdm09	Norway	Europe	365268	848063	100898	5084190	17
26	55	Gjerset	2011	Experiences after Twenty Months with Pandemic Influenza A (H1N1) 2009 Infection in the Naive Norwegian Pig Population	Influenza Res Treat	65	5	study 3	38	3	NA	7.9	serum	general	human	influenza A	A,H1+H3	NA	2	other/NA	2010	2011	2	2010-2016	Post-pdm09	Norway	Europe	365268	848063	100898	5084190	17
27	55	Gjerset	2011	Experiences after Twenty Months with Pandemic Influenza A (H1N1) 2009 Infection in the Naive Norwegian Pig Population	Influenza Res Treat	66	6	study 4, 2009	452	16	3.5	3.5	serum	general	human	influenza A	A,H1+H3	NA	2	other/NA	2009	2009	1	2010-2016	Post-pdm09	Norway	Europe	365268	848063	100898	5084190	17
28	55	Gjerset	2011	Experiences after Twenty Months with Pandemic Influenza A (H1N1) 2009 Infection in the Naive Norwegian Pig Population	Influenza Res Treat	67	7	study 4, 2010	459	190	41	41.4	serum	general	human	influenza A	A,H1+H3	NA	2	other/NA	2010	2010	1	2010-2016	Post-pdm09	Norway	Europe	365268	848063	100898	5084190	17
29	59	Groschup	1993	Serological studies on the potential synergism of porcine reproductive and respiratory syndrome virus and influenza-, corona- and paramyxoviruses in the induction of respiratory symptoms in swine	Zentralbl Veterinarmed B	57	2	farm level H1N1	70	50	71.4	71.4	serum	diseased	swine	H1N1	H1	NA	1	other/NA	1991	1992	2	1990-1994	Pre-pdm09	Germany	Europe	348540	27690100	46251.4	80621788	34
30	59	Groschup	1993	Serological studies on the potential synergism of porcine reproductive and respiratory syndrome virus and influenza-, corona- and paramyxoviruses in the induction of respiratory symptoms in swine	Zentralbl Veterinarmed B	57	3	farm level H3N2	70	49	70	70	serum	diseased	human	H3N2	H3	NA	1	other/NA	1991	1992	2	1990-1994	Pre-pdm09	Germany	Europe	348540	27690100	46251.4	80621788	34
31	73	Jung	2002	Herd-level seroprevalence of swine-influenza virus in Korea	Prev Vet Med	70	NA	NA	130	93	71.5	71.5	serum	general	swine	H1N1	H1	0	0	farm	2000	2001	2	2000-2004	Pre-pdm09	South Korea	Asia	97350	9912204	25977	50219669	20
32	75	Jung	2007	Serologic surveillance of swine H1 and H3 and avian H5 and H9 influenza A virus infections in swine population in Korea	Prev Vet Med	69	1	H1, H3	53	53	100	100	serum	general	swine	H1, H3	A,H1+H3	NA	NA	farm	2005	2006	2	2005-2009	Pre-pdm09	South Korea	Asia	97350	9912204	25977	50219669	20
33	75	Jung	2007	Serologic surveillance of swine H1 and H3 and avian H5 and H9 influenza A virus infections in swine population in Korea	Prev Vet Med	69	2	H5, H9	53	0	0	0	serum	general	avian	H5, H9	avian	NA	NA	farm	2005	2006	2	2005-2009	Pre-pdm09	South Korea	Asia	97350	9912204	25977	50219669	20
34	90	Kyriakis	2013	Influenza A virus infection dynamics in swine farms in Belgium, France, Italy and Spain, 2006-2008	Vet Microbiol	363	1	Belgium S06	20	19	95	95	serum	general	swine	H1N1, H1N2, H3N2	A,H1+H3	0	NA	farm	2006	2006	1	2010-2016	Pre-pdm09	Belgium	Europe	30280	6592978	46929.6	11195138	59
35	90	Kyriakis	2013	Influenza A virus infection dynamics in swine farms in Belgium, France, Italy and Spain, 2006-2008	Vet Microbiol	364	2	Belgium 06-07	15	14	93.3	93.3	serum	general	swine	H1N1, H1N2, H3N2	A,H1+H3	0	NA	farm	2006	2007	2	2010-2016	Pre-pdm09	Belgium	Europe	30280	6592978	46929.6	11195138	59
36	90	Kyriakis	2013	Influenza A virus infection dynamics in swine farms in Belgium, France, Italy and Spain, 2006-2008	Vet Microbiol	365	3	Belgium S07	20	17	85	85	serum	general	swine	H1N1, H1N2, H3N2	A,H1+H3	0	NA	farm	2007	2007	1	2010-2016	Pre-pdm09	Belgium	Europe	30280	6592978	46929.6	11195138	59
37	90	Kyriakis	2013	Influenza A virus infection dynamics in swine farms in Belgium, France, Italy and Spain, 2006-2008	Vet Microbiol	366	4	Belgium 07-08	20	17	85	85	serum	general	swine	H1N1, H1N2, H3N2	A,H1+H3	0	NA	farm	2007	2008	2	2010-2016	Pre-pdm09	Belgium	Europe	30280	6592978	46929.6	11195138	59
38	90	Kyriakis	2013	Influenza A virus infection dynamics in swine farms in Belgium, France, Italy and Spain, 2006-2008	Vet Microbiol	367	5	Belgium S08	20	18	90	90	serum	general	swine	H1N1, H1N2, H3N2	A,H1+H3	0	NA	farm	2008	2008	1	2010-2016	Pre-pdm09	Belgium	Europe	30280	6592978	46929.6	11195138	59
39	90	Kyriakis	2013	Influenza A virus infection dynamics in swine farms in Belgium, France, Italy and Spain, 2006-2008	Vet Microbiol	368	6	Belgium 08-09	20	17	85	85	serum	general	swine	H1N1, H1N2, H3N2	A,H1+H3	0	NA	farm	2008	2009	2	2010-2016	Pre-pdm09	Belgium	Europe	30280	6592978	46929.6	11195138	59
40	90	Kyriakis	2013	Influenza A virus infection dynamics in swine farms in Belgium, France, Italy and Spain, 2006-2008	Vet Microbiol	369	7	Italy S06	17	16	94.1	94.1	serum	general	swine	H1N1, H1N2, H3N2	A,H1+H3	0	NA	farm	2006	2006	1	2010-2016	Pre-pdm09	Italy	Europe	294140	8661500	35685.6	59831093	14
41	90	Kyriakis	2013	Influenza A virus infection dynamics in swine farms in Belgium, France, Italy and Spain, 2006-2008	Vet Microbiol	370	8	Italy 06-07	13	11	85	85	serum	general	swine	H1N1, H1N2, H3N2	A,H1+H3	0	NA	farm	2006	2007	2	2010-2016	Pre-pdm09	Italy	Europe	294140	8661500	35685.6	59831093	14
42	90	Kyriakis	2013	Influenza A virus infection dynamics in swine farms in Belgium, France, Italy and Spain, 2006-2008	Vet Microbiol	371	9	Italy S07	17	15	88	88	serum	general	swine	H1N1, H1N2, H3N2	A,H1+H3	0	NA	farm	2007	2007	1	2010-2016	Pre-pdm09	Italy	Europe	294140	8661500	35685.6	59831093	14
43	90	Kyriakis	2013	Influenza A virus infection dynamics in swine farms in Belgium, France, Italy and Spain, 2006-2008	Vet Microbiol	372	10	Italy 07-08	15	12	80	80	serum	general	swine	H1N1, H1N2, H3N2	A,H1+H3	0	NA	farm	2007	2008	2	2010-2016	Pre-pdm09	Italy	Europe	294140	8661500	35685.6	59831093	14
44	90	Kyriakis	2013	Influenza A virus infection dynamics in swine farms in Belgium, France, Italy and Spain, 2006-2008	Vet Microbiol	373	11	Italy S08	15	10	67	67	serum	general	swine	H1N1, H1N2, H3N2	A,H1+H3	0	NA	farm	2008	2008	1	2010-2016	Pre-pdm09	Italy	Europe	294140	8661500	35685.6	59831093	14
45	90	Kyriakis	2013	Influenza A virus infection dynamics in swine farms in Belgium, France, Italy and Spain, 2006-2008	Vet Microbiol	374	12	Italy 08-09	15	14	93.3	93.3	serum	general	swine	H1N1, H1N2, H3N2	A,H1+H3	0	NA	farm	2008	2009	2	2010-2016	Pre-pdm09	Italy	Europe	294140	8661500	35685.6	59831093	14
46	90	Kyriakis	2013	Influenza A virus infection dynamics in swine farms in Belgium, France, Italy and Spain, 2006-2008	Vet Microbiol	375	13	France 06	22	18	82	82	serum	general	swine	H1N1, H1N2, H3N2	A,H1+H3	0	NA	farm	2006	2006	1	2010-2016	Pre-pdm09	France	Europe	547561	13487588	42560.4	66028467	20
47	90	Kyriakis	2013	Influenza A virus infection dynamics in swine farms in Belgium, France, Italy and Spain, 2006-2008	Vet Microbiol	376	14	France 06-07	22	22	100	100	serum	general	swine	H1N1, H1N2, H3N2	A,H1+H3	0	NA	farm	2006	2007	2	2010-2016	Pre-pdm09	France	Europe	547561	13487588	42560.4	66028467	20
48	90	Kyriakis	2013	Influenza A virus infection dynamics in swine farms in Belgium, France, Italy and Spain, 2006-2008	Vet Microbiol	377	15	France 07	22	19	86	86	serum	general	swine	H1N1, H1N2, H3N2	A,H1+H3	0	NA	farm	2007	2007	1	2010-2016	Pre-pdm09	France	Europe	547561	13487588	42560.4	66028467	20
49	90	Kyriakis	2013	Influenza A virus infection dynamics in swine farms in Belgium, France, Italy and Spain, 2006-2008	Vet Microbiol	378	16	France 07-08	22	21	95.4	95.4	serum	general	swine	H1N1, H1N2, H3N2	A,H1+H3	0	NA	farm	2007	2008	2	2010-2016	Pre-pdm09	France	Europe	547561	13487588	42560.4	66028467	20
50	90	Kyriakis	2013	Influenza A virus infection dynamics in swine farms in Belgium, France, Italy and Spain, 2006-2008	Vet Microbiol	379	17	France 08	22	21	95.4	95.4	serum	general	swine	H1N1, H1N2, H3N2	A,H1+H3	0	NA	farm	2008	2008	1	2010-2016	Pre-pdm09	France	Europe	547561	13487588	42560.4	66028467	20
51	90	Kyriakis	2013	Influenza A virus infection dynamics in swine farms in Belgium, France, Italy and Spain, 2006-2008	Vet Microbiol	380	18	France 08-09	22	18	82	82	serum	general	swine	H1N1, H1N2, H3N2	A,H1+H3	0	NA	farm	2008	2009	2	2010-2016	Pre-pdm09	France	Europe	547561	13487588	42560.4	66028467	20
52	90	Kyriakis	2013	Influenza A virus infection dynamics in swine farms in Belgium, France, Italy and Spain, 2006-2008	Vet Microbiol	381	19	Spain 06	21	21	100	100	serum	general	swine	H1N1, H1N2, H3N2	A,H1+H3	0	NA	farm	2006	2006	1	2010-2016	Pre-pdm09	Spain	Europe	498800	25494720	29882.1	46647421	55
53	90	Kyriakis	2013	Influenza A virus infection dynamics in swine farms in Belgium, France, Italy and Spain, 2006-2008	Vet Microbiol	382	20	Spain 06-07	21	19	90.5	90.5	serum	general	swine	H1N1, H1N2, H3N2	A,H1+H3	0	NA	farm	2006	2007	2	2010-2016	Pre-pdm09	Spain	Europe	498800	25494720	29882.1	46647421	55
54	90	Kyriakis	2013	Influenza A virus infection dynamics in swine farms in Belgium, France, Italy and Spain, 2006-2008	Vet Microbiol	383	21	Spain 07	21	19	90.5	90.5	serum	general	swine	H1N1, H1N2, H3N2	A,H1+H3	0	NA	farm	2007	2007	1	2010-2016	Pre-pdm09	Spain	Europe	498800	25494720	29882.1	46647421	55
55	90	Kyriakis	2013	Influenza A virus infection dynamics in swine farms in Belgium, France, Italy and Spain, 2006-2008	Vet Microbiol	384	22	Spain 07-08	21	20	95.2	95.2	serum	general	swine	H1N1, H1N2, H3N2	A,H1+H3	0	NA	farm	2007	2008	2	2010-2016	Pre-pdm09	Spain	Europe	498800	25494720	29882.1	46647421	55
56	90	Kyriakis	2013	Influenza A virus infection dynamics in swine farms in Belgium, France, Italy and Spain, 2006-2008	Vet Microbiol	385	23	Spain 08	21	21	100	100	serum	general	swine	H1N1, H1N2, H3N2	A,H1+H3	0	NA	farm	2008	2008	1	2010-2016	Pre-pdm09	Spain	Europe	498800	25494720	29882.1	46647421	55
57	90	Kyriakis	2013	Influenza A virus infection dynamics in swine farms in Belgium, France, Italy and Spain, 2006-2008	Vet Microbiol	386	24	Spain 08-09	19	19	100	100	serum	general	swine	H1N1, H1N2, H3N2	A,H1+H3	0	NA	farm	2008	2009	2	2010-2016	Pre-pdm09	Spain	Europe	498800	25494720	29882.1	46647421	55
58	91	Kyriakis	2015	Serological Evidence of Pandemic H1N1 Influenza Virus Infections in Greek Swine	Zoonoses Public Health	311	1	2002-2004	42	35	83.3	83.3	serum	general	swine, human	influenza A	A,H1+H3	0	0	farm	2002	2004	3	2010-2016	Pre-pdm09	Greece	Europe	128900	1077000	21965.9	11032328	10
59	91	Kyriakis	2015	Serological Evidence of Pandemic H1N1 Influenza Virus Infections in Greek Swine	Zoonoses Public Health	312	2	2010-2012	46	36	78.3	78.3	serum	general	swine, human	influenza A	A,H1+H3	0	0	farm	2010	2012	3	2010-2016	Post-pdm09	Greece	Europe	128900	1077000	21965.9	11032328	10
60	92	Lange	2013	Reassortants of the pandemic (H1N1) 2009 virus and establishment of a novel porcine H1N2 influenza virus, lineage in Germany	Vet Microbiol	71	1	serology avH1N1	2666	1497	56.3	56.2	serum	diseased	swine	H1N1	H1	NA	1	other/NA	2009	2012	4	2010-2016	Post-pdm09	Germany	Europe	348540	27690100	46251.4	80621788	34
61	92	Lange	2013	Reassortants of the pandemic (H1N1) 2009 virus and establishment of a novel porcine H1N2 influenza virus, lineage in Germany	Vet Microbiol	71	3	serology pdmH1N1	2666	1288	48.4	48.3	serum	diseased	human	H1N1	H1	NA	1	other/NA	2009	2012	4	2010-2016	Post-pdm09	Germany	Europe	348540	27690100	46251.4	80621788	34
62	92	Lange	2013	Reassortants of the pandemic (H1N1) 2009 virus and establishment of a novel porcine H1N2 influenza virus, lineage in Germany	Vet Microbiol	71	4	serology huH1N2	2666	1080	40.6	40.5	serum	diseased	swine	H1N2	H1	NA	1	other/NA	2009	2012	4	2010-2016	Post-pdm09	Germany	Europe	348540	27690100	46251.4	80621788	34
63	92	Lange	2013	Reassortants of the pandemic (H1N1) 2009 virus and establishment of a novel porcine H1N2 influenza virus, lineage in Germany	Vet Microbiol	71	5	serology huH3N2	2666	1341	50.4	50.3	serum	diseased	swine	H3N2	H3	NA	1	other/NA	2009	2012	4	2010-2016	Post-pdm09	Germany	Europe	348540	27690100	46251.4	80621788	34
64	92	Lange	2013	Reassortants of the pandemic (H1N1) 2009 virus and establishment of a novel porcine H1N2 influenza virus, lineage in Germany	Vet Microbiol	72	2	serology pdmH1huN2	1273	393	30.9	30.9	serum	diseased	swine	H1N2	H1	NA	1	other/NA	2012	2012	1	2010-2016	Post-pdm09	Germany	Europe	348540	27690100	46251.4	80621788	34
65	102	Lopez-Robles	2014	Serological and molecular prevalence of swine influenza virus on farms in northwestern Mexico	Vet Microbiol	1	1	serology	15	15	NA	100	serum	general	swine	H1N1, H3N2	A,H1+H3	0	NA	farm	2008	2009	2	2010-2016	Pre-pdm09	Mexico	Latin America	1943950	16201625	10307.3	122332399	13
66	103	Lopez-Soria	2010	Selected Swine viral pathogens in indoor pigs in Spain. Seroprevalence and farm-level characteristics	Transbound Emerg Dis	2	3	retrospective study boars	19	10	53	53	serum	diseased	influenza A	influenza A	A,H1+H3	NA	NA	farm	2003	2003	3	2010-2016	Pre-pdm09	Spain	Europe	498800	25494720	29882.1	46647421	55
67	103	Lopez-Soria	2010	Selected Swine viral pathogens in indoor pigs in Spain. Seroprevalence and farm-level characteristics	Transbound Emerg Dis	3	1	cross-sectional sow	44	42	96	95.5	serum	general	influenza A	influenza A	A,H1+H3	0	NA	farm	2002	2003	2	2010-2016	Pre-pdm09	Spain	Europe	498800	25494720	29882.1	46647421	55
68	103	Lopez-Soria	2010	Selected Swine viral pathogens in indoor pigs in Spain. Seroprevalence and farm-level characteristics	Transbound Emerg Dis	52	2	cross-sectional fattening	44	32	73	72.7	serum	general	influenza A	influenza A	A,H1+H3	0	NA	farm	2002	2003	2	2010-2016	Pre-pdm09	Spain	Europe	498800	25494720	29882.1	46647421	55
69	103	Lopez-Soria	2010	Selected Swine viral pathogens in indoor pigs in Spain. Seroprevalence and farm-level characteristics	Transbound Emerg Dis	53	4	retrospective study sows	191	166	87	87	serum	diseased	influenza A	influenza A	A,H1+H3	NA	NA	farm	2003	2003	3	2010-2016	Pre-pdm09	Spain	Europe	498800	25494720	29882.1	46647421	55
70	103	Lopez-Soria	2010	Selected Swine viral pathogens in indoor pigs in Spain. Seroprevalence and farm-level characteristics	Transbound Emerg Dis	54	5	retrospective study fattenings	152	103	68	68	serum	diseased	influenza A	influenza A	A,H1+H3	NA	NA	farm	2003	2003	3	2010-2016	Pre-pdm09	Spain	Europe	498800	25494720	29882.1	46647421	55
71	103	Lopez-Soria	2010	Selected Swine viral pathogens in indoor pigs in Spain. Seroprevalence and farm-level characteristics	Transbound Emerg Dis	73	6	retrospective study boars	12	8	67	67	serum	diseased	influenza A	influenza A	A,H1+H3	NA	NA	farm	2004	2004	3	2010-2016	Pre-pdm09	Spain	Europe	498800	25494720	29882.1	46647421	55
72	103	Lopez-Soria	2010	Selected Swine viral pathogens in indoor pigs in Spain. Seroprevalence and farm-level characteristics	Transbound Emerg Dis	74	7	retrospective study boars	19	10	53	53	serum	diseased	influenza A	influenza A	A,H1+H3	NA	NA	farm	2005	2005	3	2010-2016	Pre-pdm09	Spain	Europe	498800	25494720	29882.1	46647421	55
73	103	Lopez-Soria	2010	Selected Swine viral pathogens in indoor pigs in Spain. Seroprevalence and farm-level characteristics	Transbound Emerg Dis	75	8	retrospective study sows	244	232	95	95	serum	diseased	influenza A	influenza A	A,H1+H3	NA	NA	farm	2004	2004	3	2010-2016	Pre-pdm09	Spain	Europe	498800	25494720	29882.1	46647421	55
74	103	Lopez-Soria	2010	Selected Swine viral pathogens in indoor pigs in Spain. Seroprevalence and farm-level characteristics	Transbound Emerg Dis	76	9	retrospective study sows	221	203	92	92	serum	diseased	influenza A	influenza A	A,H1+H3	NA	NA	farm	2005	2005	3	2010-2016	Pre-pdm09	Spain	Europe	498800	25494720	29882.1	46647421	55
75	103	Lopez-Soria	2010	Selected Swine viral pathogens in indoor pigs in Spain. Seroprevalence and farm-level characteristics	Transbound Emerg Dis	77	10	retrospective study fattenings	223	174	78	78	serum	diseased	influenza A	influenza A	A,H1+H3	NA	NA	farm	2004	2004	3	2010-2016	Pre-pdm09	Spain	Europe	498800	25494720	29882.1	46647421	55
76	103	Lopez-Soria	2010	Selected Swine viral pathogens in indoor pigs in Spain. Seroprevalence and farm-level characteristics	Transbound Emerg Dis	78	11	retrospective study fattenings	217	178	82	82	serum	diseased	influenza A	influenza A	A,H1+H3	NA	NA	farm	2005	2005	3	2010-2016	Pre-pdm09	Spain	Europe	498800	25494720	29882.1	46647421	55
77	104	Lutteke	2014	Neutralizing antibodies against influenza A in pigs before and after the 2009 pandemic, Luxembourg	Vet Microbiol	4	1	2009	36	35	97	97.2	serum	general	swine, human	H1N1, H1N2, H3N2	A,H1+H3	NA	NA	farm	2009	2009	1	2010-2016	Post-pdm09	Luxembourg	Europe	2590	87518	110665	543202	16
78	104	Lutteke	2014	Neutralizing antibodies against influenza A in pigs before and after the 2009 pandemic, Luxembourg	Vet Microbiol	5	2	2012	40	26	65	65	serum	general	swine, human	H1N1, H1N2, H3N2	A,H1+H3	NA	NA	farm	2012	2012	1	2010-2016	Post-pdm09	Luxembourg	Europe	2590	87518	110665	543202	16
79	107	Maes	1999	Risk indicators for the seroprevalence of Mycoplasma hyopneumoniae, porcine influenza viruses and Aujeszky's disease virus in slaughter pigs from fattening pig herds	Zentralbl Veterinarmed B	6	1	H1N1,H3N2	41	41	100	100	serum	general	swine	H1N1,H3N2	H1	1	NA	farm	1999	1999	1	1995-1999	Pre-pdm09	Belgium	Europe	30280	6592978	46929.6	11195138	59
80	108	Maes	2000	Herd factors associated with the seroprevalences of four major respiratory pathogens in slaughter pigs from farrow-to-finish pig herds	Vet Res	7	1	H1N1	115	110	96	95.7	serum	general	swine	H1N1	H1	1	NA	farm	1995	1995	1	2000-2004	Pre-pdm09	Belgium	Europe	30280	6592978	46929.6	11195138	59
81	108	Maes	2000	Herd factors associated with the seroprevalences of four major respiratory pathogens in slaughter pigs from farrow-to-finish pig herds	Vet Res	7	2	H3N2	115	92	80	80	serum	general	swine	H3N2	H3	1	NA	farm	1995	1995	1	2000-2004	Pre-pdm09	Belgium	Europe	30280	6592978	46929.6	11195138	59
82	109	Maldonado	2006	Evidence of the concurrent circulation of H1N2, H1N1 and H3N2 influenza A viruses in densely populated pig areas in Spain	Vet J	8	1	serology	100	83	83	83	serum	general	swine	H1N1, H1N2, H3N2	A,H1+H3	0	NA	farm	2003	2003	1	2005-2009	Pre-pdm09	Spain	Europe	498800	25494720	29882.1	46647421	55
83	110	Markowska-Daniel	2005	Seroprevalence of antibodies against swine influenza virus in pigs of different age	Bulletin of the Veterinary Institute in Pulawy	10	4	Lithuania H1N1	11	3	27.3	27.3	serum	general	swine	H1N1	H1	0	NA	farm	2005	2005	1	2005-2009	Pre-pdm09	Lithuania	Europe	62674	807500	15529.7	2956121	27
84	110	Markowska-Daniel	2005	Seroprevalence of antibodies against swine influenza virus in pigs of different age	Bulletin of the Veterinary Institute in Pulawy	10	5	Lithuania H1N2	11	1	9.1	9.1	serum	general	swine	H1N2	H1	0	NA	farm	2005	2005	1	2005-2009	Pre-pdm09	Lithuania	Europe	62674	807500	15529.7	2956121	27
85	110	Markowska-Daniel	2005	Seroprevalence of antibodies against swine influenza virus in pigs of different age	Bulletin of the Veterinary Institute in Pulawy	10	6	Lithuania H3N2	11	0	0	0	serum	general	swine	H3N2	H3	0	NA	farm	2005	2005	1	2005-2009	Pre-pdm09	Lithuania	Europe	62674	807500	15529.7	2956121	27
86	110	Markowska-Daniel	2005	Seroprevalence of antibodies against swine influenza virus in pigs of different age	Bulletin of the Veterinary Institute in Pulawy	9	1	Poland H1N1	36	4	11.1	11.1	serum	general	swine	H1N1	H1	0	NA	farm	2005	2005	1	2005-2009	Pre-pdm09	Poland	Europe	306220	11162472	13653.7	38530725	29
87	110	Markowska-Daniel	2005	Seroprevalence of antibodies against swine influenza virus in pigs of different age	Bulletin of the Veterinary Institute in Pulawy	9	2	Poland H1N2	36	2	5.5	5.6	serum	general	swine	H1N2	H1	0	NA	farm	2005	2005	1	2005-2009	Pre-pdm09	Poland	Europe	306220	11162472	13653.7	38530725	29
88	110	Markowska-Daniel	2005	Seroprevalence of antibodies against swine influenza virus in pigs of different age	Bulletin of the Veterinary Institute in Pulawy	9	3	Poland H3N2	36	1	2.8	2.8	serum	general	swine	H3N2	H3	0	NA	farm	2005	2005	1	2005-2009	Pre-pdm09	Poland	Europe	306220	11162472	13653.7	38530725	29
89	112	Mastin	2011	Prevalence and risk factors for swine influenza virus infection in the English pig population	PLoS Curr	11	NA	NA	143	75	52	52.4	serum	general	swine	H1N1, H1N2, H3N2	A,H1+H3	NA	NA	farm	2008	2009	2	2010-2016	Pre-pdm09	UK	Europe	241930	4885000	41781.1	64097085	8
90	113	Meemken	2014	Establishment of serological herd profiles for zoonoses and production diseases in pigs by "meat juice multi-serology"	Prev Vet Med	12	1	H1N1	49	29	60	59.2	meat juice	general	swine	H1N1	H1	NA	NA	slaughterhouse	2010	2011	2	2010-2016	Post-pdm09	Germany	Europe	348540	27690100	46251.4	80621788	34
91	113	Meemken	2014	Establishment of serological herd profiles for zoonoses and production diseases in pigs by "meat juice multi-serology"	Prev Vet Med	12	2	H3N2	49	7	14	14.3	meat juice	general	swine	H3N2	H3	NA	NA	slaughterhouse	2010	2011	2	2010-2016	Post-pdm09	Germany	Europe	348540	27690100	46251.4	80621788	34
92	117	Meyns	2011	A cross-sectional study of risk factors associated with pulmonary lesions in pigs at slaughter	Vet J	20	NA	NA	50	50	100	100	serum	general	swine	H1N1, H1N2, H3N2	A,H1+H3	1	2	slaughterhouse	2007	2007	1	2010-2016	Pre-pdm09	Belgium	Europe	30280	6592978	46929.6	11195138	59
93	128	Njabo	2012	Pandemic A/H1N1/2009 influenza virus in swine, Cameroon, 2010	Vet Microbiol	13	2	serology	11	1	NA	9.1	serum	general	influenza A	influenza A	A,H1+H3	NA	2	other/NA	2009	2010	2	2010-2016	Post-pdm09	Cameroon	Africa	472710	1750000	1328.64	22253959	8
94	129	Nokireki	2013	The first detection of influenza in the Finnish pig population: a retrospective study	Acta Vet Scand	14	1	disease surveillance H1N1	401	120	29.9	29.9	serum	general	swine	H1N1, H1N2, H3N2	H1	NA	NA	slaughterhouse	2007	2009	3	2010-2016	Pre-pdm09	Finland	Europe	303890	1300385	49150.6	5439407	24
95	129	Nokireki	2013	The first detection of influenza in the Finnish pig population: a retrospective study	Acta Vet Scand	15	4	special health class farms H1N1, H1N2, H3N2	42	1	2.3	2.4	serum	general	swine	H1N1, H1N2, H3N2	H1	NA	NA	farm	2008	2008	1	2010-2016	Pre-pdm09	Finland	Europe	303890	1300385	49150.6	5439407	24
96	129	Nokireki	2013	The first detection of influenza in the Finnish pig population: a retrospective study	Acta Vet Scand	16	5	special health class farms H1N1, H1N2, H3N2	31	4	12.9	12.9	serum	general	swine	H1N1, H1N2, H3N2	H1	NA	NA	farm	2009	2009	1	2010-2016	Post-pdm09	Finland	Europe	303890	1300385	49150.6	5439407	24
97	129	Nokireki	2013	The first detection of influenza in the Finnish pig population: a retrospective study	Acta Vet Scand	17	7	diagnostic samples 2008 H1N1 H1N1, H1N2, H3N2	18	7	38.8	38.9	serum	diseased	swine	H1N1, H1N2, H3N2	H1	NA	1	farm	2008	2008	1	2010-2016	Pre-pdm09	Finland	Europe	303890	1300385	49150.6	5439407	24
98	129	Nokireki	2013	The first detection of influenza in the Finnish pig population: a retrospective study	Acta Vet Scand	18	8	diagnostic samples 2009 H1N1 H1N1, H1N2, H3N2	24	13	54.2	54.2	serum	diseased	swine	H1N1, H1N2, H3N2	H1	NA	1	farm	2009	2009	1	2010-2016	Post-pdm09	Finland	Europe	303890	1300385	49150.6	5439407	24
99	131	Nowotny	1994	Serological studies in Austrian fattening pigs with respiratory disorders	Acta Vet Hung	56	NA	NA	44	18	40.9	40.9	serum	diseased	swine	H1N1	H1	NA	1	other/NA	1992	1993	2	1990-1994	Pre-pdm09	Austria	Europe	82409	2983158	50510.7	8473786	35
100	147	Pineyro	2010	Seroprevalence of the swine influenza virus in fattening pigs in Argentina in the 2002 season: evaluation by hemagglutination-inhibition and ELISA tests	Rev Argent Microbiol	22	NA	NA	13	11	84.61	84.6	serum	general	human	H1N1, H3N2	A,H1+H3	0	0	farm	2002	2002	1	2010-2016	Pre-pdm09	Argentina	Latin America	2736690	2440000	14715.2	41446246	6
101	148	Poljak	2008	Investigation of exposure to swine influenza viruses in Ontario (Canada) finisher herds in 2004 and 2005	Prev Vet Med	27	1	2004 H1N1	46	17	37	37	serum	general	swine	H1N1	H1	NA	NA	farm	2004	2004	1	2005-2009	Pre-pdm09	Canada	North America	9093510	12879000	51964.3	35158304	37
102	148	Poljak	2008	Investigation of exposure to swine influenza viruses in Ontario (Canada) finisher herds in 2004 and 2005	Prev Vet Med	27	2	2004 H3N2	46	5	10.9	10.9	serum	general	swine	H3N2	H3	NA	NA	farm	2004	2004	1	2005-2009	Pre-pdm09	Canada	North America	9093510	12879000	51964.3	35158304	37
103	148	Poljak	2008	Investigation of exposure to swine influenza viruses in Ontario (Canada) finisher herds in 2004 and 2005	Prev Vet Med	28	3	2005 H1N1	49	24	49	49	serum	general	swine	H1N1	H1	NA	NA	farm	2005	2006	2	2005-2009	Pre-pdm09	Canada	North America	9093510	12879000	51964.3	35158304	37
104	148	Poljak	2008	Investigation of exposure to swine influenza viruses in Ontario (Canada) finisher herds in 2004 and 2005	Prev Vet Med	28	4	2005 H3N2	49	26	53.1	53.1	serum	general	swine	H3N2	H3	NA	NA	farm	2005	2006	2	2005-2009	Pre-pdm09	Canada	North America	9093510	12879000	51964.3	35158304	37
105	149	Poljak	2008	Prevalence of and risk factors for influenza in southern Ontario swine herds in 2001 and 2003	Can J Vet Res	23	1	2001 sows herd level	65	57	87.7	87.7	serum	general	swine	H1N1	H1	0	NA	farm	2001	2001	1	2005-2009	Pre-pdm09	Canada	North America	9093510	12879000	51964.3	35158304	37
106	149	Poljak	2008	Prevalence of and risk factors for influenza in southern Ontario swine herds in 2001 and 2003	Can J Vet Res	24	2	2001 finishers herd level	72	34	47.2	47.2	serum	general	swine	H1N1	H1	0	NA	farm	2001	2001	1	2005-2009	Pre-pdm09	Canada	North America	9093510	12879000	51964.3	35158304	37
107	149	Poljak	2008	Prevalence of and risk factors for influenza in southern Ontario swine herds in 2001 and 2003	Can J Vet Res	26	3	2003 sows H3N2 CO	76	7	9.2	9.2	serum	general	swine	H3N2	H3	0	NA	farm	2003	2003	1	2005-2009	Pre-pdm09	Canada	North America	9093510	12879000	51964.3	35158304	37
108	149	Poljak	2008	Prevalence of and risk factors for influenza in southern Ontario swine herds in 2001 and 2003	Can J Vet Res	26	4	2003 sows H3N2 TX	76	6	7.9	7.9	serum	general	swine	H3N2	H3	0	NA	farm	2003	2003	1	2005-2009	Pre-pdm09	Canada	North America	9093510	12879000	51964.3	35158304	37
109	152	Pozzi	2010	Investigation of swine influenza sub-types H1N1, H32, N1N2 in pigs population in Israel (2002-2009)	Israel Journal of Veterinary Medicine	29	1	serology	16	0	NA	0	serum	general	swine	H1N1, H1N2, H3N2	A,H1+H3	NA	NA	farm	2002	2009	8	2010-2016	Pre-pdm09	Israel	Africa	21640	176900	36050.7	8059400	2
110	156	Rajao	2013	Serological evidence of swine influenza in Brazil	Influenza Other Respir Viruses	30	1	H1N1 swine	17	11	64.7	64.7	serum	general	swine	H1N1	H1	0	0	farm	2009	2009	1	2010-2016	Post-pdm09	Brazil	Latin America	8358140	36743593	11208.1	200361925	18
111	156	Rajao	2013	Serological evidence of swine influenza in Brazil	Influenza Other Respir Viruses	30	2	H1N1 human	17	10	58.8	58.8	serum	general	human	H1N1	H1	0	0	farm	2009	2009	1	2010-2016	Post-pdm09	Brazil	Latin America	8358140	36743593	11208.1	200361925	18
112	156	Rajao	2013	Serological evidence of swine influenza in Brazil	Influenza Other Respir Viruses	30	3	H3N2	17	4	23.5	23.5	serum	general	human	H3N2	H3	0	0	farm	2009	2009	1	2010-2016	Post-pdm09	Brazil	Latin America	8358140	36743593	11208.1	200361925	18
113	158	Regula	2000	Comparison of serologic testing and slaughter evaluation for assessing the effects of subclinical infection on growth in pigs	J Am Vet Med Assoc	387	1	8 week old	7	7	NA	100	serum	general	swine	H1N1	H1	0	0	farm	1996	1997	2	2000-2004	Pre-pdm09	USA	North America	9147420	64775000	53042	316128839	20
114	169	Shieh	2008	Surveillance of avian and swine influenza in the swine population in Taiwan, 2004	J Microbiol Immunol Infect	31	1	serology	1974	1235	62.6	62.6	serum	general	swine	influenza A	A,H1+H3	NA	NA	farm	2004	2004	1	2005-2009	Pre-pdm09	Taiwan	Asia	36193	6300000	39600	23340000	27
115	172	Simon-Grife	2011	Seroprevalence and risk factors of swine influenza in Spain	Vet Microbiol	33	NA	NA	98	98	100	100	serum	general	swine	H1N1, H1N2, H3N2	A,H1+H3	1	2	farm	2008	2009	2	2010-2016	Pre-pdm09	Spain	Europe	498800	25494720	29882.1	46647421	55
116	173	Snoeck	2015	Serological evidence of pandemic (H1N1) 2009 virus in pigs, West and Central Africa	Vet Microbiol	327	2	Nigeria 2009 dsh1	31	2	6.5	6.5	serum	general	swine, human	H1N1	H1	0	2	other/NA	2009	2009	1	2010-2016	Post-pdm09	Nigeria	Africa	910770	8080000	3005.51	173615345	5
117	173	Snoeck	2015	Serological evidence of pandemic (H1N1) 2009 virus in pigs, West and Central Africa	Vet Microbiol	327	3	Nigeria 2009 dsh2	31	8	25.8	25.8	serum	general	swine, human	H1N1, H1N2	H1	0	2	other/NA	2009	2009	1	2010-2016	Post-pdm09	Nigeria	Africa	910770	8080000	3005.51	173615345	5
118	173	Snoeck	2015	Serological evidence of pandemic (H1N1) 2009 virus in pigs, West and Central Africa	Vet Microbiol	327	4	Nigeria 2009 dsh3	31	4	12.9	12.9	serum	general	swine, human	H3N2	H3	0	2	other/NA	2009	2009	1	2010-2016	Post-pdm09	Nigeria	Africa	910770	8080000	3005.51	173615345	5
119	173	Snoeck	2015	Serological evidence of pandemic (H1N1) 2009 virus in pigs, West and Central Africa	Vet Microbiol	327	5	Nigeria 2009 dsh4	31	1	3.2	3.2	serum	general	swine, human	H1N1	H1	0	2	other/NA	2009	2009	1	2010-2016	Post-pdm09	Nigeria	Africa	910770	8080000	3005.51	173615345	5
120	173	Snoeck	2015	Serological evidence of pandemic (H1N1) 2009 virus in pigs, West and Central Africa	Vet Microbiol	327	6	Nigeria 2009 dsh5	31	2	6.5	6.5	serum	general	swine, human	H3N2	H3	0	2	other/NA	2009	2009	1	2010-2016	Post-pdm09	Nigeria	Africa	910770	8080000	3005.51	173615345	5
121	173	Snoeck	2015	Serological evidence of pandemic (H1N1) 2009 virus in pigs, West and Central Africa	Vet Microbiol	327	7	Nigeria 2009 dsh6	31	1	3.2	3.2	serum	general	swine, human	H1N1	H1	0	2	other/NA	2009	2009	1	2010-2016	Post-pdm09	Nigeria	Africa	910770	8080000	3005.51	173615345	5
122	173	Snoeck	2015	Serological evidence of pandemic (H1N1) 2009 virus in pigs, West and Central Africa	Vet Microbiol	328	9	Nigeria 2012 dsh1	75	66	88	88	serum	general	swine, human	H1N1	H1	0	2	other/NA	2012	2012	1	2010-2016	Post-pdm09	Nigeria	Africa	910770	8080000	3005.51	173615345	5
123	173	Snoeck	2015	Serological evidence of pandemic (H1N1) 2009 virus in pigs, West and Central Africa	Vet Microbiol	328	10	Nigeria 2012 dsh2	75	41	54.7	54.7	serum	general	swine, human	H1N1	H1	0	2	other/NA	2012	2012	1	2010-2016	Post-pdm09	Nigeria	Africa	910770	8080000	3005.51	173615345	5
124	173	Snoeck	2015	Serological evidence of pandemic (H1N1) 2009 virus in pigs, West and Central Africa	Vet Microbiol	328	11	Nigeria 2012 dsh3	75	53	70.7	70.7	serum	general	swine, human	H1N1	H1	0	2	other/NA	2012	2012	1	2010-2016	Post-pdm09	Nigeria	Africa	910770	8080000	3005.51	173615345	5
125	173	Snoeck	2015	Serological evidence of pandemic (H1N1) 2009 virus in pigs, West and Central Africa	Vet Microbiol	329	15	Cameroom dsh1	29	7	24.1	24.1	serum	general	swine, human	H1N1	H1	0	0	farm	2011	2011	1	2010-2016	Post-pdm09	Cameroon	Africa	472710	1750000	1328.64	22253959	8
126	173	Snoeck	2015	Serological evidence of pandemic (H1N1) 2009 virus in pigs, West and Central Africa	Vet Microbiol	329	16	Cameroom dsh2	29	7	24.1	24.1	serum	general	swine, human	H1N1	H1	0	0	farm	2011	2011	1	2010-2016	Post-pdm09	Cameroon	Africa	472710	1750000	1328.64	22253959	8
127	173	Snoeck	2015	Serological evidence of pandemic (H1N1) 2009 virus in pigs, West and Central Africa	Vet Microbiol	329	17	Cameroom dsh3	29	6	20.7	20.7	serum	general	swine, human	H1N1	H1	0	0	farm	2011	2011	1	2010-2016	Post-pdm09	Cameroon	Africa	472710	1750000	1328.64	22253959	8
128	182	Suriya	2008	Seroprevalence and risk factors for influenza A viruses in pigs in Peninsular Malaysia	Zoonoses Public Health	35	1	serology H1N1, H3N2	41	25	NA	61	serum	general	swine	H1N1, H3N2	A,H1+H3	0	0	farm	2005	2005	1	2005-2009	Pre-pdm09	Malaysia	Asia	328550	1816660	10538.1	29716965	6
129	184	Trevennec	2011	Swine influenza in Vietnam: preliminary results of epidemiological studies	Influenza Other Respir Viruses	36	1	serology	76	13	17.1	17.1	serum	general	influenza A	influenza A	A,H1+H3	0	NA	farm	2009	2009	1	2010-2016	Post-pdm09	Vietnam	Asia	310070	26261400	1910.51	89708900	29
130	186	Trevennec	2012	Transmission of pandemic influenza H1N1 (2009) in Vietnamese swine in 2009-2010	Influenza Other Respir Viruses	51	3	serology farm	198	58	29.5	29.3	serum	general	human	H1N1	H1	0	NA	farm	2009	2010	2	2010-2016	Post-pdm09	Vietnam	Asia	310070	26261400	1910.51	89708900	29
131	189	Van Reeth	2000	Isolations of H1N2 influenza A virus from pigs in Belgium	Influenza Other Respir Viruses	45	3	H1N1, H1N2, H3N2	74	74	100	100	serum	general	swine	H1N1, H1N2, H3N2	H1	NA	NA	farm	1999	1999	1	2000-2004	Pre-pdm09	Belgium	Europe	30280	6592978	46929.6	11195138	59
132	190	Van Reeth	2008	Seroprevalence of H1N1, H3N2 and H1N2 influenza viruses in pigs in seven European countries in 2002-2003	Influenza Other Respir Viruses	38	1	Belgium	100	99	99	99	serum	general	swine	H1N1, H1N2, H3N2	A,H1+H3	0	NA	farm	2002	2003	2	2005-2009	Pre-pdm09	Belgium	Europe	30280	6592978	46929.6	11195138	59
133	190	Van Reeth	2008	Seroprevalence of H1N1, H3N2 and H1N2 influenza viruses in pigs in seven European countries in 2002-2003	Influenza Other Respir Viruses	39	2	Germany	93	91	97.8	97.8	serum	general	swine	H1N1, H1N2, H3N2	A,H1+H3	0	NA	farm	2002	2003	2	2005-2009	Pre-pdm09	Germany	Europe	348540	27690100	46251.4	80621788	34
134	190	Van Reeth	2008	Seroprevalence of H1N1, H3N2 and H1N2 influenza viruses in pigs in seven European countries in 2002-2003	Influenza Other Respir Viruses	40	3	Italy	76	67	88.2	88.2	serum	general	swine	H1N1, H1N2, H3N2	A,H1+H3	0	NA	farm	2002	2003	2	2005-2009	Pre-pdm09	Italy	Europe	294140	8661500	35685.6	59831093	14
135	190	Van Reeth	2008	Seroprevalence of H1N1, H3N2 and H1N2 influenza viruses in pigs in seven European countries in 2002-2003	Influenza Other Respir Viruses	41	4	Spain	100	96	96	96	serum	general	swine	H1N1, H1N2, H3N2	A,H1+H3	0	NA	farm	2002	2003	2	2005-2009	Pre-pdm09	Spain	Europe	498800	25494720	29882.1	46647421	55
136	190	Van Reeth	2008	Seroprevalence of H1N1, H3N2 and H1N2 influenza viruses in pigs in seven European countries in 2002-2003	Influenza Other Respir Viruses	42	5	Czech Republic	84	37	44	44	serum	general	swine	H1N1, H1N2, H3N2	A,H1+H3	0	NA	farm	2002	2003	2	2005-2009	Pre-pdm09	Czech Republic	Europe	77230	1586627	19858.3	10521468	15
137	190	Van Reeth	2008	Seroprevalence of H1N1, H3N2 and H1N2 influenza viruses in pigs in seven European countries in 2002-2003	Influenza Other Respir Viruses	43	6	Ireland	98	54	55.1	55.1	serum	general	swine	H1N1, H1N2, H3N2	A,H1+H3	0	NA	farm	2002	2003	2	2005-2009	Pre-pdm09	Ireland	Europe	68890	1552000	50478.4	4595281	34
138	190	Van Reeth	2008	Seroprevalence of H1N1, H3N2 and H1N2 influenza viruses in pigs in seven European countries in 2002-2003	Influenza Other Respir Viruses	44	7	Poland	100	9	9	9	serum	general	swine	H1N1, H1N2, H3N2	A,H1+H3	0	NA	farm	2002	2003	2	2005-2009	Pre-pdm09	Poland	Europe	306220	11162472	13653.7	38530725	29
139	195	Webby	2000	Evolution of swine H3N2 influenza viruses in the United States	J Virol	46	2	H3N2 herd level	188	106	NA	56.4	serum	general	swine	H3N2	H3	0	NA	other/NA	1998	1999	2	2000-2004	Pre-pdm09	USA	North America	9147420	64775000	53042	316128839	20
140	197	Wellenberg	2010	A study on the severity and relevance of porcine circovirus type 2 infections in Dutch fattening pigs with respiratory diseases	Vet Microbiol	47	3	H1N1, H1N2, H3N2	29	29	100	100	serum	general	swine	H1N1, H1N2, H3N2	H3	0	NA	farm	2007	2007	1	2010-2016	Pre-pdm09	Netherlands	Europe	33720	12212300	50792.5	16804224	73
141	204	Yaeger	2009	Survey of disease pressures in twenty-six niche herds in the midwestern United States	Journal of Swine Health and Production	48	1	serology	21	21	NA	100	serum	general	swine	H1N1, H3N2	A,H1+H3	1	NA	farm	2006	2007	2	2005-2009	Pre-pdm09	USA	North America	9147420	64775000	53042	316128839	20
142	210	Yuan	2013	Serological surveillance of H5 and H9 avian influenza A viral infections among pigs in Southern China	Microb Pathog	49	1	H5N1	100	0	0	0	serum	general	avian	H5N1	avian	0	0	farm	2008	2012	5	2010-2016	Post-pdm09	China	Asia	9388211	482398000	6807.43	1357380000	36
143	211	Zhang	2011	Identification of an H6N6 swine influenza virus in southern China	Infect Genet Evol	50	2	serology H6N6	11	4	NA	36.4	serum	diseased	avian	H6N6	avian	NA	1	farm	2010	2010	1	2010-2016	Post-pdm09	China	Asia	9388211	482398000	6807.43	1357380000	36
