# Supplementary material for: Epidemiological features of influenza circulation in swine populations: A systematic review and meta-analysis
Source: PLoS One. 2017 Jun 7;12(6):e0179044. doi: 10.1371/journal.pone.0179044 (PMC5462427; doi:10.1371/journal.pone.0179044)
Supplement: S4 Table — (XLSX) [file pone.0179044.s009.xlsx]

## Sheet: final.dv16
id	s1reference	author	year	title	journal	refstudy	recordnb	recorddetail	irsamplesize	irnbpositive	isolationrate	isolationrate2	drsamplesize	drnbpositive	detectionrate	detectionrate2	sampletype	test1	test2	test3	diseasetest	detailpdm	studytype	ili	ili2	premise	yearstart	yearend	studylength	publishyear	period	country	continent	countryarea	countrypig	countrygdp	humanpop	pighum
1	1	Abe	2015	Co-infection of influenza A viruses of swine contributes to effective shuffling of gene segments in a naturally reared pig	Virology	300	NA	NA	738	12	NA	1.6	NA	NA	NA	NA	nasal swabs	Isolation MDCK	RT-PCR	NA	H1, H3	H1N1pdm-reass	longitudinal	0	0	farm	2011	2014	4	2010-2016	Post-pdm09	Thailand	Asia	510890	7923654	5778.98	67010502	12
2	2	Adeola	2009	Isolation of influenza A viruses from pigs in Ibadan, Nigeria	Vet Ital	1	NA	NA	50	7	14	14	NA	NA	NA	NA	nasal swab	Isolation Hep-2	Isolation Eggs	HI	H1N1, H3N2	Other/NA	cross-sectional	0	0	other/NA	2008	2008	1	2005-2009	Pre-pdm09	Nigeria	Africa	910770	8080000	3005.51	173615345	5
3	4	Allerson	2013	Infection Dynamics of Pandemic 2009 H1N1 Influenza Virus in a Two-Site Swine Herd	Transbound Emerg Dis	340	1	Site 1 Sampling 1	NA	NA	NA	NA	239	7	NA	2.9	nasal swabs	RT-PCR	Isolation MDCK	NA	influenza A	H1N1pdm-reass	longitudinal	2	2	farm	2010	2010	1	2010-2016	Post-pdm09	USA	North America	9147420	64775000	53042	316128839	20
4	4	Allerson	2013	Infection Dynamics of Pandemic 2009 H1N1 Influenza Virus in a Two-Site Swine Herd	Transbound Emerg Dis	341	2	Site 1 Sampling 2	NA	NA	NA	NA	238	4	NA	1.7	nasal swabs	RT-PCR	Isolation MDCK	NA	influenza A	H1N1pdm-reass	longitudinal	2	2	farm	2010	2010	1	2010-2016	Post-pdm09	USA	North America	9147420	64775000	53042	316128839	20
5	4	Allerson	2013	Infection Dynamics of Pandemic 2009 H1N1 Influenza Virus in a Two-Site Swine Herd	Transbound Emerg Dis	342	3	Site 1 Sampling 3	NA	NA	NA	NA	58	0	NA	0	nasal swabs	RT-PCR	Isolation MDCK	NA	influenza A	H1N1pdm-reass	longitudinal	2	2	farm	2010	2010	1	2010-2016	Post-pdm09	USA	North America	9147420	64775000	53042	316128839	20
6	4	Allerson	2013	Infection Dynamics of Pandemic 2009 H1N1 Influenza Virus in a Two-Site Swine Herd	Transbound Emerg Dis	343	4	Site 2 Sampling 1	NA	NA	NA	NA	60	8	0.13	13.3	nasal swabs	RT-PCR	Isolation MDCK	NA	influenza A	H1N1pdm-reass	longitudinal	2	2	farm	2010	2010	1	2010-2016	Post-pdm09	USA	North America	9147420	64775000	53042	316128839	20
7	4	Allerson	2013	Infection Dynamics of Pandemic 2009 H1N1 Influenza Virus in a Two-Site Swine Herd	Transbound Emerg Dis	344	5	Site 2 Sampling 2	NA	NA	NA	NA	60	28	0.47	46.7	nasal swabs	RT-PCR	Isolation MDCK	NA	influenza A	H1N1pdm-reass	longitudinal	2	2	farm	2010	2010	1	2010-2016	Post-pdm09	USA	North America	9147420	64775000	53042	316128839	20
8	4	Allerson	2013	Infection Dynamics of Pandemic 2009 H1N1 Influenza Virus in a Two-Site Swine Herd	Transbound Emerg Dis	345	5	Site 2 Sampling 3	NA	NA	NA	NA	60	6	0.1	10	nasal swabs	RT-PCR	Isolation MDCK	NA	influenza A	H1N1pdm-reass	longitudinal	2	2	farm	2010	2010	1	2010-2016	Post-pdm09	USA	North America	9147420	64775000	53042	316128839	20
9	4	Allerson	2013	Infection Dynamics of Pandemic 2009 H1N1 Influenza Virus in a Two-Site Swine Herd	Transbound Emerg Dis	346	5	Site 2 Sampling 4	NA	NA	NA	NA	60	0	0	0	nasal swabs	RT-PCR	Isolation MDCK	NA	influenza A	H1N1pdm-reass	longitudinal	2	2	farm	2010	2010	1	2010-2016	Post-pdm09	USA	North America	9147420	64775000	53042	316128839	20
10	4	Allerson	2013	Infection Dynamics of Pandemic 2009 H1N1 Influenza Virus in a Two-Site Swine Herd	Transbound Emerg Dis	347	5	Site 2 Sampling 5	NA	NA	NA	NA	60	0	0	0	nasal swabs	RT-PCR	Isolation MDCK	NA	influenza A	H1N1pdm-reass	longitudinal	2	2	farm	2010	2010	1	2010-2016	Post-pdm09	USA	North America	9147420	64775000	53042	316128839	20
11	5	Amorim	2013	Influenza A virus infection of healthy piglets in an abattoir in Brazil: animal-human interface and risk for interspecies transmission	Mem Inst Oswaldo Cruz	88	5	NA	NA	NA	NA	NA	330	30	9	9.1	tracheal swab	RT-PCR	Sequencing	NA	influenza A	Other/NA	surveillance	0	0	slaughterhouse	2009	2011	3	2010-2016	Post-pdm09	Brazil	Latin America	8358140	36743593	11208.1	200361925	18
12	7	Awosanya	2013	Prevalence and correlates of influenza-A in piggery workers and pigs in two communities in Lagos, Nigeria	Pan Afr Med J	95	5	NA	NA	NA	NA	NA	281	0	0	0	nasal swab	RT-PCR	NA	NA	influenza A	Other/NA	cross-sectional	NA	0	other/NA	2010	2010	1	2010-2016	Post-pdm09	Nigeria	Africa	910770	8080000	3005.51	173615345	5
13	8	Barigazzi	2003	Swine influenza in Italy	Vet Res Commun	101	5	Number of isolation from outbreaks of acute respiratory disease	409	73	17.8	17.8	NA	NA	NA	NA	nasal swabs, lung	Isolation	NA	NA	H1N1, H1N2, H3N2	Other/NA	surveillance	1	1	farm	1998	2001	4	2000-2004	Pre-pdm09	Italy	Europe	294140	8661500	35685.6	59831093	14
14	8	Barigazzi	2003	Swine influenza in Italy	Vet Res Commun	107	5	Number of isolations from samples sent to laboratory	825	103	12.5	12.5	NA	NA	NA	NA	nasal swabs, lung	Isolation	NA	NA	H1N1, H1N2, H3N2	Other/NA	surveillance	1	1	farm	1998	2001	4	2000-2004	Pre-pdm09	Italy	Europe	294140	8661500	35685.6	59831093	14
15	9	Baudon	2015	Detection of Novel Reassortant Influenza A (H3N2) and H1N1 2009 Pandemic Viruses in Swine in Hanoi, Vietnam	Zoonoses Public Health	302	5	virology	750	15	NA	2	NA	NA	NA	NA	nasal swabs	Isolation MDCK	NA	NA	H1N1, H3N2	H1N1pdm-reass	longitudinal	0	0	slaughterhouse	2013	2013	1	2010-2016	Post-pdm09	Vietnam	Asia	310070	26261400	1910.51	89708900	29
16	10	Beaudouin	2012	Characterization of influenza a outbreaks in Minnesota swine herds and measures taken to reduce the risk of zoonotic transmission	Zoonoses Public Health	75	5	NA	NA	NA	NA	NA	3140	426	14	13.6	nasal swabs, tissues	RT-PCR	NA	NA	influenza A	Other/NA	surveillance	1	1	farm	2007	2009	3	2010-2016	Pre-pdm09	USA	North America	9147420	64775000	53042	316128839	20
17	11	Bi	2010	Novel swine influenza virus reassortants in pigs, China	Emerg Infect Dis	121	5	NA	3546	29	NA	0.8	NA	NA	NA	NA	nasal and tracheal swabs	Isolation Eggs	HI, NA-inhibition	Sequencing	H1N1, H1N2, H3N2	Other/NA	surveillance	0	0	slaughterhouse	2006	2009	4	2010-2016	Pre-pdm09	China	Asia	9388211	482398000	6807.43	1357380000	36
18	14	Bliss	2016	Prevalence of Influenza A Virus in Exhibition Swine during Arrival at Agricultural Fairs	Zoonoses Public Health	303	5	NA	3547	53	1.5	1.5	3547	188	5.3	5.3	snout wipes	RT-PCR	Isolation MDCK	NA	influenza A	H1N1pdm-reass	surveillance	0	0	agricultural fair	2014	2014	1	2010-2016	Post-pdm09	USA	North America	9147420	64775000	53042	316128839	20
19	15	Bowman	2012	Subclinical influenza virus A infections in pigs exhibited at agricultural fairs, Ohio, USA, 2009-2011	Emerg Infect Dis	11	5	NA	1073	155	14.4	14.4	NA	NA	NA	NA	nasal swab	Isolation MDCK	RT-PCR	NA	H1N2, H3N2	H1N1pdm-reass	surveillance	2	2	agricultural fair	2009	2011	3	2010-2016	Post-pdm09	USA	North America	9147420	64775000	53042	316128839	20
20	17	Bowman	2014	Swine-to-human transmission of influenza A(H3N2) virus at agricultural fairs, Ohio, USA, 2012	Emerg Infect Dis	8	5	NA	834	161	19.3	19.3	834	223	27	26.7	nasal swab	RT-PCR	Isolation MDCK	Sequencing	H1N1, H3N2	H1N1pdm-reass	surveillance	2	2	agricultural fair	2012	2012	1	2010-2016	Post-pdm09	USA	North America	9147420	64775000	53042	316128839	20
21	18	Brown	1994	Isolation of an influenza A virus of unusual subtype (H1N7) from pigs in England, and the subsequent experimental transmission from pig to pig	Vet Microbiol	76	5	NA	6	2	NA	33.3	NA	NA	NA	NA	nasal swabs	Isolation Eggs	HI, NA-inhibition	NA	H1N7	Other/NA	outbreak	1	1	farm	1992	1992	1	1990-1994	Pre-pdm09	UK	Europe	241930	4885000	41781.1	64097085	8
22	21	Campitelli	1997	Continued evolution of H1N1 and H3N2 influenza viruses in pigs in Italy	Virology	61	5	NA	405	84	NA	20.7	NA	NA	NA	NA	nasal and tracheal swabs	Isolation Eggs	HI, NA-inhibition	NA	H1N1, H3N2	Other/NA	surveillance	1	1	other/NA	1992	1995	4	1995-1999	Pre-pdm09	Italy	Europe	294140	8661500	35685.6	59831093	14
23	25	Charoenvisal	2013	Genetic characterization of Thai swine influenza viruses after the introduction of pandemic H1N1 2009	Virus Genes	74	5	NA	1335	23	1.75	1.7	1335	23	1.75	1.7	nasal swabs, lung	RT-PCR	Isolation MDCK, Eggs	Sequencing	H1N1, H1N2, H3N2	H1N1pdm-reass	surveillance	1	1	farm	2010	2012	3	2010-2016	Post-pdm09	Thailand	Asia	510890	7923654	5778.98	67010502	12
24	27	Chen	2013	Co-circulation of pandemic 2009 H1N1, classical swine H1N1 and avian-like swine H1N1 influenza viruses in pigs in China	Infect Genet Evol	86	5	virology	1850	10	NA	0.5	NA	NA	NA	NA	nasal swab	Isolation MDCK, Eggs	RT-PCR	HI	H1N1	H1N1pdm-reass	surveillance	NA	0	slaughterhouse	2009	2010	2	2010-2016	Post-pdm09	China	Asia	9388211	482398000	6807.43	1357380000	36
25	28	Chen	2014	Identification of four genotypes of H3N2 swine influenza virus in pigs from southern China	Arch Virol	83	5	NA	800	9	NA	1.1	NA	NA	NA	NA	nasal swab	Isolation MDCK	NA	NA	H1N1, H1N2, H3N2	Other/NA	surveillance	1	1	other/NA	2010	2012	3	2010-2016	Post-pdm09	China	Asia	9388211	482398000	6807.43	1357380000	36
26	29	Chiapponi	2014	Temporal insight into the natural generation of a new reassortant porcine influenza virus in a swine holding	Vet Microbiol	349	5	outbreak 1	NA	NA	NA	NA	10	2	20	20	nasal swabs	RT-PCR	Isolation MDCK, Eggs	Sequencing	influenza A	H1N1pdm-reass	outbreak	1	1	farm	2012	2012	1	2010-2016	Post-pdm09	Italy	Europe	294140	8661500	35685.6	59831093	14
27	29	Chiapponi	2014	Temporal insight into the natural generation of a new reassortant porcine influenza virus in a swine holding	Vet Microbiol	350	5	outbreak 2	NA	NA	NA	NA	36	4	8	11.1	nasal swabs	RT-PCR	Isolation MDCK, Eggs	Sequencing	influenza A	H1N1pdm-reass	outbreak	1	1	farm	2012	2012	1	2010-2016	Post-pdm09	Italy	Europe	294140	8661500	35685.6	59831093	14
28	29	Chiapponi	2014	Temporal insight into the natural generation of a new reassortant porcine influenza virus in a swine holding	Vet Microbiol	351	5	outbreak 3	NA	NA	NA	NA	22	2	9	9.1	nasal swabs	RT-PCR	Isolation MDCK, Eggs	Sequencing	influenza A	H1N1pdm-reass	outbreak	1	1	farm	2013	2013	1	2010-2016	Post-pdm09	Italy	Europe	294140	8661500	35685.6	59831093	14
29	29	Chiapponi	2014	Temporal insight into the natural generation of a new reassortant porcine influenza virus in a swine holding	Vet Microbiol	352	5	outbreak 4	NA	NA	NA	NA	13	1	7	7.7	nasal swabs	RT-PCR	Isolation MDCK, Eggs	Sequencing	influenza A	H1N1pdm-reass	outbreak	1	1	farm	2013	2013	1	2010-2016	Post-pdm09	Italy	Europe	294140	8661500	35685.6	59831093	14
30	29	Chiapponi	2014	Temporal insight into the natural generation of a new reassortant porcine influenza virus in a swine holding	Vet Microbiol	353	5	outbreak 5	NA	NA	NA	NA	25	1	4	4	nasal swabs	RT-PCR	Isolation MDCK, Eggs	Sequencing	influenza A	H1N1pdm-reass	outbreak	1	1	farm	2013	2013	1	2010-2016	Post-pdm09	Italy	Europe	294140	8661500	35685.6	59831093	14
31	30	Choi	2002	Prevalence of swine influenza virus subtypes on swine farms in the United States	Arch Virol	90	5	virology	3561	1124	31.7	31.6	NA	NA	NA	NA	nasal swabs, lung	Isolation MDCK	HI	RT-PCR, sequencing	H1N1, H1N2, H3N2	Other/NA	surveillance	1	1	farm	1998	2001	4	2000-2004	Pre-pdm09	USA	North America	9147420	64775000	53042	316128839	20
32	31	Choi	2003	Isolation and genetic characterization of H1N2 subtype of influenza A virus from pigs in Korea	Journal of Bacteriology and Virology	92	5	NA	NA	NA	NA	NA	180	52	NA	28.9	nasal swab	RT-PCR	Isolation Eggs	Sequencing	H1, H3	Other/NA	surveillance	1	1	farm	2001	2002	2	2000-2004	Pre-pdm09	South Korea	Asia	97350	9912204	25977	50219669	20
33	32	Choi	2003	Retrospective analysis of etiologic agents associated with respiratory diseases in pigs	Can Vet J	91	5	NA	2872	636	22.1	22.1	NA	NA	NA	NA	lung	Isolation MDCK	HI	RT-PCR	H1N1, H1N2, H3N2	Other/NA	retrospective study	1	1	farm	2000	2001	2	2000-2004	Pre-pdm09	USA	North America	9147420	64775000	53042	316128839	20
34	33	Choi	2004	Detection and isolation of H1N1 influenza virus from pigs in Korea	Vet Rec	89	5	NA	267	58	22	21.7	NA	NA	NA	NA	lung	Isolation MDCK	RT-PCR	Sequencing	H1N1	Other/NA	surveillance	1	1	farm	2000	2002	3	2000-2004	Pre-pdm09	South Korea	Asia	97350	9912204	25977	50219669	20
35	35	Choi	2015	Live Animal Markets in Minnesota: A Potential Source for Emergence of Novel Influenza A Viruses and Interspecies Transmission	Clin Infect Dis	304	5	NA	150	72	NA	48	150	70	NA	46.7	lung	RT-PCR	Isolation MDCK	NA	influenza A	H1N1pdm-reass	surveillance	0	0	market	2012	2013	2	2010-2016	Post-pdm09	USA	North America	9147420	64775000	53042	316128839	20
36	36	Ciacci-Zanella	2015	Influenza A virus infection in Brazilian swine herds following the introduction of pandemic 2009 H1N1	Vet Microbiol	306	5	virology	NA	NA	NA	NA	1440	39	2.7	2.7	nasal swabs	RT-PCR	NA	NA	influenza A	H1N1pdm-reass	cross-sectional	1	1	farm	2011	2011	1	2010-2016	Post-pdm09	Brazil	Latin America	8358140	36743593	11208.1	200361925	18
37	37	Cong	2010	Reassortant between human-Like H3N2 and avian H5 subtype influenza A viruses in pigs: a potential public health risk	PloS One	93	5	NA	279	3	NA	1.1	NA	NA	NA	NA	nasopharyngeal swabs	Isolation MDCK	HI, NA-inhibition	Sequencing	H3N2	Other/NA	surveillance	1	1	farm	2007	2008	2	2010-2016	Pre-pdm09	China	Asia	9388211	482398000	6807.43	1357380000	36
38	39	Corzo	2012	Observations regarding influenza A virus shedding in a swine breeding farm after mass vaccination	Journal of Swine Health and Production	77	5	NA	10	2	NA	20	10	4	NA	40	nasal swabs	RT-PCR	Isolation	NA	H1N2	Other/NA	outbreak	1	1	farm	2010	2010	1	2010-2016	Post-pdm09	USA	North America	9147420	64775000	53042	316128839	20
39	40	Corzo	2013	Active surveillance for influenza A virus among swine, midwestern United States, 2009-2011	Emerg Infect Dis	354	5	NA	16170	178	NA	1.1	16170	746	4.6	4.6	nasal swabs	RT-PCR	Isolation	NA	influenza A	H1N1pdm-reass	surveillance	2	2	farm	2009	2011	3	2010-2016	Post-pdm09	USA	North America	9147420	64775000	53042	316128839	20
40	42	Couacy-Hymann	2012	Surveillance for influenza viruses in poultry and swine, west Africa, 2006-2008	Emerg Infect Dis	84	5	virology	NA	NA	NA	NA	1548	0	0	0	nasal swabs	RT-PCR	NA	NA	influenza A	Other/NA	surveillance	NA	0	other/NA	2009	2010	2	2010-2016	Post-pdm09	Côte d'Ivoire	Africa	318000	362693	1528.94	20316086	2
41	42	Couacy-Hymann	2012	Surveillance for influenza viruses in poultry and swine, west Africa, 2006-2008	Emerg Infect Dis	94	5	virology	NA	NA	NA	NA	62	0	0	0	nasal swabs	RT-PCR	NA	NA	influenza A	Other/NA	surveillance	NA	0	slaughterhouse	2009	2010	2	2010-2016	Post-pdm09	Benin	Africa	112760	414000	804.692	10323474	4
42	44	Davidson	2014	Seroepidemiology Survey and Isolation of Swine Influenza Viruses from Subclinical Infections in Israel During the Years 2009-2011	Israel Journal of Veterinary Medicine	96	5	virology	125	4	NA	3.2	125	5	NA	4	nasal swabs	RT-PCR	Isolation Eggs	NA	H1N1, H3N2	Other/NA	surveillance	0	0	farm	2009	2011	3	2010-2016	Post-pdm09	Israel	Africa	21640	176900	36050.7	8059400	2
43	46	Diaz	2015	Association between Influenza A Virus Infection and Pigs Subpopulations in Endemically Infected Breeding Herds	PloS One	308	5	NA	4190	124	NA	3	4190	324	7.7	7.7	nasal swabs	RT-PCR	Isolation MDCK	NA	influenza A	Other/NA	longitudinal	1	1	farm	2011	2012	2	2010-2016	Post-pdm09	USA	North America	9147420	64775000	53042	316128839	20
44	47	Dibarbora	2013	Swine influenza: clinical, serological, pathological, and virological cross-sectional studies in nine farms in Argentina	Influenza Other Respir Viruses	97	5	virology	2430	17	NA	0.7	405	33	8.14	8.1	nasal swabs, lung	RT-PCR	Isolation MDCK	NA	H1N1, H3N2	H1N1pdm-reass	cross-sectional	1	1	farm	2012	2012	1	2010-2016	Post-pdm09	Argentina	Latin America	2736690	2440000	14715.2	41446246	6
45	52	Forberg	2013	Swine influenza in Norway: a distinct lineage of influenza A(H1N1)pdm09 virus	Influenza Other Respir Viruses	100	5	farms	NA	NA	NA	NA	191	59	NA	30.9	nasal swabs	RT-PCR	Sequencing	NA	influenza A	H1N1pdm-reass	surveillance	1	1	farm	2011	2013	3	2010-2016	Post-pdm09	Norway	Europe	365268	848063	100898	5084190	17
46	52	Forberg	2013	Swine influenza in Norway: a distinct lineage of influenza A(H1N1)pdm09 virus	Influenza Other Respir Viruses	99	5	boar station	NA	NA	NA	NA	316	160	NA	50.6	nasal swabs	RT-PCR	Sequencing	NA	influenza A	H1N1pdm-reass	surveillance	2	2	other/NA	2011	2011	1	2010-2016	Post-pdm09	Norway	Europe	365268	848063	100898	5084190	17
47	57	Gray	2012	Influenza A(H1N1)pdm09 virus among healthy show pigs, United States	Vet Microbiol	102	5	NA	149	7	NA	4.7	149	12	NA	8.1	nasal swabs	RT-PCR	Isolation MDCK	Sequencing	H1N1, H1N2	H1N1pdm-reass	surveillance	0	0	agricultural fair	2008	2009	2	2010-2016	Pre-pdm09	USA	North America	9147420	64775000	53042	316128839	20
48	61	Guan	1996	Emergence of avian H1N1 influenza viruses in pigs in China	J Virol	103	5	virology	3100	525	16.9	16.9	NA	NA	NA	NA	tracheal swabs	Isolation Eggs	HI, NA-inhibition	Sequencing	H1N1	Other/NA	surveillance	0	0	slaughterhouse	1993	1994	2	1995-1999	Pre-pdm09	China	Asia	9388211	482398000	6807.43	1357380000	36
49	62	Guercio	2012	Pandemic influenza A/H1N1 virus in a swine farm house in Sicily, Italy	J Environ Biol	355	5	outbreak	13	2	NA	15.4	13	2	NA	15.4	nasopharyngeal swabs	RT-PCR	Isolation MDCK, Eggs	NA	influenza A	H1N1pdm-reass	outbreak	1	1	farm	2009	2009	1	2010-2016	Post-pdm09	Italy	Europe	294140	8661500	35685.6	59831093	14
50	62	Guercio	2012	Pandemic influenza A/H1N1 virus in a swine farm house in Sicily, Italy	J Environ Biol	356	5	monitoring	13	0	NA	0	13	0	NA	0	nasopharyngeal swabs	RT-PCR	Isolation MDCK, Eggs	NA	influenza A	H1N1pdm-reass	monitoring	0	0	farm	2009	2009	1	2010-2016	Post-pdm09	Italy	Europe	294140	8661500	35685.6	59831093	14
51	63	Han	2012	Identification of reassortant pandemic H1N1 influenza virus in Korean pigs	J Microbiol Biotechnol	104	5	NA	313	2	NA	0.6	313	25	NA	8	lung, tonsil, nasal swabs	RT-PCR	Isolation MDCK	Sequencing	H1N2	H1N1pdm-reass	surveillance	2	2	farm	2010	2010	1	2010-2016	Post-pdm09	South Korea	Asia	97350	9912204	25977	50219669	20
52	64	Hansen	2010	An investigation of the pathology and pathogens associated with porcine respiratory disease complex in Denmark	J Comp Pathol	105	5	cases	NA	NA	NA	NA	148	3	NA	2	lung	RT-PCR	NA	NA	influenza A	Other/NA	case-control	1	1	slaughterhouse	2006	2007	2	2010-2016	Pre-pdm09	Denmark	Europe	42430	12075750	59818.6	5613706	215
53	64	Hansen	2010	An investigation of the pathology and pathogens associated with porcine respiratory disease complex in Denmark	J Comp Pathol	106	5	controls	NA	NA	NA	NA	60	1	2	1.7	lung	RT-PCR	NA	NA	influenza A	Other/NA	case-control	0	0	slaughterhouse	2006	2007	2	2010-2016	Pre-pdm09	Denmark	Europe	42430	12075750	59818.6	5613706	215
54	65	Harder	2013	Expanded cocirculation of stable subtypes, emerging lineages, and new sporadic reassortants of porcine influenza viruses in swine populations in Northwest Germany	J Virol	108	5	study A	NA	NA	NA	NA	401	86	21.4	21.4	lung	RT-PCR	Isolation MDCK	Sequencing	influenza A	H1N1pdm-reass	surveillance	1	1	farm	2009	2010	2	2010-2016	Post-pdm09	Germany	Europe	348540	27690100	46251.4	80621788	34
55	65	Harder	2013	Expanded cocirculation of stable subtypes, emerging lineages, and new sporadic reassortants of porcine influenza viruses in swine populations in Northwest Germany	J Virol	109	5	study B	NA	NA	NA	NA	2696	658	24.4	24.4	nasal swabs	RT-PCR	Isolation MDCK	Sequencing	influenza A	H1N1pdm-reass	surveillance	2	2	farm	2011	2012	2	2010-2016	Post-pdm09	Germany	Europe	348540	27690100	46251.4	80621788	34
56	66	He	2013	Isolation and characterization of two H5N1 influenza viruses from swine in Jiangsu Province of China	Arch Virol	110	5	NA	267	4	NA	1.5	NA	NA	NA	NA	nasal swabs	Isolation Eggs	Sequencing	NA	H5N1, H9N2, H6N6	Other/NA	surveillance	0	0	farm	2008	2009	2	2010-2016	Pre-pdm09	China	Asia	9388211	482398000	6807.43	1357380000	36
57	66	He	2013	Isolation and characterization of two H5N1 influenza viruses from swine in Jiangsu Province of China	Arch Virol	130	5	NA	840	2	NA	0.2	NA	NA	NA	NA	nasal swabs	Isolation Eggs	Sequencing	NA	H9N2	Other/NA	surveillance	0	0	slaughterhouse	2008	2009	2	2010-2016	Pre-pdm09	China	Asia	9388211	482398000	6807.43	1357380000	36
58	67	Hofshagen	2009	Pandemic influenza A(H1N1)v: human to pig transmission in Norway?	Euro Surveill	357	5	NA	NA	NA	NA	NA	20	18	NA	90	nasal swabs	RT-PCR	NA	NA	influenza A	H1N1pdm-reass	outbreak	2	2	farm	2009	2009	1	2005-2009	Post-pdm09	Norway	Europe	365268	848063	100898	5084190	17
59	68	Holyoake	2011	The first identified case of pandemic H1N1 influenza in pigs in Australia	Aust Vet J	358	5	outbreak	NA	NA	NA	NA	13	12	NA	92.3	nasal swabs	RT-PCR	NA	NA	influenza A	H1N1pdm-reass	outbreak	1	1	farm	2009	2009	1	2010-2016	Post-pdm09	Australia	Oceania	7682300	2098147	67463	23130900	9
60	68	Holyoake	2011	The first identified case of pandemic H1N1 influenza in pigs in Australia	Aust Vet J	359	5	monitoring 1	NA	NA	NA	NA	20	0	NA	0	nasal swabs	RT-PCR	NA	NA	influenza A	H1N1pdm-reass	monitoring	0	0	farm	2009	2009	1	2010-2016	Post-pdm09	Australia	Oceania	7682300	2098147	67463	23130900	9
61	68	Holyoake	2011	The first identified case of pandemic H1N1 influenza in pigs in Australia	Aust Vet J	360	5	monitoring 2	NA	NA	NA	NA	37	23	0.62	62.2	nasal swabs	RT-PCR	NA	NA	influenza A	H1N1pdm-reass	monitoring	2	2	farm	2009	2009	1	2010-2016	Post-pdm09	Australia	Oceania	7682300	2098147	67463	23130900	9
62	68	Holyoake	2011	The first identified case of pandemic H1N1 influenza in pigs in Australia	Aust Vet J	361	5	monitoring 3	NA	NA	NA	NA	32	0	0	0	nasal swabs	RT-PCR	NA	NA	influenza A	H1N1pdm-reass	monitoring	2	2	farm	2010	2010	1	2010-2016	Post-pdm09	Australia	Oceania	7682300	2098147	67463	23130900	9
63	69	Howard	2011	Reassortant Pandemic (H1N1) 2009 virus in pigs, United Kingdom	Emerg Infect Dis	362	5	NA	NA	NA	NA	NA	6	4	NA	66.7	nasal swabs	RT-PCR	NA	NA	influenza A	H1N1pdm-reass	outbreak	1	1	farm	2010	2010	1	2010-2016	Post-pdm09	UK	Europe	241930	4885000	41781.1	64097085	8
64	71	Jimenez	2014	Association of swine influenza H1N1 pandemic virus (SIV-H1N1p) with porcine respiratory disease complex in sows from commercial pig farms in Colombia	Virol Sin	112	5	virology	275	7	NA	2.5	NA	NA	NA	NA	nasal swabs, bronchial lavage, lung	Isolation MDCK, Eggs	RT-PCR	Sequencing	H1N1	H1N1pdm-reass	surveillance	1	1	farm	2009	2009	1	2010-2016	Post-pdm09	Colombia	Latin America	1109500	5340890	7831.22	48321405	11
65	72	Jo	2007	Genetic and antigenic characterization of swine H1N2 influenza viruses isolated from Korean pigs	J Microbiol Biotechnol	113	5	virology	30	4	NA	13.3	NA	NA	NA	NA	lung	Isolation MDCK	Sequencing	NA	H1N2	Other/NA	surveillance	1	1	farm	2005	2006	2	2005-2009	Pre-pdm09	South Korea	Asia	97350	9912204	25977	50219669	20
66	74	Jung	2007	Evidence of the co-circulation of influenza H1N1, H1N2 and H3N2 viruses in the pig population of Korea	Vet Rec	114	5	NA	159	33	20.7	20.8	NA	NA	NA	NA	lung	Isolation MDCK	RT-PCR	NA	H1N1, H1N2, H3N2	Other/NA	surveillance	1	1	farm	2003	2004	2	2005-2009	Pre-pdm09	South Korea	Asia	97350	9912204	25977	50219669	20
67	76	Kaplan	2015	Influenza Virus Surveillance in Coordinated Swine Production Systems, United States	Emerg Infect Dis	310	5	NA	NA	NA	NA	NA	14954	741	5	5	nasal swabs	RT-PCR	NA	NA	influenza A	Other/NA	surveillance	0	0	farm	2012	2013	2	2010-2016	Post-pdm09	USA	North America	9147420	64775000	53042	316128839	20
68	77	Karlsson	2013	Prevalence and characterization of influenza viruses in diverse species in Los Llanos, Colombia	Emerging Microbes and Infections	115	5	NA	NA	NA	NA	NA	678	91	13.42	13.4	nasopharyngeal swabs	RT-PCR	Isolation MDCK, Eggs	Sequencing	influenza A	H1N1pdm-reass	surveillance	0	0	other/NA	2010	2012	3	2010-2016	Post-pdm09	Colombia	Latin America	1109500	5340890	7831.22	48321405	11
69	78	Katsuda	1995	Antigenic and genetic analyses of the hemagglutinin of influenza viruses isolated from pigs in 1993	J Vet Med Sci	63	5	virology	280	3	NA	1.1	NA	NA	NA	NA	nasal swabs	Isolation Eggs	HI	Sequencing	H3N2	Other/NA	surveillance	0	0	slaughterhouse	1993	1993	1	1995-1999	Pre-pdm09	Japan	Asia	364560	9685000	38633.7	127338621	8
70	79	Katsuda	1995	Antigenic and genetic characteristics of H1N1 human influenza virus isolated from pigs in Japan	J Gen Virol	62	5	NA	280	2	NA	0.7	NA	NA	NA	NA	nasal swabs	Isolation Eggs	HI, NA-inhibition	Sequencing	H1N1	Other/NA	surveillance	NA	0	slaughterhouse	1992	1992	1	1995-1999	Pre-pdm09	Japan	Asia	364560	9685000	38633.7	127338621	8
71	81	Killian	2013	Simultaneous infection of pigs and people with triple-reassortant swine influenza virus H1N1 at a U.S. county fair	Zoonoses Public Health	116	5	NA	8	7	NA	87.5	NA	NA	NA	NA	nasal swabs	Isolation swine kidney cells	Isolation MDCK, Eggs	Sequencing	H1N1	Other/NA	outbreak	1	1	agricultural fair	2007	2007	1	2010-2016	Pre-pdm09	USA	North America	9147420	64775000	53042	316128839	20
72	82	Kim	2014	Phylogenetic analysis of a swine influenza A(H3N2) virus isolated in Korea in 2012	PloS One	117	5	NA	108	1	NA	0.9	NA	NA	NA	NA	nasopharyngeal swabs	Isolation MDCK	Isolation Eggs	NA	H3N2	Other/NA	surveillance	NA	0	other/NA	2011	2012	2	2010-2016	Post-pdm09	South Korea	Asia	97350	9912204	25977	50219669	20
73	83	Kirunda	2014	Prevalence of influenza A viruses in livestock and free-living waterfowl in Uganda	BMC Vet Res	118	5	virology	511	0	NA	0	511	7	1.4	1.4	nasal swabs	RT-PCR	Isolation Eggs	NA	influenza A	Other/NA	cross-sectional	0	0	other/NA	2010	2011	2	2010-2016	Post-pdm09	Uganda	Africa	199810	2497600	657.371	37578876	7
74	84	Kobayashi	2013	Novel reassortant influenza A(H1N2) virus derived from A(H1N1)pdm09 virus isolated from swine, Japan, 2012	Emerg Infect Dis	119	5	NA	109	1	NA	0.9	NA	NA	NA	NA	nasal swabs	Isolation MDCK	HI	Sequencing	H1N2	Other/NA	surveillance	0	0	slaughterhouse	2011	2012	2	2010-2016	Post-pdm09	Japan	Asia	364560	9685000	38633.7	127338621	8
75	86	Kong	2011	Isolation and phylogenetic analysis of h9n2 swine influenza virus from sick pigs in Southern China in 2010	Journal of Animal and Veterinary Advances	120	5	NA	NA	NA	NA	NA	246	87	NA	35.4	nasopharyngeal swabs	RT-PCR	Isolation Eggs	Sequencing	influenza A	Other/NA	surveillance	1	1	farm	2010	2010	1	2010-2016	Post-pdm09	China	Asia	9388211	482398000	6807.43	1357380000	36
76	87	Kowalczyk	2010	Phylogenetic analysis of swine influenza viruses isolated in Poland	Pol J Vet Sci	122	5	NA	297	41	NA	13.8	297	106	36.4	35.7	nasal swabs, lung	RT-PCR	Isolation Eggs	Sequencing	H1N1, H3N2	Other/NA	surveillance	1	1	farm	2004	2008	5	2010-2016	Pre-pdm09	Poland	Europe	306220	11162472	13653.7	38530725	29
77	88	Kwon	2011	Genetic characterization of H7N2 influenza virus isolated from pigs	Vet Microbiol	123	5	NA	532	5	0.94	0.9	NA	NA	NA	NA	lung	Isolation Eggs	RT-PCR	Sequencing	influenza A	Other/NA	surveillance	0	0	slaughterhouse	2001	2001	1	2010-2016	Pre-pdm09	South Korea	Asia	97350	9912204	25977	50219669	20
78	89	Kyriakis	2011	Virological surveillance and preliminary antigenic characterization of influenza viruses in pigs in five European countries from 2006 to 2008	Zoonoses Public Health	124	5	Belgium	29	20	69	69	NA	NA	NA	NA	lung, trachea, nasal swabs	Isolation on eggs or MDCK or CaCo-2 cells	RT-PCR and/or HI and/or NI	NA	H1N1, H1N2, H3N2	Other/NA	outbreak	1	1	farm	2006	2008	3	2010-2016	Pre-pdm09	Belgium	Europe	30280	6592978	46929.6	11195138	59
79	89	Kyriakis	2011	Virological surveillance and preliminary antigenic characterization of influenza viruses in pigs in five European countries from 2006 to 2008	Zoonoses Public Health	125	5	United Kingdom	378	19	5	5	NA	NA	NA	NA	lung, trachea, nasal swabs	Isolation on eggs or MDCK or CaCo-2 cells	RT-PCR and/or HI and/or NI	NA	H1N1, H1N2, H3N2	Other/NA	outbreak	1	1	farm	2006	2008	3	2010-2016	Pre-pdm09	UK	Europe	241930	4885000	41781.1	64097085	8
80	89	Kyriakis	2011	Virological surveillance and preliminary antigenic characterization of influenza viruses in pigs in five European countries from 2006 to 2008	Zoonoses Public Health	126	5	Italy	175	40	23	22.9	NA	NA	NA	NA	lung, trachea, nasal swabs	Isolation on eggs or MDCK or CaCo-2 cells	RT-PCR and/or HI and/or NI	NA	H1N1, H1N2, H3N2	Other/NA	outbreak	1	1	farm	2006	2008	3	2010-2016	Pre-pdm09	Italy	Europe	294140	8661500	35685.6	59831093	14
81	89	Kyriakis	2011	Virological surveillance and preliminary antigenic characterization of influenza viruses in pigs in five European countries from 2006 to 2008	Zoonoses Public Health	127	5	France	58	38	NA	65.5	NA	NA	NA	NA	lung, trachea, nasal swabs	Isolation on eggs or MDCK or CaCo-2 cells	RT-PCR and/or HI and/or NI	NA	H1N1, H1N2, H3N2	Other/NA	outbreak	1	1	farm	2006	2008	3	2010-2016	Pre-pdm09	France	Europe	547561	13487588	42560.4	66028467	20
82	89	Kyriakis	2011	Virological surveillance and preliminary antigenic characterization of influenza viruses in pigs in five European countries from 2006 to 2008	Zoonoses Public Health	128	5	Spain	186	30	16	16.1	NA	NA	NA	NA	lung, trachea, nasal swabs	Isolation on eggs or MDCK or CaCo-2 cells	RT-PCR and/or HI and/or NI	NA	H1N1, H1N2, H3N2	Other/NA	outbreak	1	1	farm	2006	2008	3	2010-2016	Pre-pdm09	Spain	Europe	498800	25494720	29882.1	46647421	55
83	92	Lange	2013	Reassortants of the pandemic (H1N1) 2009 virus and establishment of a novel porcine H1N2 influenza virus, lineage in Germany	Vet Microbiol	129	5	virology	2729	66	NA	2.4	NA	NA	NA	NA	nasal swabs	RT-PCR	Isolation MDCK, Eggs	Sequencing	H1N1, H1N2, H3N1	H1N1pdm-reass	surveillance	1	1	other/NA	2009	2012	4	2010-2016	Post-pdm09	Germany	Europe	348540	27690100	46251.4	80621788	34
84	94	Lee	2008	Phylogenetic analysis of swine influenza viruses recently isolated in Korea	Virus Genes	2	5	NA	175	4	NA	2.3	NA	NA	NA	NA	nasal swabs, lung	Isolation MDCK, Eggs	RT-PCR, HI	Sequencing	H1N1, H1N2, H3N2	Other/NA	surveillance	1	1	farm	2005	2006	2	2005-2009	Pre-pdm09	South Korea	Asia	97350	9912204	25977	50219669	20
85	96	Lekcharoensuk	2010	First whole genome characterization of swine influenza virus subtype H3N2 in Thailand	Vet Microbiol	3	5	NA	120	7	NA	5.8	NA	NA	NA	NA	nasal swabs, lung	Isolation MDCK	IPMA	RT-PCR, sequencing	H3N2	Other/NA	surveillance	1	1	other/NA	2004	2006	3	2010-2016	Pre-pdm09	Thailand	Asia	510890	7923654	5778.98	67010502	12
86	97	Li	2004	Serological and virologic surveillance of swine influenza in China from 2000 to 2003	International Congress Series	4	5	virology	1985	116	NA	5.8	NA	NA	NA	NA	lung, trachea, nasal swabs	Isolation Eggs	AGP	HI, NA-inhibition	H1N1, H1N2, H3N2, H9N2, H5N2	Other/NA	surveillance	NA	0	farm	2000	2003	4	2000-2004	Pre-pdm09	China	Asia	9388211	482398000	6807.43	1357380000	36
87	99	Liu	2009	Emergence of European avian influenza virus-like H1N1 swine influenza A viruses in China	J Clin Microbiol	78	5	NA	1344	14	NA	1	NA	NA	NA	NA	nasal swabs	Isolation Eggs	HI, NA-inhibition	Sequencing	H1N1, H3N2	Other/NA	surveillance	0	0	other/NA	2007	2008	2	2005-2009	Pre-pdm09	China	Asia	9388211	482398000	6807.43	1357380000	36
88	101	Loeffen	1999	Survey of infectious agents involved in acute respiratory disease in finishing pigs	Vet Rec	131	5	virology	32	8	NA	25	NA	NA	NA	NA	lung, tonsil	Isolation swine thyroid cells	HI	NA	H1, H3	Other/NA	surveillance	0	0	farm	1995	1996	2	1995-1999	Pre-pdm09	Netherlands	Europe	33720	12212300	50792.5	16804224	73
89	101	Loeffen	1999	Survey of infectious agents involved in acute respiratory disease in finishing pigs	Vet Rec	5	5	virology	64	32	NA	50	NA	NA	NA	NA	lung, tonsil	Isolation swine thyroid cells	HI	NA	H1, H3	Other/NA	outbreak	1	1	farm	1995	1996	2	1995-1999	Pre-pdm09	Netherlands	Europe	33720	12212300	50792.5	16804224	73
90	102	Lopez-Robles	2014	Serological and molecular prevalence of swine influenza virus on farms in northwestern Mexico	Vet Microbiol	6	5	virology	150	0	NA	0	150	25	16.6	16.7	nasal swabs	RT-PCR	Isolation MDCK	Sequencing	influenza A	Other/NA	cross-sectional	2	2	farm	2008	2009	2	2010-2016	Pre-pdm09	Mexico	Latin America	1943950	16201625	10307.3	122332399	13
91	106	Ma	2010	Identification and characterization of a highly virulent triple reassortant H1N1 swine influenza virus in the United States	Virus Genes	7	5	NA	NA	NA	NA	NA	90	90	NA	100	nasal swabs	RT-PCR	NA	NA	influenza A	Other/NA	outbreak	1	1	farm	2007	2007	1	2010-2016	Pre-pdm09	USA	North America	9147420	64775000	53042	316128839	20
92	109	Maldonado	2006	Evidence of the concurrent circulation of H1N2, H1N1 and H3N2 influenza A viruses in densely populated pig areas in Spain	Vet J	9	5	virology	225	22	9.8	9.8	NA	NA	NA	NA	lung	Isolation Eggs	HI	RT-PCR, sequencing	H1N1, H1N2, H3N2	Other/NA	surveillance	1	1	farm	2001	2004	4	2005-2009	Pre-pdm09	Spain	Europe	498800	25494720	29882.1	46647421	55
93	114	Meiners	2014	Field study on swine influenza virus (SIV) infection in weaner pigs and sows	Tierarztl Prax Ausg G Grosstiere Nutztiere	314	5	NA	NA	NA	NA	NA	1385	229	NA	16.5	nasal swabs	RT-PCR	NA	NA	influenza A	H1N1pdm-reass	surveillance	2	2	farm	2011	2011	1	2010-2016	Post-pdm09	Germany	Europe	348540	27690100	46251.4	80621788	34
94	115	Meseko	2014	Detection and isolation of 2009 pandemic influenza A/H1N1 virus in commercial piggery, Lagos Nigeria	Vet Microbiol	10	5	NA	227	29	12.8	12.8	227	31	13.7	13.7	nasal swabs	RT-PCR	Isolation Eggs	HI	influenza A	H1N1pdm-reass	surveillance	1	1	farm	2010	2012	3	2010-2016	Post-pdm09	Nigeria	Africa	910770	8080000	3005.51	173615345	5
95	119	Mores	2015	Pathological and microbiological aspects of respiratory disease in fattening pigs in Brazil	Pesquisa Veterinaria Brasileira	315	5	NA	NA	NA	NA	NA	75	2	2.8	2.8	lung	IHC	NA	NA	influenza A	Other/NA	NA	1	1	farm	2011	2012	2	2010-2016	Post-pdm09	Brazil	Latin America	8358140	36743593	11208.1	200361925	18
96	120	Nakhaturai	2008	Occurrence of swine influenza virus infection in swine with porcine respiratory disease complex	Southeast Asian J Trop Med Public Health	12	5	NA	106	3	2.8	2.8	NA	NA	NA	NA	nasal swabs, lung	Isolation MDCK	IFA	RT-PCR	H3N2	Other/NA	surveillance	1	1	farm	2006	2007	2	2005-2009	Pre-pdm09	Thailand	Asia	510890	7923654	5778.98	67010502	12
97	122	Nelson	2015	Influenza A Viruses of Human Origin in Swine, Brazil	Emerg Infect Dis	317	5	NA	1970	41	NA	2.1	1970	117	NA	5.9	nasal swabs, lung	RT-PCR	Isolation MDCK	NA	influenza A	H1N1pdm-reass	cross-sectional	1	1	farm	2009	2012	4	2010-2016	Post-pdm09	Brazil	Latin America	8358140	36743593	11208.1	200361925	18
98	123	Nelson	2015	Novel Human-like Influenza A Viruses Circulate in Swine in Mexico and Chile	PLoS Curr	316	5	NA	91	26	NA	28.6	91	50	NA	54.9	lung	RT-PCR	Isolation MDCK	NA	influenza A	H1N1pdm-reass	cross-sectional	1	1	farm	2012	2012	1	2010-2016	Post-pdm09	Chile	Latin America	743532	2793260	15732.3	17619708	16
99	125	Ngo	2012	Isolation of novel triple-reassortant swine H3N2 influenza viruses possessing the hemagglutinin and neuraminidase genes of a seasonal influenza virus in Vietnam in 2010	Influenza Other Respir Viruses	14	5	NA	759	6	NA	0.8	NA	NA	NA	NA	nasal swabs	RT-PCR	Isolation MDCK	Sequencing	H3N2	Other/NA	surveillance	0	0	farm	2010	2010	1	2010-2016	Post-pdm09	Vietnam	Asia	310070	26261400	1910.51	89708900	29
100	128	Njabo	2012	Pandemic A/H1N1/2009 influenza virus in swine, Cameroon, 2010	Vet Microbiol	15	5	virology	108	2	NA	1.9	108	2	NA	1.9	nasal swabs	RT-PCR	Isolation MDCK, Eggs	Sequencing	H1N1	H1N1pdm-reass	surveillance	2	2	other/NA	2009	2010	2	2010-2016	Post-pdm09	Cameroon	Africa	472710	1750000	1328.64	22253959	8
101	130	Nonthabenjawan	2015	Genetic diversity of swine influenza viruses in Thai swine farms, 2011-2014	Virus Genes	318	5	NA	2821	78	2.76	2.8	2821	188	6.66	6.7	nasal swabs	RT-PCR	Isolation MDCK, Eggs	NA	influenza A	H1N1pdm-reass	surveillance	0	0	farm	2011	2014	4	2010-2016	Post-pdm09	Thailand	Asia	510890	7923654	5778.98	67010502	12
102	132	Oladipo	2013	Isolation of influenza A and B viruses from pigs at Bodija Abattoir, Ibadan, Nigeria	Global Veterinaria	16	5	sick or dead	15	4	NA	26.7	NA	NA	NA	NA	nasal swabs	Isolation MDCK, Eggs	HI	NA	influenza A and B	Other/NA	surveillance	1	1	slaughterhouse	2010	2010	1	2010-2016	Post-pdm09	Nigeria	Africa	910770	8080000	3005.51	173615345	5
103	132	Oladipo	2013	Isolation of influenza A and B viruses from pigs at Bodija Abattoir, Ibadan, Nigeria	Global Veterinaria	17	5	healthy	78	12	NA	15.4	NA	NA	12.9	NA	nasal swabs	Isolation MDCK, Eggs	HI	NA	influenza A and B	Other/NA	surveillance	0	0	slaughterhouse	2010	2010	1	2010-2016	Post-pdm09	Nigeria	Africa	910770	8080000	3005.51	173615345	5
104	133	Olsen	2000	Virologic and serologic surveillance for human, swine and avian influenza virus infections among pigs in the north-central United States	Arch Virol	18	5	virology	1182	26	2.2	2.2	NA	NA	NA	NA	nasal swabs	Isolation Eggs	HI, NA-inhibition	Sequencing	H1N1	Other/NA	surveillance	NA	0	slaughterhouse	1997	1998	2	2000-2004	Pre-pdm09	USA	North America	9147420	64775000	53042	316128839	20
105	135	Ozawa	2015	Efficient isolation of Swine influenza viruses by age-targeted specimen collection	J Clin Microbiol	319	5	NA	209	11	5.3	5.3	NA	NA	NA	NA	nasal swabs	Isolation Eggs	NA	NA	influenza A	H1N1pdm-reass	NA	0	0	farm	2013	2013	1	2010-2016	Post-pdm09	Japan	Asia	364560	9685000	38633.7	127338621	8
106	136	Palzer	2008	Associations between pathogens in healthy pigs and pigs with pneumonia	Vet Rec	19	5	healthy	NA	NA	NA	NA	239	19	7.9	7.9	bronchial lavage	RT-PCR	NA	NA	influenza A	Other/NA	case-control	1	1	farm	2008	2008	1	2005-2009	Pre-pdm09	Germany	Europe	348540	27690100	46251.4	80621788	34
107	136	Palzer	2008	Associations between pathogens in healthy pigs and pigs with pneumonia	Vet Rec	20	5	sick	NA	NA	NA	NA	100	2	2	2	bronchial lavage	RT-PCR	NA	NA	influenza A	Other/NA	case-control	0	0	farm	2008	2008	1	2005-2009	Pre-pdm09	Germany	Europe	348540	27690100	46251.4	80621788	34
108	137	Papatsiros	2015	Erythema Multiforme Associated with Respiratory Disease in a Commercial Breeding Pig Herd	Viral Immunol	320	5	NA	NA	NA	NA	NA	11	1	NA	9.1	nasal swabs	RT-PCR	NA	NA	influenza A	Other/NA	outbreak	1	1	farm	2014	2014	1	2010-2016	Post-pdm09	Greece	Europe	128900	1077000	21965.9	11032328	10
109	138	Pascua	2008	Seroprevalence and genetic evolutions of swine influenza viruses under vaccination pressure in Korean swine herds	Virus Res	79	5	virology	687	40	5.82	5.8	NA	NA	NA	NA	nasal swabs, lung	Isolation MDCK, Eggs	RT-PCR	Sequencing	H1N1, H1N2, H3N2	Other/NA	surveillance	1	1	farm	2004	2007	4	2005-2009	Pre-pdm09	South Korea	Asia	97350	9912204	25977	50219669	20
110	139	Pascua	2013	Emergence of H3N2pM-like and novel reassortant H3N1 swine viruses possessing segments derived from the A (H1N1)pdm09 influenza virus, Korea	Influenza Other Respir Viruses	21	5	NA	1152	19	1.6	1.6	NA	NA	NA	NA	lung	Isolation MDCK	Sequencing	NA	H1N1, H1N2, H3N2, H3N1	Other/NA	surveillance	0	0	slaughterhouse	2011	2012	2	2010-2016	Post-pdm09	South Korea	Asia	97350	9912204	25977	50219669	20
111	141	Pereda	2010	Pandemic (H1N1) 2009 outbreak on pig farm, Argentina	Emerg Infect Dis	22	5	samples on a few days to 1 month post-outbreak	NA	NA	NA	NA	60	0	NA	0	nasal swabs	RT-PCR	NA	NA	influenza A	H1N1pdm-reass	monitoring	0	0	farm	2009	2009	1	2010-2016	Post-pdm09	Argentina	Latin America	2736690	2440000	14715.2	41446246	6
112	141	Pereda	2010	Pandemic (H1N1) 2009 outbreak on pig farm, Argentina	Emerg Infect Dis	23	5	samples at slaughter 1-2 weeks post outbreak	NA	NA	NA	NA	120	6	5	5	bronchial swabs	RT-PCR	NA	NA	influenza A	H1N1pdm-reass	monitoring	0	0	farm	2009	2009	1	2010-2016	Post-pdm09	Argentina	Latin America	2736690	2440000	14715.2	41446246	6
113	142	Pereda	2011	Evidence of reassortment of pandemic H1N1 influenza virus in swine in Argentina: are we facing the expansion of potential epicenters of influenza emergence?	Influenza Other Respir Viruses	24	5	NA	NA	NA	NA	NA	17	17	NA	100	nasal swabs, lung	RT-PCR	Isolation MDCK	NA	influenza A	H1N1pdm-reass	outbreak	1	1	farm	2009	2010	2	2010-2016	Post-pdm09	Argentina	Latin America	2736690	2440000	14715.2	41446246	6
114	143	Perera	2013	Swine influenza in Sri Lanka	Emerg Infect Dis	25	5	2004-2005 virology	300	1	NA	0.3	NA	NA	NA	NA	nasal and tracheal swabs	Isolation MDCK, Eggs	HI, NA-inhibition	Sequencing	H3N2	Other/NA	surveillance	0	0	slaughterhouse	2004	2005	2	2010-2016	Pre-pdm09	Sri Lanka	Asia	62710	80471	3279.89	20483000	0
115	144	Perera	2014	Molecular epidemiology of influenza A(H1N1)pdm09 virus among humans and swine, Sri Lanka	Emerg Infect Dis	321	5	virology	4683	26	NA	0.6	NA	NA	NA	NA	nasal and tracheal swabs	Isolation MDCK, Eggs	RT-PCR	NA	influenza A	H1N1pdm-reass	surveillance	0	0	slaughterhouse	2009	2013	5	2010-2016	Post-pdm09	Sri Lanka	Asia	62710	80471	3279.89	20483000	0
116	145	Perez	2013	Isolation and complete genomic characterization of pandemic H1N1/2009 influenza viruses from Cuban	Res Vet Sci	27	5	NA	NA	NA	NA	NA	238	78	32.8	32.8	nasal swabs, lung	RT-PCR	Isolation MDCK, Eggs	Sequencing	influenza A	H1N1pdm-reass	surveillance	1	1	farm	2010	2010	1	2010-2016	Post-pdm09	Cuba	Latin America	106440	1606900	6051.2	11265629	14
117	146	Perez	2015	Molecular epidemiology study of swine influenza virus revealing a reassorted virus H1N1 in swine farms in Cuba	Prev Vet Med	330	5	NA	NA	NA	NA	NA	7	5	NA	71.4	lung	RT-PCR	NA	NA	influenza A	H1N1pdm-reass	outbreak	1	1	farm	2010	2010	1	2010-2016	Post-pdm09	Cuba	Latin America	106440	1606900	6051.2	11265629	14
118	150	Poonsuk	2013	Genesis and genetic constellations of swine influenza viruses in Thailand	Vet Microbiol	28	5	NA	487	30	NA	6.2	NA	NA	NA	NA	nasal swabs	Isolation MDCK	RT-PCR	Sequencing	H1N1, H3N2	H1N1pdm-reass	surveillance	1	1	farm	2009	2011	3	2010-2016	Post-pdm09	Thailand	Asia	510890	7923654	5778.98	67010502	12
119	152	Pozzi	2010	Investigation of swine influenza sub-types H1N1, H32, N1N2 in pigs population in Israel (2002-2009)	Israel Journal of Veterinary Medicine	29	5	virology	40	0	NA	0	40	0	NA	0	lung, lymph node	RT-PCR	Isolation MDCK, Eggs	HI, NA-inhibition	influenza A	Other/NA	retrospective study	NA	0	farm	2002	2009	8	2010-2016	Pre-pdm09	Israel	Africa	21640	176900	36050.7	8059400	2
120	153	Qi	2012	Molecular characterization of avian-like H1N1 swine influenza a viruses isolated in Eastern China, 2011	Virol Sin	85	5	NA	60	6	NA	10	NA	NA	NA	NA	lung	Isolation MDCK	HI, NA-inhibition	Sequencing	H1N1	Other/NA	surveillance	NA	0	slaughterhouse	2011	2011	1	2010-2016	Post-pdm09	China	Asia	9388211	482398000	6807.43	1357380000	36
121	154	Qiao	2014	Novel triple reassortant H1N2 influenza viruses bearing six internal genes of the pandemic 2009/H1N1 influenza virus were detected in pigs in China	J Clin Virol	323	5	NA	2600	2	NA	0.1	NA	NA	NA	NA	nasal swabs	Isolation Eggs	NA	NA	influenza A	H1N1pdm-reass	surveillance	0	0	slaughterhouse	2012	2012	1	2010-2016	Post-pdm09	China	Asia	9388211	482398000	6807.43	1357380000	36
122	155	Rajao	2013	Diagnosis and clinic-pathological findings of influenza virus infection in Brazilian pigs	Pesquisa Veterinaria Brasileira	30	5	NA	86	31	36	36	86	36	41.9	41.9	lung	Isolation MDCK	RT-PCR	NA	influenza A	Other/NA	surveillance	1	1	farm	2009	2010	2	2010-2016	Post-pdm09	Brazil	Latin America	8358140	36743593	11208.1	200361925	18
123	157	Rammohan	2012	Increased prevalence of torque teno viruses in porcine respiratory disease complex affected pigs	Vet Microbiol	31	5	NA	NA	NA	NA	NA	45	11	24.44	24.4	lung	RT-PCR	NA	NA	influenza A	Other/NA	surveillance	1	1	farm	2012	2012	1	2010-2016	Post-pdm09	USA	North America	9147420	64775000	53042	316128839	20
124	160	Richards	2012	Notes from the field: Outbreak of influenza A (H3N2) virus among persons and swine at a county fair - Indiana, July 2012	Morbidity and Mortality Weekly Report	33	5	NA	NA	NA	NA	NA	12	12	NA	100	NA	RT-PCR	Sequencing	NA	influenza A	Other/NA	outbreak	1	1	agricultural fair	2012	2012	1	2010-2016	Post-pdm09	USA	North America	9147420	64775000	53042	316128839	20
125	161	Rith	2013	Serologic evidence of human influenza virus infections in swine populations, Cambodia	Influenza Other Respir Viruses	13	5	virology	1000	0	NA	0	NA	NA	NA	NA	nasal swabs	Isolation	NA	NA	influenza A	Other/NA	surveillance	0	0	slaughterhouse	2006	2008	3	2010-2016	Pre-pdm09	Cambodia	Asia	176520	2150000	1006.84	15135169	14
126	164	SAC C VS	2010	First cases of pandemic H1N1/09 influenza in Scottish pigs	Vet Rec	81	5	NA	NA	NA	NA	NA	2	2	100	100	lung	RT-PCR	NA	NA	influenza A	H1N1pdm-reass	outbreak	1	1	farm	2010	2010	1	2010-2016	Post-pdm09	UK	Europe	241930	4885000	41781.1	64097085	8
127	165	Saito	2014	Swine influenza surveillance in the southeast Asia	Journal of Disaster Research	324	5	Thailand	3000	54	NA	1.8	NA	NA	NA	NA	nasal swabs	Isolation MDCK, Eggs	NA	NA	influenza A	H1N1pdm-reass	surveillance	0	0	farm	2005	2013	9	2010-2016	Post-pdm09	Thailand	Asia	510890	7923654	5778.98	67010502	12
128	165	Saito	2014	Swine influenza surveillance in the southeast Asia	Journal of Disaster Research	325	5	Vietnam	6000	150	NA	2.5	NA	NA	NA	NA	nasal swabs	Isolation MDCK, Eggs	NA	NA	influenza A	H1N1pdm-reass	surveillance	0	0	farm	2010	2013	4	2010-2016	Post-pdm09	Vietnam	Asia	310070	26261400	1910.51	89708900	29
129	166	Schaefer	2011	Isolation and characterization of a pandemic H1N1 influenza virus in pigs in Brazil	Pesquisa Veterinaria Brasileira	35	5	NA	3	1	NA	33.3	12	12	NA	100	nasal swabs, lung	RT-PCR	Isolation Eggs	Sequencing	H1N1	H1N1pdm-reass	outbreak	1	1	farm	2010	2010	1	2010-2016	Post-pdm09	Brazil	Latin America	8358140	36743593	11208.1	200361925	18
130	167	Schaefer	2014	A human-like H1N2 influenza virus detected during an outbreak of acute respiratory disease in swine in Brazil	Arch Virol	34	5	NA	4	2	NA	50	4	4	NA	100	lung	RT-PCR	Isolation Eggs	Sequencing	H1N2	H1N1pdm-reass	outbreak	1	1	farm	2011	2011	1	2010-2016	Post-pdm09	Brazil	Latin America	8358140	36743593	11208.1	200361925	18
131	168	Schmidt	2015	Swine Influenza Virus and Association with the Porcine Respiratory Disease Complex in Pig Farms in Southern Brazil	J Virol	326	5	NA	66	37	NA	56.1	66	46	NA	69.7	nasal swabs	RT-PCR	Isolation MDCK	NA	influenza A	H1N1pdm-reass	outbreak	1	1	farm	2013	2014	2	2010-2016	Post-pdm09	Brazil	Latin America	8358140	36743593	11208.1	200361925	18
132	169	Shieh	2008	Surveillance of avian and swine influenza in the swine population in Taiwan, 2004	J Microbiol Immunol Infect	36	5	virology	881	2	NA	0.2	881	7	NA	0.8	nasal swabs	Isolation Eggs	RT-PCR	Sequencing	H1N2, H3N1	Other/NA	surveillance	NA	0	slaughterhouse	2004	2004	1	2005-2009	Pre-pdm09	Taiwan	Asia	36193	6300000	39600	23340000	27
133	170	Shimada	2004	Existence of reassortant A (H1N2) swine influenza viruses in Saitama Prefecture, Japan	International Congress Series	37	5	NA	492	7	NA	1.4	NA	NA	NA	NA	nasal and tracheal swabs	Isolation MDCK	Sequencing	NA	H1N2	Other/NA	surveillance	0	0	slaughterhouse	1999	2001	3	2000-2004	Pre-pdm09	Japan	Asia	364560	9685000	38633.7	127338621	8
134	174	Song	2003	Isolation of H3N2 swine influenza virus in South Korea	J Vet Diagn Invest	38	5	NA	3	3	100	100	NA	NA	NA	NA	lung	Isolation MDCK	HI	RT-PCR, sequencing	H3N2	Other/NA	outbreak	1	1	farm	1998	1998	1	2000-2004	Pre-pdm09	South Korea	Asia	97350	9912204	25977	50219669	20
135	175	Song	2010	Evidence of human-to-swine transmission of the pandemic (H1N1) 2009 influenza virus in South Korea	J Clin Microbiol	39	5	virology	456	42	9.21	9.2	NA	NA	NA	NA	lung	Isolation MDCK	RT-PCR	Sequencing	H1N1	H1N1pdm-reass	surveillance	NA	0	slaughterhouse	2009	2010	2	2010-2016	Post-pdm09	South Korea	Asia	97350	9912204	25977	50219669	20
136	177	Sreta	2010	Pandemic (H1N1) 2009 virus on commercial swine farm, Thailand	Emerg Infect Dis	40	5	NA	175	8	NA	4.6	175	15	NA	8.6	nasal swabs	RT-PCR	Isolation MDCK	NA	H1N1	H1N1pdm-reass	monitoring	2	2	farm	2009	2010	2	2010-2016	Post-pdm09	Thailand	Asia	510890	7923654	5778.98	67010502	12
137	179	Starick	2011	Reassorted pandemic (H1N1) 2009 influenza A virus discovered from pigs in Germany	J Gen Virol	41	5	NA	641	20	NA	3.1	NA	NA	NA	NA	nasal swabs, lung	RT-PCR	Isolation MDCK	Sequencing	H1N1	H1N1pdm-reass	surveillance	1	1	farm	2009	2010	2	2010-2016	Post-pdm09	Germany	Europe	348540	27690100	46251.4	80621788	34
138	181	Sun	2016	Novel triple-reassortant H1N1 swine influenza viruses in pigs in Tianjin, Northern China	Vet Microbiol	331	5	NA	1238	10	NA	0.8	NA	NA	NA	NA	nasal swabs	Isolation Eggs	HI, NA-inhibition	NA	H1N1	H1N1pdm-reass	surveillance	1	1	farm	2009	2013	5	2010-2016	Post-pdm09	China	Asia	9388211	482398000	6807.43	1357380000	36
139	183	Tinoco	2016	Transmission dynamics of pandemic influenza A(H1N1)pdm09 virus in humans and swine in backyard farms in Tumbes, Peru	Influenza Other Respir Viruses	336	5	viro pre-pandemic	310	0	0	0	NA	NA	NA	NA	tracheal swabs	Isolation Eggs	RT-PCR	NA	influenza A	H1N1pdm-reass	cross-sectional	0	0	farm	2009	2009	1	2010-2016	Post-pdm09	Peru	Latin America	1280000	3132335	6661.59	30375603	10
140	183	Tinoco	2016	Transmission dynamics of pandemic influenza A(H1N1)pdm09 virus in humans and swine in backyard farms in Tumbes, Peru	Influenza Other Respir Viruses	337	5	viro peak-pandemic	288	3	1	1	NA	NA	NA	NA	tracheal swabs	Isolation Eggs	RT-PCR	NA	influenza A	H1N1pdm-reass	cross-sectional	0	0	farm	2009	2009	1	2010-2016	Post-pdm09	Peru	Latin America	1280000	3132335	6661.59	30375603	10
141	183	Tinoco	2016	Transmission dynamics of pandemic influenza A(H1N1)pdm09 virus in humans and swine in backyard farms in Tumbes, Peru	Influenza Other Respir Viruses	338	5	viro 1st post-pandemic	325	0	0	0	NA	NA	NA	NA	tracheal swabs	Isolation Eggs	RT-PCR	NA	influenza A	H1N1pdm-reass	cross-sectional	0	0	farm	2010	2010	1	2010-2016	Post-pdm09	Peru	Latin America	1280000	3132335	6661.59	30375603	10
142	184	Trevennec	2011	Swine influenza in Vietnam: preliminary results of epidemiological studies	Influenza Other Respir Viruses	43	5	virology	146	0	0	0	146	0	NA	0	nasal swabs	RT-PCR	Isolation	NA	influenza A	Other/NA	cross-sectional	0	0	farm	2009	2009	1	2010-2016	Post-pdm09	Vietnam	Asia	310070	26261400	1910.51	89708900	29
143	186	Trevennec	2012	Transmission of pandemic influenza H1N1 (2009) in Vietnamese swine in 2009-2010	Influenza Other Respir Viruses	44	5	virology	710	0	0	0	710	0	NA	0	nasal and tracheal swabs	Isolation MDCK	RT-PCR	NA	influenza A	Other/NA	surveillance	0	0	slaughterhouse	2009	2010	2	2010-2016	Post-pdm09	Vietnam	Asia	310070	26261400	1910.51	89708900	29
144	186	Trevennec	2012	Transmission of pandemic influenza H1N1 (2009) in Vietnamese swine in 2009-2010	Influenza Other Respir Viruses	80	5	virology farm	38	0	0	0	38	0	NA	0	nasal swabs	Isolation MDCK	RT-PCR	NA	influenza A	Other/NA	surveillance	1	1	farm	2009	2010	2	2010-2016	Post-pdm09	Vietnam	Asia	310070	26261400	1910.51	89708900	29
145	187	Tu	2009	Isolation and molecular characterization of equine H3N8 influenza viruses from pigs in China	Arch Virol	45	5	NA	1920	10	NA	0.5	NA	NA	NA	NA	nasal swabs, lung	Isolation Eggs	Sequencing	NA	H1N1, H3N2, H5N1, H3N8	Other/NA	surveillance	2	2	farm	2004	2006	3	2005-2009	Pre-pdm09	China	Asia	9388211	482398000	6807.43	1357380000	36
146	188	Valheim	2011	Pathological Findings and Distribution of Pandemic Influenza A (H1N1) 2009 Virus in Lungs from Naturally Infected Fattening Pigs in Norway	Influenza Res Treat	46	5	NA	NA	NA	NA	NA	27	21	NA	77.8	tracheal swabs	RT-PCR	NA	NA	influenza A	H1N1pdm-reass	surveillance	1	1	slaughterhouse	2009	2009	1	2010-2016	Post-pdm09	Norway	Europe	365268	848063	100898	5084190	17
147	189	Van Reeth	2000	Isolations of H1N2 influenza A virus from pigs in Belgium	Influenza Other Respir Viruses	48	5	virology	96	17	NA	17.7	NA	NA	NA	NA	nasal swabs	Isolation Eggs	HI, NA-inhibition	NA	H1N1, H1N2, H3N2	Other/NA	surveillance	0	0	farm	1999	1999	1	2000-2004	Pre-pdm09	Belgium	Europe	30280	6592978	46929.6	11195138	59
148	191	Vijaykrishna	2011	Long-term evolution and transmission dynamics of swine influenza A virus	Nature	49	5	virology	38000	672	NA	1.8	NA	NA	NA	NA	nasal and tracheal swabs	Isolation MDCK, Eggs	HI	Sequencing	H1N1, H1N2, H3N2, H9N2	Other/NA	surveillance	NA	0	slaughterhouse	1998	2010	13	2010-2016	Pre-pdm09	China	Asia	9388211	482398000	6807.43	1357380000	36
149	192	Wang	2013	Complete Genome Sequences of Six Avian-Like H1N1 Swine Influenza Viruses from Northwestern China	Genome Announc	50	5	NA	500	6	NA	1.2	NA	NA	NA	NA	nasal and tracheal swabs	Isolation	RT-PCR	Sequencing	H1N1	Other/NA	surveillance	0	0	other/NA	2011	2012	2	2010-2016	Post-pdm09	China	Asia	9388211	482398000	6807.43	1357380000	36
150	194	Watanabe	2012	Histopathological and immunohistochemical findings of swine with spontaneous influenza a infection in Brazil, 2009-2010	Pesquisa Veterinaria Brasileira	51	5	NA	NA	NA	NA	NA	60	27	45	45	lung	IHC	NA	NA	influenza A	Other/NA	surveillance	1	1	farm	2009	2010	2	2010-2016	Post-pdm09	Brazil	Latin America	8358140	36743593	11208.1	200361925	18
151	196	Weingartl	2010	Genetic and pathobiologic characterization of pandemic H1N1 2009 influenza viruses from a naturally infected swine herd	J Virol	53	5	NA	24	21	NA	87.5	24	21	NA	87.5	nasal swabs	RT-PCR	Isolation Eggs	Sequencing	H1N1	H1N1pdm-reass	outbreak	1	1	farm	2009	2009	1	2010-2016	Post-pdm09	Canada	North America	9093510	12879000	51964.3	35158304	37
152	198	Weller	2013	Detection and isolation of Influenza A virus subtype H1N1 from a small backyard swine herd in Colorado	J Vet Diagn Invest	54	5	NA	2	2	NA	100	2	2	NA	100	lung	RT-PCR	Isolation MDCK, Eggs	NA	H1N1	H1N1pdm-reass	outbreak	1	1	farm	2010	2010	1	2010-2016	Post-pdm09	USA	North America	9147420	64775000	53042	316128839	20
153	199	Welsh	2010	Initial incursion of pandemic (H1N1) 2009 influenza A virus into European pigs	Vet Rec	55	5	with ILI	6	5	NA	83.3	6	5	NA	83.3	lung	RT-PCR	Isolation Eggs	Sequencing	H1N1	H1N1pdm-reass	outbreak	1	1	farm	2009	2009	1	2010-2016	Post-pdm09	UK	Europe	241930	4885000	41781.1	64097085	8
154	199	Welsh	2010	Initial incursion of pandemic (H1N1) 2009 influenza A virus into European pigs	Vet Rec	82	5	wihtout ILI	NA	NA	NA	NA	143	4	NA	2.8	nasal swabs	RT-PCR	Sequencing	NA	H1N1	H1N1pdm-reass	surveillance	0	0	farm	2009	2009	1	2010-2016	Post-pdm09	UK	Europe	241930	4885000	41781.1	64097085	8
155	200	Williamson	2012	Descriptive clinical and epidemiological characteristics of influenza A H1N1 2009 virus infections in pigs in England	Vet Rec	56	5	NA	NA	NA	NA	NA	227	36	NA	15.9	lung, tonsil, nasal swabs	RT-PCR	NA	NA	influenza A	H1N1pdm-reass	surveillance	1	1	farm	2009	2010	2	2010-2016	Post-pdm09	UK	Europe	241930	4885000	41781.1	64097085	8
156	201	Wu	2011	Serological and virological surveillance of swine H1N1 and H3N2 influenza virus infection in two farms located in Hubei province, central China	Zoonoses Public Health	57	5	virology	NA	NA	NA	NA	480	1	NA	0.2	nasal swabs	RT-PCR	Sequencing	NA	influenza A	Other/NA	surveillance	0	0	farm	2008	2009	2	2010-2016	Pre-pdm09	China	Asia	9388211	482398000	6807.43	1357380000	36
157	202	Xu	2004	Isolation and identification of swine influenza recombinant A/Swine/Shandong/1/2003(H9N2) virus	Microbes Infect	58	5	NA	211	10	NA	4.7	NA	NA	NA	NA	tracheal swabs, lung	Isolation Eggs	Sequencing	NA	H9N2	Other/NA	surveillance	1	1	farm	2002	2003	2	2000-2004	Pre-pdm09	China	Asia	9388211	482398000	6807.43	1357380000	36
158	203	Xu	2009	Two genotypes of H1N2 swine influenza viruses appeared among pigs in China	J Clin Virol	59	5	NA	120	2	NA	1.7	NA	NA	NA	NA	nasal swabs	Isolation Eggs	RT-PCR	Sequencing	H1N2	Other/NA	surveillance	1	1	other/NA	2004	2006	3	2005-2009	Pre-pdm09	China	Asia	9388211	482398000	6807.43	1357380000	36
159	204	Yaeger	2009	Survey of disease pressures in twenty-six niche herds in the midwestern United States	Journal of Swine Health and Production	60	5	virology	NA	NA	NA	NA	120	4	NA	3.3	lung	RT-PCR	NA	NA	influenza A	Other/NA	surveillance	1	1	farm	2006	2007	2	2005-2009	Pre-pdm09	USA	North America	9147420	64775000	53042	316128839	20
160	205	Yan	2012	Pandemic (H1N1) 2009 virus circulating in pigs, Guangxi, China	Emerg Infect Dis	64	5	outbreak	3	3	NA	100	NA	NA	NA	NA	lung	RT-PCR	Isolation Eggs	HI, NA-inhibition	H1N1	H1N1pdm-reass	outbreak	1	1	farm	2011	2011	1	2010-2016	Post-pdm09	China	Asia	9388211	482398000	6807.43	1357380000	36
161	205	Yan	2012	Pandemic (H1N1) 2009 virus circulating in pigs, Guangxi, China	Emerg Infect Dis	65	5	surveillance viro	3000	10	NA	0.3	NA	NA	NA	NA	bronchial swabs	Isolation Eggs	Sequencing	NA	H1N1	H1N1pdm-reass	surveillance	NA	0	slaughterhouse	2011	2011	1	2010-2016	Post-pdm09	China	Asia	9388211	482398000	6807.43	1357380000	36
162	206	Yang	2012	Human infection from avian-like influenza A (H1N1) viruses in pigs, China	Emerg Infect Dis	66	5	virology	60	3	NA	5	NA	NA	NA	NA	nasal swabs	Isolation Eggs	HI, NA-inhibition	Sequencing	H1N1	Other/NA	human outbreak	NA	0	other/NA	2011	2011	1	2010-2016	Post-pdm09	China	Asia	9388211	482398000	6807.43	1357380000	36
163	207	Yao	2007	[Genome sequence analysis of an H3N2 subtype swine influenza virus isolated from Guangdong province in China]	Wei Sheng Wu Xue Bao	87	5	NA	105	4	NA	3.8	NA	NA	NA	NA	nasal swabs	Isolation	Sequencing	NA	H3N2	Other/NA	outbreak	1	1	farm	2005	2005	1	2005-2009	Pre-pdm09	China	Asia	9388211	482398000	6807.43	1357380000	36
164	209	Yu	2009	Isolation and genetic characterization of avian-like H1N1 and novel ressortant H1N2 influenza viruses from pigs in China	Biochem Biophys Res Commun	67	5	NA	650	11	NA	1.7	NA	NA	NA	NA	lung, trachea, nasal swabs	Isolation Eggs	HI, NA-inhibition	Sequencing	H1N1, H1N2, H3N2, H9N2	Other/NA	surveillance	1	1	other/NA	2005	2007	3	2005-2009	Pre-pdm09	China	Asia	9388211	482398000	6807.43	1357380000	36
165	211	Zhang	2011	Identification of an H6N6 swine influenza virus in southern China	Infect Genet Evol	68	5	virology	847	9	NA	1.1	847	35	NA	4.1	nasal swabs, lung	RT-PCR	Isolation Eggs	HI, NA-inhibition	H1N1, H1N2, H3N2, H9N2, H6N6	Other/NA	surveillance	1	1	farm	2010	2010	1	2010-2016	Post-pdm09	China	Asia	9388211	482398000	6807.43	1357380000	36
166	212	Zhao	2012	Isolation and phylogenetic analysis of avian-origin European H1N1 swine influenza viruses in Jiangsu, China	Virus Genes	72	5	farms	152	0	NA	0	NA	NA	NA	NA	nasal swabs	Isolation Eggs	HI	RT-PCR, sequencing	influenza A	Other/NA	surveillance	0	0	farm	2010	2010	1	2010-2016	Post-pdm09	China	Asia	9388211	482398000	6807.43	1357380000	36
167	212	Zhao	2012	Isolation and phylogenetic analysis of avian-origin European H1N1 swine influenza viruses in Jiangsu, China	Virus Genes	73	5	slaughterhouses	878	32	NA	3.6	NA	NA	NA	NA	nasal swabs	Isolation Eggs	HI	RT-PCR, sequencing	H1N1	Other/NA	surveillance	0	0	slaughterhouse	2010	2011	2	2010-2016	Post-pdm09	China	Asia	9388211	482398000	6807.43	1357380000	36
168	213	Zhao	2012	Isolation and phylogenetic analysis of pandemic H1N1/09 influenza virus from swine in Jiangsu province of China	Res Vet Sci	70	5	farms	54	0	NA	0	NA	NA	NA	NA	nasal swabs	Isolation Eggs	HI	RT-PCR, sequencing	influenza A	Other/NA	surveillance	0	0	farm	2010	2010	1	2010-2016	Post-pdm09	China	Asia	9388211	482398000	6807.43	1357380000	36
169	213	Zhao	2012	Isolation and phylogenetic analysis of pandemic H1N1/09 influenza virus from swine in Jiangsu province of China	Res Vet Sci	71	5	slaughterhouses	975	10	NA	1	NA	NA	NA	NA	nasal swabs	Isolation Eggs	HI	RT-PCR, sequencing	H1N1, H9N2	H1N1pdm-reass	surveillance	0	0	slaughterhouse	2010	2010	1	2010-2016	Post-pdm09	China	Asia	9388211	482398000	6807.43	1357380000	36
170	214	Zhao	2013	Characterisation of one H6N6 influenza virus isolated from swine in China	Res Vet Sci	69	5	NA	6	6	NA	100	NA	NA	NA	NA	nasal swabs	Isolation Eggs	RT-PCR	Sequencing	H6N6	Other/NA	outbreak	1	1	farm	2009	2009	1	2010-2016	Post-pdm09	China	Asia	9388211	482398000	6807.43	1357380000	36
